# Supplementary material for: Quantum Chemistry as a Tool in Asymmetric Biocatalysis: Limonene Epoxide Hydrolase Test Case
Source: PubMed Central journal article supplement (PMC3734700; doi:10.1002/anie.201300594), 2013-03-19
Supplement: anie0052-4563-SD1.pdf [file anie0052-4563-SD1.pdf]

Supporting Information

© Wiley-VCH 2013

69451 Weinheim, Germany

**Quantum Chemistry as a Tool in Asymmetric Biocatalysis: Limonene Epoxide Hydrolase Test Case\*\***

*Maria E. S. Lind and Fahmi Himo\**

anie\_201300594\_sm\_miscellaneous\_information.pdf

## 1. Computational Details

All calculations were performed using the hybrid density functional B3LYP<sup>[1]</sup> as implemented in the Gaussian03 program package.<sup>[2]</sup> Geometry optimizations were carried out employing the 6-31G(d,p) basis set. More accurate energies were obtained by single-point calculations on the optimized geometries using the larger 6-311+G(2d,2p) basis set. The polarization effects of the enzyme environment not explicitly included in the model were taken into account by single-point calculations using the conductor-like polarizable continuum model (CPCM)<sup>[3]</sup> with a dielectric constant of 4 and the UA0 radii. Analytical frequencies were calculated at the same level of theory as the geometry optimizations to confirm the nature of the stationary points and also to obtain zero-point energies (ZPE). Fixing coordinates introduces a few small imaginary frequencies, in this case all below  $50i\text{ cm}^{-1}$ . These small frequencies have little impact on the ZPE and can therefore be disregarded. All energies reported in the paper include also the dispersion effect according to the B3LYP-D2 method of Grimme.<sup>[4]</sup>

- [1] a) A. D. Becke, *J. Chem. Phys.* **1993**, *98*, 5648; b) C. Lee, W. Yang, R. G. Parr, *Phys. Rev. B* **1988**, *37*, 785.
- [2] Gaussian 03, Revision D.01 and E.01, M. J. Frisch, G. W. Trucks, H. B. Schlegel, G. E. Scuseria, M. A. Robb, J. R. Cheeseman, J. A. Montgomery, Jr., T. Vreven, K. N. Kudin, J. C. Burant, J. M. Millam, S. S. Iyengar, J. Tomasi, V. Barone, B. Mennucci, M. Cossi, G. Scalmani, N. Rega, G. A. Petersson, H. Nakatsuji, M. Hada, M. Ehara, K. Toyota, R. Fukuda, J. Hasegawa, M. Ishida, T. Nakajima, Y. Honda, O. Kitao, H. Nakai, M. Klene, X. Li, J. E. Knox, H. P. Hratchian, J. B. Cross, V. Bakken, C. Adamo, J. Jaramillo, R. Gomperts, R. E. Stratmann, O. Yazyev, A. J. Austin, R. Cammi, C. Pomelli, J. W. Ochterski, P. Y. Ayala, K. Morokuma, G. A. Voth, P. Salvador, J. J. Dannenberg, V. G. Zakrzewski, S. Dapprich, A. D. Daniels, M. C. Strain, O. Farkas, D. K. Malick, A. D. Rabuck, K. Raghavachari, J. B. Foresman, J. V. Ortiz, Q. Cui, A. G. Baboul, S. Clifford, J. Cioslowski, B. B. Stefanov, G. Liu, A. Liashenko, P. Piskorz, I. Komaromi, R. L. Martin, D. J. Fox, T. Keith, M. A. Al-Laham, C. Y. Peng, A. Nanayakkara, M. Challacombe, P. M. W. Gill, B. Johnson, W. Chen, M. W. Wong, C. Gonzalez, and J. A. Pople, Gaussian, Inc., Wallingford CT, 2004.
- [3] a) M. Cossi, N. Rega, G. Scalmani, V. Barone, *J. Comput. Chem.* **2003**, *24*, 669; b) V. Barone, M. Cossi, *J. Phys. Chem. A* **1998**, *102*, 1995; c) J. Andzelm, C. Kölmel, A. Klamt, *J. Chem. Phys.* **1995**, *103*, 9312; d) A. Klamt, G. Schüürmann, *J. Chem. Soc., Perkin Trans. 2 (1972–1999)* **1993**, 799.
- [4] S. Grimme, *J. Comput. Chem.* **2006**, *27*, 1787.

## 2. Table of Calculated Geometric Parameters

**Table S1.** Calculated geometric parameters (in Angstrom and degrees) for WT and all mutants.

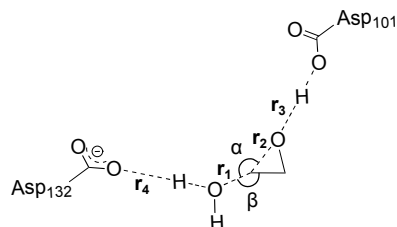

|                  | TS <sub>C1</sub> |                |                |                |       |       | TS <sub>C2</sub> |                |                |                |       |       |
|------------------|------------------|----------------|----------------|----------------|-------|-------|------------------|----------------|----------------|----------------|-------|-------|
|                  | r <sub>1</sub>   | r <sub>2</sub> | r <sub>3</sub> | r <sub>4</sub> | α     | β     | r <sub>1</sub>   | r <sub>2</sub> | r <sub>3</sub> | r <sub>4</sub> | α     | β     |
| <b>WT</b>        | 2.21             | 1.93           | 1.08           | 1.52           | 150.1 | 103.7 | 2.18             | 1.95           | 1.08           | 1.54           | 150.3 | 104.3 |
| <b>Mutant R1</b> | 2.23             | 1.94           | 1.08           | 1.52           | 148.9 | 102.9 | 2.19             | 1.93           | 1.07           | 1.53           | 150.5 | 103.8 |
| <b>Mutant R2</b> | 2.22             | 1.93           | 1.08           | 1.52           | 149.5 | 103.3 | 2.18             | 1.94           | 1.07           | 1.53           | 150.8 | 104.3 |
| <b>Mutant R3</b> | 2.22             | 1.93           | 1.08           | 1.52           | 149.2 | 102.7 | 2.16             | 1.95           | 1.07           | 1.52           | 150.6 | 104.6 |
| <b>Mutant S1</b> | 2.21             | 1.93           | 1.11           | 1.56           | 150.2 | 103.9 | 2.20             | 1.97           | 1.09           | 1.56           | 147.5 | 102.5 |
| <b>Mutant S2</b> | 2.24             | 1.93           | 1.11           | 1.57           | 150.9 | 104.6 | 2.28             | 1.97           | 1.09           | 1.59           | 142.7 | 97.9  |
| <b>Mutant S3</b> | 2.25             | 1.94           | 1.10           | 1.57           | 151.1 | 105.1 | 2.25             | 1.99           | 1.08           | 1.58           | 142.9 | 98.4  |

### 3. Absolute Energies and Energy Corrections of Stationary Points

In all calculations a total charge of 0 and multiplicity of 1 were used. All energies are reported in Hartree.

|                  | <b>Geometry optimization:<br/>B3LYP/<br/>6-31(d,p)</b> | <b>Single-point CPCM:<br/>B3LYP/<br/>6-31(d,p)</b> | <b>Single-point:<br/>B3LYP/<br/>6-311+(2d,2p)</b> | <b>ZPE</b> | <b>Dispersion correction</b> |
|------------------|--------------------------------------------------------|----------------------------------------------------|---------------------------------------------------|------------|------------------------------|
| <b>WT</b>        |                                                        |                                                    |                                                   |            |                              |
| Reactant         | -5350.713212                                           | -5350.764494                                       | -5352.066201                                      | 2.305257   | -0.383362                    |
| TS C1            | -5350.680687                                           | -5350.732258                                       | -5352.034041                                      | 2.303219   | -0.388152                    |
| TS C2            | -5350.680149                                           | -5350.732280                                       | -5352.032265                                      | 2.303185   | -0.389536                    |
| <b>Mutant R1</b> |                                                        |                                                    |                                                   |            |                              |
| Reactant         | -5630.952658                                           | -5631.006927                                       | -5632.308633                                      | 2.220656   | -0.364716                    |
| TS C1            | -5630.922326                                           | -5630.977186                                       | -5632.277735                                      | 2.218758   | -0.370319                    |
| TS C2            | -5630.922361                                           | -5630.977959                                       | -5632.278090                                      | 2.218781   | -0.371113                    |
| <b>Mutant R2</b> |                                                        |                                                    |                                                   |            |                              |
| Reactant         | -5552.322256                                           | -5552.377093                                       | -5553.661197                                      | 2.161323   | -0.350955                    |
| TS C1            | -5552.291744                                           | -5552.347526                                       | -5553.629992                                      | 2.159074   | -0.356711                    |
| TS C2            | -5552.291983                                           | -5552.348127                                       | -5553.630015                                      | 2.159473   | -0.357319                    |
| <b>Mutant R3</b> |                                                        |                                                    |                                                   |            |                              |
| Reactant         | -5345.873215                                           | -5345.928434                                       | -5347.229891                                      | 2.212919   | -0.368870                    |
| TS C1            | -5345.844220                                           | -5345.898403                                       | -5347.200457                                      | 2.211500   | -0.373477                    |
| TS C2            | -5345.845585                                           | -5345.900428                                       | -5347.201414                                      | 2.212254   | -0.374197                    |
| <b>Mutant S1</b> |                                                        |                                                    |                                                   |            |                              |
| Reactant         | -5591.635316                                           | -5591.688940                                       | -5592.981980                                      | 2.191484   | -0.358899                    |
| TS C1            | -5591.604365                                           | -5591.658828                                       | -5592.949852                                      | 2.188943   | -0.364272                    |
| TS C2            | -5591.601664                                           | -5591.656538                                       | -5592.947659                                      | 2.189574   | -0.364392                    |
| <b>Mutant S2</b> |                                                        |                                                    |                                                   |            |                              |
| Reactant         | -5704.745473                                           | -5704.799298                                       | -5706.119302                                      | 2.189209   | -0.365000                    |
| TS C1            | -5704.714435                                           | -5704.769108                                       | -5706.086686                                      | 2.186865   | -0.372214                    |
| TS C2            | -5704.708387                                           | -5704.763738                                       | -5706.082363                                      | 2.186623   | -0.369879                    |
| <b>Mutant S3</b> |                                                        |                                                    |                                                   |            |                              |
| Reactant         | -5626.113484                                           | -5626.167961                                       | -5627.469365                                      | 2.130548   | -0.354397                    |
| TS C1            | -5626.083287                                           | -5626.138274                                       | -5627.438301                                      | 2.127491   | -0.360930                    |
| TS C2            | -5626.076742                                           | -5626.132566                                       | -5627.433713                                      | 2.127474   | -0.359202                    |

#### 4. Cartesian coordinates of stationary points

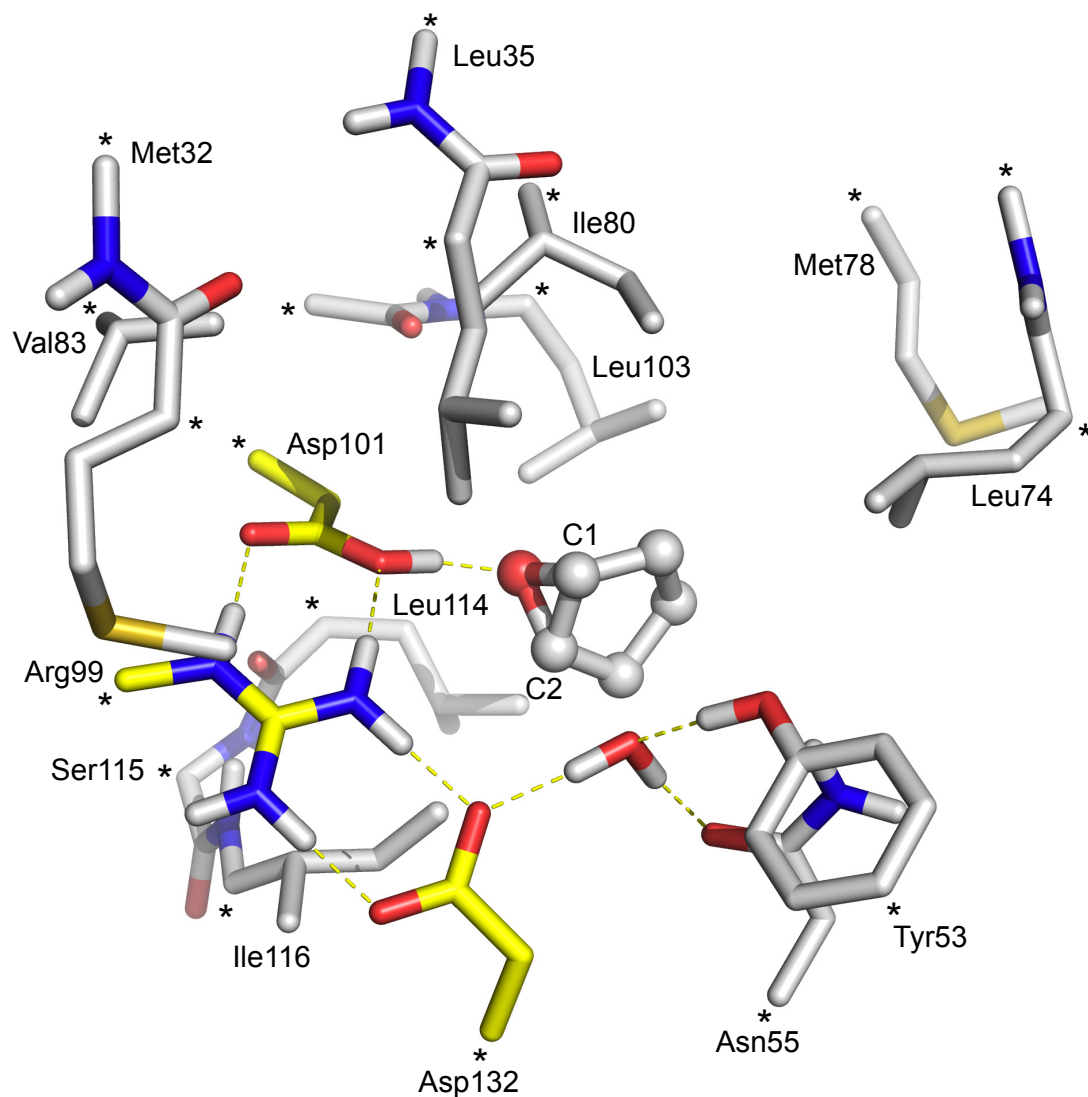

Asterisks indicate positions fixed to their crystallographic coordinates during the geometry optimizations. These apply to all structures except the variants containing the Leu114Cys mutation (*S1*, *S2* and *S3*) for which the fixing of the alpha carbon of Cys114 was released in order to grant flexibility to that side chain. Lists of the fixed centers are given below along with the Cartesian coordinates.

## 4.1 Wild-type LEH

The following atoms were kept fixed in the geometry optimizations of reactant and transition state structures: 1, 9, 10, 18, 19, 26, 31, 39, 40, 45, 50, 54, 59, 64, 68, 73, 81, 85, 90.

| <b>Reactant:</b> |           |           |           | C49 | 2.919811  | 4.004458  | -1.107634 |
|------------------|-----------|-----------|-----------|-----|-----------|-----------|-----------|
| C1               | -6.209395 | 5.841235  | 0.951198  | C50 | -5.488690 | 2.247291  | -4.777059 |
| C2               | -5.779370 | 6.770890  | -0.172372 | C51 | -5.664581 | 3.329032  | -3.701981 |
| O3               | -4.672634 | 6.652216  | -0.700513 | C52 | -6.530717 | 2.806834  | -2.546965 |
| C4               | -7.668097 | 5.864608  | 1.418069  | C53 | -4.306381 | 3.826862  | -3.187454 |
| C5               | -7.957838 | 4.942917  | 2.612433  | C54 | -6.780645 | -0.492661 | 0.496621  |
| S6               | -7.693121 | 3.141240  | 2.331207  | N55 | -5.337027 | -0.430955 | 0.648310  |
| C7               | -6.038739 | 2.878250  | 3.070398  | C56 | -4.669895 | -0.773079 | 1.768377  |
| N8               | -6.664569 | 7.735633  | -0.535153 | N57 | -5.323113 | -1.144209 | 2.884658  |
| C9               | -6.356473 | 8.718150  | -1.549019 | N58 | -3.341496 | -0.693147 | 1.796677  |
| C10              | -1.164015 | 6.921811  | -0.384290 | C59 | -2.962368 | -1.371784 | -4.328729 |
| C11              | -0.336914 | 7.128244  | -1.644705 | C60 | -2.056813 | -0.807419 | -3.231754 |
| O12              | 0.880444  | 6.951471  | -1.671559 | C61 | -2.804674 | -0.378347 | -1.985517 |
| C13              | -0.997002 | 5.486688  | 0.148153  | O62 | -4.017658 | -0.229838 | -1.934625 |
| C14              | -1.871058 | 5.148196  | 1.369476  | O63 | -2.075212 | -0.135081 | -0.887516 |
| C15              | -1.749920 | 3.654262  | 1.708726  | C64 | -0.877495 | -1.145320 | -7.519621 |
| C16              | -1.529321 | 6.007002  | 2.596217  | C65 | 0.325420  | -0.798054 | -6.664255 |
| N17              | -1.043827 | 7.527615  | -2.743663 | O66 | 0.281780  | 0.031610  | -5.758841 |
| C18              | -0.416760 | 7.710332  | -4.038680 | N67 | 1.452960  | -1.484928 | -7.002344 |
| C19              | 2.574957  | 1.070906  | 9.137398  | C68 | 2.769776  | -1.198895 | -6.460663 |
| C20              | 1.510002  | 0.396181  | 8.536035  | C69 | 3.427286  | -2.387308 | -5.720676 |
| C21              | 3.575919  | 1.615848  | 8.329447  | C70 | 3.288044  | -2.387963 | -4.181875 |
| C22              | 1.443450  | 0.252751  | 7.149879  | C71 | 4.098153  | -1.247784 | -3.544628 |
| C23              | 3.521589  | 1.482886  | 6.943122  | C72 | 1.824985  | -2.361769 | -3.716652 |
| C24              | 2.455029  | 0.797236  | 6.344606  | C73 | -1.562657 | -6.432758 | -4.513316 |
| O25              | 2.466406  | 0.655598  | 4.989101  | C74 | -2.837210 | -6.408259 | -3.681542 |
| C26              | 2.562819  | -4.802401 | 6.846202  | O75 | -3.337710 | -5.358826 | -3.268998 |
| C27              | 3.635447  | -4.314623 | 5.862188  | C76 | -0.342012 | -5.946684 | -3.707450 |
| C28              | 3.142574  | -3.089782 | 5.107454  | C77 | 0.089064  | -6.863337 | -2.544907 |
| N29              | 3.886798  | -1.966463 | 5.206758  | C78 | 0.590489  | -8.232262 | -3.029308 |
| O30              | 2.098355  | -3.151028 | 4.443502  | C79 | 1.162798  | -6.170017 | -1.693762 |
| C31              | 9.033309  | 2.049470  | 1.721550  | N80 | -3.399295 | -7.619821 | -3.427209 |
| C32              | 9.142052  | 2.815591  | 0.425170  | C81 | -4.736512 | -7.747616 | -2.871660 |
| O33              | 9.691860  | 2.340970  | -0.570387 | C82 | -4.864455 | -7.779011 | -1.340233 |
| C34              | 7.796028  | 2.278034  | 2.607248  | O83 | -5.202047 | -8.805598 | -0.758878 |
| C35              | 6.438827  | 1.907004  | 1.975784  | N84 | -4.647429 | -6.586086 | -0.730741 |
| C36              | 6.345671  | 0.409348  | 1.648916  | C85 | -4.970129 | -6.379787 | 0.675526  |
| C37              | 5.287792  | 2.333387  | 2.897897  | C86 | -4.063485 | -5.355284 | 1.365461  |
| N38              | 8.654952  | 4.080362  | 0.461718  | C87 | -2.603397 | -5.844524 | 1.441775  |
| C39              | 8.731458  | 4.950420  | -0.679021 | C88 | -4.648814 | -5.035570 | 2.746813  |
| C40              | 8.355975  | 1.390059  | -4.313563 | C89 | -1.580245 | -4.715567 | 1.598502  |
| C41              | 9.025879  | 0.125070  | -3.763448 | C90 | -2.338554 | -4.513584 | 6.202729  |
| C42              | 8.470636  | -0.248241 | -2.387287 | C91 | -1.775168 | -3.131487 | 5.836846  |
| S43              | 9.276887  | -1.685142 | -1.570403 | C92 | -2.594648 | -2.357515 | 4.789139  |
| C44              | 10.912368 | -0.960412 | -1.175052 | O93 | -3.845611 | -2.480545 | 4.795971  |
| C45              | 1.943681  | 3.162884  | -4.816808 | O94 | -1.947587 | -1.613388 | 3.973492  |
| C46              | 1.704442  | 3.542551  | -3.348266 | O95 | 0.636962  | -0.870166 | 3.966301  |
| C47              | 3.021441  | 3.489329  | -2.548493 | H96 | -7.951706 | 6.878746  | 1.738335  |
| C48              | 0.609687  | 2.654823  | -2.736106 | H97 | -8.330313 | 5.591848  | 0.587379  |
|                  |           |           |           | H98 | -7.361157 | 5.235165  | 3.483093  |
|                  |           |           |           | H99 | -9.009050 | 5.042997  | 2.897482  |

|      |           |           |           |      |           |           |           |
|------|-----------|-----------|-----------|------|-----------|-----------|-----------|
| H100 | -6.011961 | 3.258368  | 4.094641  | H160 | 4.082646  | -1.321986 | -2.452732 |
| H101 | -5.878263 | 1.798179  | 3.100826  | H161 | 3.692662  | -0.263805 | -3.806078 |
| H102 | -5.243712 | 3.337673  | 2.479901  | H162 | 5.145830  | -1.276334 | -3.865475 |
| H103 | -5.945257 | 4.831641  | 0.621786  | H163 | 1.760366  | -2.403061 | -2.624506 |
| H104 | -7.160186 | 8.780092  | -2.289819 | H164 | 1.320122  | -1.445941 | -4.039451 |
| H105 | -1.249906 | 4.787883  | -0.659931 | H165 | 1.267015  | -3.214293 | -4.120659 |
| H106 | 0.060975  | 5.318225  | 0.383125  | H166 | 2.647438  | -0.337096 | -5.802527 |
| H107 | -2.913362 | 5.351405  | 1.085212  | H167 | -0.582295 | -4.953074 | -3.312733 |
| H108 | -2.399165 | 3.379161  | 2.547588  | H168 | 0.505031  | -5.817466 | -4.394360 |
| H109 | -2.022199 | 3.025233  | 0.853601  | H169 | -0.787657 | -7.030712 | -1.902408 |
| H110 | -0.721586 | 3.402275  | 1.996979  | H170 | 0.889028  | -8.860007 | -2.183614 |
| H111 | -2.153863 | 5.733022  | 3.454035  | H171 | -0.171518 | -8.785312 | -3.588918 |
| H112 | -1.680360 | 7.074510  | 2.407182  | H172 | 1.463835  | -8.118767 | -3.683403 |
| H113 | -0.482831 | 5.865368  | 2.892956  | H173 | 1.459851  | -6.794388 | -0.844779 |
| H114 | -0.797831 | 7.643206  | 0.355490  | H174 | 0.799586  | -5.215847 | -1.298013 |
| H115 | -0.638064 | 6.881691  | -4.723059 | H175 | 2.062812  | -5.965106 | -2.286347 |
| H116 | 0.720883  | -0.029593 | 9.150098  | H176 | -1.385622 | -7.426281 | -4.938559 |
| H117 | 4.407191  | 2.151155  | 8.780728  | H177 | -5.335728 | -6.915990 | -3.258140 |
| H118 | 0.624613  | -0.282651 | 6.679561  | H178 | -4.082155 | -4.432503 | 0.762358  |
| H119 | 4.290668  | 1.910227  | 6.306844  | H179 | -5.672665 | -4.652457 | 2.661365  |
| H120 | 1.637450  | 0.189121  | 4.661641  | H180 | -4.071678 | -4.288110 | 3.292645  |
| H121 | 3.836656  | -5.094141 | 5.118679  | H181 | -4.691624 | -5.942185 | 3.363167  |
| H122 | 4.578407  | -4.108594 | 6.380581  | H182 | -2.367942 | -6.409731 | 0.531531  |
| H123 | 1.630869  | -5.003833 | 6.313767  | H183 | -2.513028 | -6.555323 | 2.274775  |
| H124 | 7.761724  | 3.322803  | 2.950929  | H184 | -1.578656 | -4.084447 | 0.701628  |
| H125 | 7.929310  | 1.688942  | 3.524588  | H185 | -0.567653 | -5.112030 | 1.726365  |
| H126 | 6.339486  | 2.466022  | 1.033905  | H186 | -1.793228 | -4.068561 | 2.454672  |
| H127 | 5.371241  | 0.172879  | 1.211911  | H187 | -4.896771 | -7.355431 | 1.164716  |
| H128 | 6.453874  | -0.194320 | 2.558948  | H188 | -1.749212 | -2.500760 | 6.737066  |
| H129 | 7.110408  | 0.083025  | 0.937853  | H189 | -0.742502 | -3.207938 | 5.482626  |
| H130 | 5.328497  | 3.404516  | 3.126481  | H190 | -2.304436 | -5.193843 | 5.345556  |
| H131 | 4.314637  | 2.127623  | 2.442837  | H191 | 8.758377  | 1.658211  | -5.296175 |
| H132 | 5.320403  | 1.787180  | 3.847898  | H192 | 10.105543 | 0.297233  | -3.685588 |
| H133 | 9.125513  | 0.992580  | 1.460231  | H193 | 10.786774 | 0.028144  | -0.726568 |
| H134 | 7.743476  | 5.141854  | -1.115296 | H194 | 11.392861 | -1.631510 | -0.459282 |
| H135 | 1.352070  | 4.583754  | -3.315097 | H195 | -7.164150 | -1.522161 | 0.519842  |
| H136 | 0.350046  | 2.968963  | -1.720598 | H196 | -7.289840 | 0.093343  | 1.269403  |
| H137 | -0.304568 | 2.694798  | -3.338955 | H197 | -7.035180 | -0.057837 | -0.470134 |
| H138 | 0.931468  | 1.606371  | -2.695727 | H198 | -2.812000 | -0.995529 | 2.648169  |
| H139 | 3.401004  | 2.456089  | -2.550995 | C199 | 0.396745  | -1.565229 | 0.772407  |
| H140 | 3.771447  | 4.087217  | -3.083895 | C200 | 0.795326  | -0.160414 | 0.743097  |
| H141 | 2.486316  | 5.009740  | -1.081272 | O201 | 0.405241  | -0.831281 | -0.508292 |
| H142 | 2.292831  | 3.355223  | -0.486657 | C202 | 2.291395  | -0.059281 | 0.921689  |
| H143 | 3.908640  | 4.044704  | -0.636329 | C203 | 1.619348  | -2.434403 | 0.951447  |
| H144 | 2.264038  | 2.118494  | -4.906306 | C204 | 2.802741  | -1.490397 | 0.617475  |
| H145 | -6.186816 | 4.182307  | -4.160522 | H205 | 0.132367  | 0.645139  | 1.045685  |
| H146 | -6.694510 | 3.577551  | -1.785684 | H206 | 2.746838  | 0.703712  | 0.282727  |
| H147 | -7.512242 | 2.471372  | -2.901287 | H207 | 3.701219  | -1.739820 | 1.187064  |
| H148 | -6.038774 | 1.955867  | -2.060898 | H208 | 2.469190  | 0.216378  | 1.967042  |
| H149 | -4.421331 | 4.621325  | -2.442430 | H209 | 3.050621  | -1.570833 | -0.443290 |
| H150 | -3.691326 | 4.217774  | -4.006330 | H210 | 1.653039  | -2.760718 | 1.995641  |
| H151 | -3.749329 | 3.006289  | -2.719027 | H211 | 1.599074  | -3.328440 | 0.319674  |
| H152 | -4.994628 | 1.366424  | -4.350646 | H212 | -0.586081 | -1.884226 | 1.104458  |
| H153 | -1.494246 | 0.058837  | -3.603910 | H213 | 1.027759  | 3.262691  | -5.408982 |
| H154 | -1.294197 | -1.538398 | -2.937778 | H214 | 8.519179  | 2.237136  | -3.639055 |
| H155 | -3.737924 | -0.654929 | -4.607469 | H215 | 8.892078  | -0.714614 | -4.456163 |
| H156 | -1.055528 | -2.225798 | -7.543298 | H216 | 9.182110  | 5.912700  | -0.411945 |
| H157 | 3.014466  | -3.321165 | -6.125304 | H217 | 9.355268  | 4.461993  | -1.427284 |
| H158 | 4.496784  | -2.398427 | -5.965532 | H218 | 9.935109  | 2.290308  | 2.302411  |
| H159 | 3.733951  | -3.332222 | -3.837099 | H219 | 2.619818  | 1.176774  | 10.216892 |

|      |           |           |           |     |           |           |           |
|------|-----------|-----------|-----------|-----|-----------|-----------|-----------|
| H220 | 2.885661  | -5.719942 | 7.346382  | C16 | -1.108164 | 6.391556  | 2.417694  |
| H221 | 2.360644  | -4.049707 | 7.614690  | N17 | -0.833424 | 7.488589  | -3.046490 |
| H222 | -1.761541 | -4.966848 | 7.015358  | C18 | -0.236187 | 7.612869  | -4.361993 |
| H223 | -3.381651 | -4.426893 | 6.515998  | C19 | 2.850501  | 1.363386  | 8.981833  |
| H224 | -6.018544 | -6.059019 | 0.767631  | C20 | 1.693415  | 0.772466  | 8.468058  |
| H225 | -5.166152 | -8.686252 | -3.224751 | C21 | 3.872949  | 1.727515  | 8.102075  |
| H226 | -1.732389 | -5.748918 | -5.351855 | C22 | 1.555793  | 0.531995  | 7.099018  |
| H227 | 3.418895  | -0.879692 | -7.285990 | C23 | 3.748613  | 1.496198  | 6.733363  |
| H228 | -0.720631 | -0.810939 | -8.551356 | C24 | 2.590395  | 0.892402  | 6.227144  |
| H229 | -3.449165 | -2.295921 | -4.003595 | O25 | 2.546327  | 0.647504  | 4.880681  |
| H230 | -2.852543 | -0.377633 | 0.966486  | C26 | 2.600465  | -4.585825 | 6.910642  |
| H231 | -4.790852 | -0.263153 | -0.201182 | C27 | 3.566326  | -4.298631 | 5.748840  |
| H232 | -0.748902 | 8.645398  | -4.501708 | C28 | 3.138285  | -3.043975 | 5.008237  |
| H233 | 0.660571  | 7.748891  | -3.876430 | N29 | 3.943140  | -1.965407 | 5.108640  |
| H234 | -6.202043 | 9.713904  | -1.116302 | O30 | 2.078037  | -3.033797 | 4.363064  |
| H235 | -5.437304 | 8.405150  | -2.043449 | C31 | 9.162441  | 1.862935  | 1.394174  |
| H236 | -5.542572 | 6.064197  | 1.795129  | C32 | 9.254241  | 2.581908  | 0.070770  |
| H237 | 7.273562  | 1.254557  | -4.423001 | O33 | 9.736506  | 2.041227  | -0.926249 |
| H238 | 11.545348 | -0.884823 | -2.062525 | C34 | 8.080677  | 2.286574  | 2.401258  |
| H239 | 8.548842  | 0.605199  | -1.708410 | C35 | 6.620449  | 2.057975  | 1.960484  |
| H240 | 7.413450  | -0.527088 | -2.462573 | C36 | 6.312292  | 0.568462  | 1.751459  |
| H241 | -2.224620 | 7.131883  | -0.558205 | C37 | 5.658982  | 2.675272  | 2.986067  |
| H242 | -1.758561 | -0.646106 | -7.121474 | N38 | 8.838591  | 3.871470  | 0.078503  |
| H243 | -6.454313 | 1.924184  | -5.182473 | C39 | 8.896285  | 4.682992  | -1.104987 |
| H244 | -4.877255 | 2.607593  | -5.611983 | C40 | 8.324712  | 1.006921  | -4.595955 |
| H245 | -2.364694 | -1.598324 | -5.211843 | C41 | 8.667069  | -0.310178 | -3.888988 |
| H246 | 2.713874  | 3.796066  | -5.272493 | C42 | 8.020448  | -0.379815 | -2.504123 |
| H247 | 4.640917  | -1.923160 | 5.873801  | S43 | 8.479247  | -1.839973 | -1.483759 |
| H248 | 3.502931  | -1.076766 | 4.887457  | C44 | 10.250373 | -1.481701 | -1.177725 |
| H249 | 8.184712  | 4.399190  | 1.293451  | C45 | 1.961378  | 2.966338  | -5.022978 |
| H250 | 1.398040  | -2.123407 | -7.782453 | C46 | 1.636270  | 3.359671  | -3.574661 |
| H251 | -2.050220 | 7.552558  | -2.675707 | C47 | 2.764867  | 2.915845  | -2.623107 |
| H252 | -7.549133 | 7.793061  | -0.057065 | C48 | 0.268231  | 2.791866  | -3.167874 |
| H253 | -4.765734 | -1.594842 | 3.654013  | C49 | 2.625809  | 3.432737  | -1.186267 |
| H254 | -6.286718 | -1.425706 | 2.796102  | C50 | -5.493179 | 2.293165  | -4.785407 |
| H255 | -4.394614 | -5.798594 | -1.319749 | C51 | -5.563763 | 3.168784  | -3.526185 |
| H256 | -2.939935 | -8.453395 | -3.758968 | C52 | -6.408108 | 2.486240  | -2.440414 |
| H257 | -1.102444 | -0.392272 | -0.935286 | C53 | -4.160054 | 3.499756  | -2.998779 |
| H258 | -0.330237 | -1.072203 | 4.053569  | C54 | -6.747815 | -0.210267 | 0.613380  |
| H259 | 1.095888  | -1.727708 | 4.094198  | N55 | -5.304923 | -0.322115 | 0.708713  |

### TS attack at C1:

|     |           |          |           |     |           |           |           |
|-----|-----------|----------|-----------|-----|-----------|-----------|-----------|
| C1  | -5.967270 | 6.114222 | 0.820263  | C61 | -2.815006 | -0.976670 | -1.727598 |
| C2  | -5.529263 | 6.990567 | -0.342367 | O62 | -3.984144 | -0.546721 | -1.714155 |
| O3  | -4.429200 | 6.830262 | -0.871366 | O63 | -2.042941 | -0.940946 | -0.686351 |
| C4  | -7.421683 | 6.176057 | 1.297960  | C64 | -1.055893 | -1.343905 | -7.501432 |
| C5  | -7.705055 | 5.334995 | 2.551984  | C65 | 0.188783  | -0.979219 | -6.718703 |
| S6  | -7.453392 | 3.517006 | 2.393276  | O66 | 0.223244  | -0.033370 | -5.937462 |
| C7  | -5.770400 | 3.300134 | 3.081089  | N67 | 1.269126  | -1.767127 | -6.991046 |
| N8  | -6.397589 | 7.962122 | -0.730053 | C68 | 2.611501  | -1.476670 | -6.521922 |
| C9  | -6.081842 | 8.901657 | -1.780974 | C69 | 3.249014  | -2.615628 | -5.693817 |
| C10 | -0.922786 | 6.982156 | -0.665305 | C70 | 3.089724  | -2.517197 | -4.160235 |
| C11 | -0.122352 | 7.070872 | -1.957018 | C71 | 3.915823  | -1.357159 | -3.583379 |
| O12 | 1.078965  | 6.810107 | -2.008137 | C72 | 1.623474  | -2.428172 | -3.715077 |
| C13 | -0.761890 | 5.608689 | 0.005247  | C73 | -1.836971 | -6.493768 | -4.286910 |
| C14 | -1.567137 | 5.435069 | 1.306725  | C74 | -3.065370 | -6.409524 | -3.392625 |
| C15 | -1.489916 | 3.977913 | 1.787079  | O75 | -3.485751 | -5.338830 | -2.947552 |



|      |           |           |           |      |           |           |           |
|------|-----------|-----------|-----------|------|-----------|-----------|-----------|
| C76  | -0.554629 | -6.055279 | -3.552986 | H136 | -0.021003 | 3.099141  | -2.158229 |
| C77  | -0.116594 | -6.964206 | -2.387211 | H137 | -0.515363 | 3.133964  | -3.852603 |
| C78  | 0.271976  | -8.375582 | -2.853181 | H138 | 0.272725  | 1.696048  | -3.204074 |
| C79  | 1.042853  | -6.315096 | -1.617360 | H139 | 2.824156  | 1.817222  | -2.620979 |
| N80  | -3.687607 | -7.589522 | -3.127879 | H140 | 3.720649  | 3.270574  | -3.032755 |
| C81  | -5.011616 | -7.644992 | -2.528059 | H141 | 2.509633  | 4.521847  | -1.173699 |
| C82  | -5.093728 | -7.621971 | -0.992253 | H142 | 1.750348  | 3.005943  | -0.684518 |
| O83  | -5.440592 | -8.619564 | -0.366656 | H143 | 3.507642  | 3.176249  | -0.586730 |
| N84  | -4.841206 | -6.411847 | -0.434094 | H144 | 1.939484  | 1.878573  | -5.150600 |
| C85  | -5.119652 | -6.142376 | 0.970303  | H145 | -6.056409 | 4.114601  | -3.798637 |
| C86  | -4.157126 | -5.127199 | 1.592881  | H146 | -6.483850 | 3.105190  | -1.538958 |
| C87  | -2.720115 | -5.681431 | 1.651988  | H147 | -7.425951 | 2.283355  | -2.794124 |
| C88  | -4.689637 | -4.714284 | 2.971261  | H148 | -5.950292 | 1.531856  | -2.154797 |
| C89  | -1.648884 | -4.590736 | 1.695078  | H149 | -4.201652 | 4.208470  | -2.164215 |
| C90  | -2.303025 | -4.162524 | 6.365177  | H150 | -3.537090 | 3.947828  | -3.781437 |
| C91  | -1.632584 | -2.853613 | 5.922427  | H151 | -3.657142 | 2.589365  | -2.651818 |
| C92  | -2.441514 | -2.041011 | 4.896396  | H152 | -5.012115 | 1.334396  | -4.559870 |
| O93  | -3.689865 | -2.068258 | 4.951659  | H153 | -1.217379 | -1.378058 | -3.109291 |
| O94  | -1.777747 | -1.355120 | 4.034286  | H154 | -2.283588 | -2.733240 | -2.764212 |
| O95  | 0.676304  | -0.821514 | 3.628210  | H155 | -2.938501 | -0.355759 | -4.599673 |
| H96  | -7.696004 | 7.210335  | 1.556408  | H156 | -1.124190 | -2.415378 | -7.714451 |
| H97  | -8.093650 | 5.855601  | 0.492633  | H157 | 2.833621  | -3.571367 | -6.041673 |
| H98  | -7.100374 | 5.681792  | 3.396911  | H158 | 4.321566  | -2.651521 | -5.923595 |
| H99  | -8.753580 | 5.458934  | 2.838007  | H159 | 3.511900  | -3.447295 | -3.751995 |
| H100 | -5.705479 | 3.740454  | 4.079403  | H160 | 3.870288  | -1.356314 | -2.489223 |
| H101 | -5.604570 | 2.223409  | 3.165609  | H161 | 3.544284  | -0.383832 | -3.922406 |
| H102 | -5.001574 | 3.726140  | 2.433797  | H162 | 4.969822  | -1.436439 | -3.873470 |
| H103 | -5.717256 | 5.088592  | 0.532289  | H163 | 1.545103  | -2.411024 | -2.622941 |
| H104 | -6.843038 | 8.885653  | -2.568454 | H164 | 1.149671  | -1.515575 | -4.089826 |
| H105 | -1.084772 | 4.837618  | -0.705768 | H165 | 1.043778  | -3.282193 | -4.082793 |
| H106 | 0.303315  | 5.429826  | 0.194478  | H166 | 2.540686  | -0.552215 | -5.946529 |
| H107 | -2.616935 | 5.660432  | 1.069509  | H167 | -0.718764 | -5.040252 | -3.174951 |
| H108 | -2.083287 | 3.823542  | 2.695468  | H168 | 0.262875  | -5.990915 | -4.283572 |
| H109 | -1.858792 | 3.284663  | 1.023397  | H169 | -0.965106 | -7.057154 | -1.693806 |
| H110 | -0.454503 | 3.699226  | 2.020550  | H170 | 0.591661  | -8.992160 | -2.006851 |
| H111 | -1.684060 | 6.232137  | 3.336419  | H171 | -0.557625 | -8.899995 | -3.339211 |
| H112 | -1.226891 | 7.442232  | 2.134812  | H172 | 1.102921  | -8.336046 | -3.568392 |
| H113 | -0.050365 | 6.229234  | 2.659254  | H173 | 1.346184  | -6.931471 | -0.764521 |
| H114 | -0.534046 | 7.768491  | -0.006888 | H174 | 0.761948  | -5.327555 | -1.236665 |
| H115 | -0.528536 | 6.789985  | -5.026058 | H175 | 1.920360  | -6.186685 | -2.263018 |
| H116 | 0.885373  | 0.489451  | 9.136833  | H176 | -1.725003 | -7.497063 | -4.711599 |
| H117 | 4.775796  | 2.197696  | 8.482036  | H177 | -5.592124 | -6.803617 | -2.922867 |
| H118 | 0.657472  | 0.064705  | 6.704939  | H178 | -4.150715 | -4.233770 | 0.948043  |
| H119 | 4.533782  | 1.783123  | 6.040961  | H179 | -5.695592 | -4.286028 | 2.891489  |
| H120 | 1.692273  | 0.237400  | 4.585132  | H180 | -4.063923 | -3.968023 | 3.463398  |
| H121 | 3.538528  | -5.125074 | 5.031729  | H181 | -4.757270 | -5.586235 | 3.633703  |
| H122 | 4.595847  | -4.209908 | 6.112542  | H182 | -2.544575 | -6.308952 | 0.769790  |
| H123 | 1.578926  | -4.684446 | 6.536425  | H183 | -2.627513 | -6.343567 | 2.523865  |
| H124 | 8.217422  | 3.341039  | 2.684536  | H184 | -1.701010 | -3.987963 | 0.780802  |
| H125 | 8.253482  | 1.727000  | 3.330529  | H185 | -0.642748 | -5.019206 | 1.761416  |
| H126 | 6.465874  | 2.572028  | 1.000777  | H186 | -1.778865 | -3.911395 | 2.543907  |
| H127 | 5.272639  | 0.431730  | 1.440191  | H187 | -5.068743 | -7.101015 | 1.495015  |
| H128 | 6.453531  | 0.008489  | 2.685064  | H188 | -1.494311 | -2.201398 | 6.796952  |
| H129 | 6.943321  | 0.106908  | 0.986227  | H189 | -0.633532 | -3.039983 | 5.514451  |
| H130 | 5.819566  | 3.753930  | 3.093446  | H190 | -2.380495 | -4.867165 | 5.531249  |
| H131 | 4.613668  | 2.519352  | 2.702515  | H191 | 8.790056  | 1.059635  | -5.585865 |
| H132 | 5.802640  | 2.219336  | 3.973484  | H192 | 9.755589  | -0.388626 | -3.788005 |
| H133 | 9.068526  | 0.799966  | 1.157857  | H193 | 10.377624 | -0.430146 | -0.908445 |
| H134 | 7.901051  | 4.859904  | -1.531240 | H194 | 10.566068 | -2.116136 | -0.346184 |
| H135 | 1.579615  | 4.456113  | -3.514285 | H195 | -7.262408 | -1.111790 | 0.974834  |

|      |           |           |           |
|------|-----------|-----------|-----------|
| H196 | -7.133454 | 0.658858  | 1.159929  |
| H197 | -7.001083 | -0.082650 | -0.439225 |
| H198 | -2.773761 | -0.854912 | 2.664257  |
| C199 | 0.569282  | -1.849175 | 0.885381  |
| C200 | 0.702870  | -0.496861 | 1.440279  |
| O201 | 0.374056  | -1.138044 | -0.349694 |
| C202 | 2.118514  | -0.024442 | 1.317668  |
| C203 | 1.952491  | -2.475235 | 0.927878  |
| C204 | 2.921376  | -1.266822 | 0.831239  |
| H205 | -0.151305 | 0.145173  | 1.605486  |
| H206 | 2.176236  | 0.817219  | 0.620723  |
| H207 | 3.820274  | -1.427645 | 1.429995  |
| H208 | 2.446413  | 0.351342  | 2.290286  |
| H209 | 3.238884  | -1.113270 | -0.201801 |
| H210 | 2.070120  | -3.004719 | 1.878386  |
| H211 | 2.088376  | -3.194052 | 0.115089  |
| H212 | -0.278733 | -2.461100 | 1.183054  |
| H213 | 1.221395  | 3.378075  | -5.718407 |
| H214 | 8.679395  | 1.861192  | -4.009835 |
| H215 | 8.345958  | -1.168247 | -4.491890 |
| H216 | 9.357436  | 5.653479  | -0.892635 |
| H217 | 9.500992  | 4.155067  | -1.841908 |
| H218 | 10.148777 | 1.970143  | 1.866852  |
| H219 | 2.948652  | 1.544544  | 10.047313 |
| H220 | 2.875709  | -5.514845 | 7.417443  |
| H221 | 2.618163  | -3.778019 | 7.648936  |
| H222 | -1.729982 | -4.645287 | 7.163567  |
| H223 | -3.314827 | -3.964580 | 6.726018  |
| H224 | -6.152632 | -5.778857 | 1.075987  |
| H225 | -5.486712 | -8.577072 | -2.836914 |
| H226 | -2.021087 | -5.809373 | -5.122111 |
| H227 | 3.246719  | -1.263425 | -7.391995 |
| H228 | -1.052855 | -0.807631 | -8.457305 |
| H229 | -4.136713 | -1.551009 | -4.078654 |
| H230 | -2.833340 | -0.654275 | 0.886799  |
| H231 | -4.762099 | -0.319097 | -0.177629 |
| H232 | -0.523453 | 8.560356  | -4.829948 |
| H233 | 0.846132  | 7.586339  | -4.232576 |
| H234 | -5.999173 | 9.924654  | -1.395365 |
| H235 | -5.123337 | 8.606793  | -2.207193 |
| H236 | -5.292080 | 6.364265  | 1.649964  |
| H237 | 7.242728  | 1.119532  | -4.730685 |
| H238 | 10.865501 | -1.716863 | -2.049480 |
| H239 | 8.271879  | 0.515853  | -1.930572 |
| H240 | 6.929639  | -0.433942 | -2.591859 |
| H241 | -1.984767 | 7.189751  | -0.833634 |
| H242 | -1.934918 | -1.029304 | -6.940879 |
| H243 | -6.493199 | 2.079969  | -5.180800 |
| H244 | -4.915193 | 2.779830  | -5.579062 |
| H245 | -2.748049 | -2.058316 | -5.059320 |
| H246 | 2.948320  | 3.335124  | -5.327195 |
| H247 | 4.729471  | -1.979245 | 5.738682  |
| H248 | 3.599028  | -1.054092 | 4.807408  |
| H249 | 8.408056  | 4.243203  | 0.909422  |
| H250 | 1.160453  | -2.499505 | -7.676761 |
| H251 | -1.834107 | 7.575473  | -2.951006 |
| H252 | -7.286375 | 8.038054  | -0.262738 |
| H253 | -4.717560 | -1.073510 | 3.807457  |
| H254 | -6.246179 | -0.775138 | 3.036915  |
| H255 | -4.563293 | -5.658481 | -1.056397 |

|      |           |           |           |
|------|-----------|-----------|-----------|
| H256 | -3.297816 | -8.442188 | -3.497691 |
| H257 | -0.684006 | -1.076704 | -0.575914 |
| H258 | -0.296137 | -1.043858 | 3.872307  |
| H259 | 1.180157  | -1.652548 | 3.814824  |

**TS attack at C2:**

|     |            |           |           |
|-----|------------|-----------|-----------|
| C1  | 6.090142   | -6.016298 | 0.687406  |
| C2  | 5.644962   | -6.881880 | -0.480922 |
| O3  | 4.547195   | -6.709424 | -1.011058 |
| C4  | 7.551144   | -6.073973 | 1.145721  |
| C5  | 7.846887   | -5.242375 | 2.403112  |
| S6  | 7.583234   | -3.424574 | 2.264087  |
| C7  | 5.909771   | -3.224137 | 2.979402  |
| N8  | 6.506697   | -7.857531 | -0.873553 |
| C9  | 6.184521   | -8.791932 | -1.927226 |
| C10 | 1.027218   | -6.936256 | -0.700945 |
| C11 | 0.199653   | -7.057388 | -1.972507 |
| O12 | -1.013328  | -6.851354 | -1.992158 |
| C13 | 0.874297   | -5.543965 | -0.065874 |
| C14 | 1.710110   | -5.329510 | 1.209888  |
| C15 | 1.637330   | -3.859591 | 1.650403  |
| C16 | 1.283356   | -6.256139 | 2.358419  |
| N17 | 0.900177   | -7.432358 | -3.083900 |
| C18 | 0.274147   | -7.560207 | -4.385818 |
| C19 | -2.616454  | -1.399376 | 9.042884  |
| C20 | -1.537095  | -0.709048 | 8.484658  |
| C21 | -3.590808  | -1.927864 | 8.191463  |
| C22 | -1.433070  | -0.527949 | 7.102634  |
| C23 | -3.498612  | -1.758399 | 6.810692  |
| C24 | -2.421827  | -1.050450 | 6.260305  |
| O25 | -2.426543  | -0.863166 | 4.902037  |
| C26 | -2.475732  | 4.560451  | 6.992007  |
| C27 | -3.646093  | 3.877688  | 6.281524  |
| C28 | -3.166411  | 2.706189  | 5.441285  |
| N29 | -3.995730  | 1.651106  | 5.308713  |
| O30 | -2.062311  | 2.761071  | 4.876877  |
| C31 | -9.072602  | -1.941430 | 1.580509  |
| C32 | -9.158828  | -2.641943 | 0.245199  |
| O33 | -9.593423  | -2.081229 | -0.761797 |
| C34 | -7.891776  | -2.285327 | 2.506662  |
| C35 | -6.482536  | -2.044475 | 1.927958  |
| C36 | -6.267255  | -0.584447 | 1.504794  |
| C37 | -5.414815  | -2.481047 | 2.941224  |
| N38 | -8.786383  | -3.945864 | 0.256715  |
| C39 | -8.824269  | -4.748345 | -0.935227 |
| C40 | -8.364524  | -1.052184 | -4.421496 |
| C41 | -9.023573  | 0.202963  | -3.837063 |
| C42 | -8.405997  | 0.583273  | -2.489517 |
| S43 | -9.191946  | 2.006553  | -1.630502 |
| C44 | -10.813291 | 1.272844  | -1.196189 |
| C45 | -1.989050  | -2.936656 | -4.983445 |
| C46 | -1.733996  | -3.365623 | -3.531135 |
| C47 | -2.999119  | -3.170365 | -2.671799 |
| C48 | -0.517948  | -2.618296 | -2.964209 |
| C49 | -2.902068  | -3.743515 | -1.252723 |
| C50 | 5.460599   | -2.178819 | -4.891681 |
| C51 | 5.552344   | -3.040691 | -3.624395 |

|      |           |           |           |      |           |           |           |
|------|-----------|-----------|-----------|------|-----------|-----------|-----------|
| C52  | 6.452463  | -2.366777 | -2.578820 | H112 | 1.398529  | -7.314115 | 2.102278  |
| C53  | 4.159972  | -3.324455 | -3.041504 | H113 | 0.231630  | -6.090150 | 2.622795  |
| C54  | 6.794193  | 0.317511  | 0.491446  | H114 | 0.654597  | -7.704892 | -0.013592 |
| N55  | 5.351018  | 0.380253  | 0.627352  | H115 | 0.508797  | -6.711663 | -5.040527 |
| C56  | 4.694551  | 0.563159  | 1.781182  | H116 | -0.763954 | -0.298577 | 9.128181  |
| N57  | 5.348593  | 0.664751  | 2.965022  | H117 | -4.431411 | -2.479613 | 8.603280  |
| N58  | 3.364982  | 0.591653  | 1.780562  | H118 | -0.596991 | 0.020237  | 6.677227  |
| C59  | 3.008769  | 1.471066  | -4.301881 | H119 | -4.247455 | -2.172856 | 6.142897  |
| C60  | 2.272654  | 1.747952  | -2.987294 | H120 | -1.607644 | -0.423966 | 4.570686  |
| C61  | 2.851128  | 1.042225  | -1.760747 | H121 | -4.137796 | 4.584807  | 5.600437  |
| O62  | 4.016156  | 0.600215  | -1.786937 | H122 | -4.410011 | 3.549390  | 6.995335  |
| O63  | 2.110181  | 1.000573  | -0.697629 | H123 | -1.720495 | 4.867085  | 6.266763  |
| C64  | 0.928736  | 1.417731  | -7.503504 | H124 | -7.965689 | -3.329084 | 2.846964  |
| C65  | -0.282028 | 1.074547  | -6.661037 | H125 | -8.003122 | -1.685435 | 3.420181  |
| O66  | -0.259285 | 0.193559  | -5.806887 | H126 | -6.370854 | -2.672024 | 1.032175  |
| N67  | -1.394362 | 1.807219  | -6.959805 | H127 | -5.252511 | -0.447977 | 1.118904  |
| C68  | -2.719636 | 1.504476  | -6.450548 | H128 | -6.393502 | 0.093587  | 2.358749  |
| C69  | -3.351501 | 2.627548  | -5.593832 | H129 | -6.961270 | -0.267130 | 0.721427  |
| C70  | -3.191822 | 2.493531  | -4.062548 | H130 | -5.538425 | -3.530585 | 3.231483  |
| C71  | -4.012612 | 1.317602  | -3.509975 | H131 | -4.405425 | -2.365121 | 2.535328  |
| C72  | -1.724760 | 2.401252  | -3.621798 | H132 | -5.471195 | -1.874363 | 3.853434  |
| C73  | 1.715070  | 6.563487  | -4.283689 | H133 | -9.087746 | -0.870655 | 1.363951  |
| C74  | 2.972504  | 6.489212  | -3.428497 | H134 | -7.823388 | -4.915397 | -1.352402 |
| O75  | 3.430450  | 5.421255  | -3.015823 | H135 | -1.505993 | -4.441354 | -3.521564 |
| C76  | 0.500513  | 5.922130  | -3.589550 | H136 | -0.273541 | -2.942894 | -1.948221 |
| C77  | 0.008638  | 6.645445  | -2.319089 | H137 | 0.368507  | -2.783745 | -3.585672 |
| C78  | -0.538426 | 8.050225  | -2.615123 | H138 | -0.699189 | -1.536837 | -2.945912 |
| C79  | -1.050569 | 5.796058  | -1.601588 | H139 | -3.242422 | -2.097649 | -2.627350 |
| N80  | 3.583699  | 7.677264  | -3.173985 | H140 | -3.843123 | -3.648919 | -3.187079 |
| C81  | 4.910876  | 7.744150  | -2.583662 | H141 | -2.612746 | -4.799490 | -1.278009 |
| C82  | 4.976033  | 7.719620  | -1.048780 | H142 | -2.157547 | -3.213004 | -0.649217 |
| O83  | 5.136095  | 8.750926  | -0.402788 | H143 | -3.862098 | -3.661834 | -0.729315 |
| N84  | 4.907724  | 6.475148  | -0.514210 | H144 | -2.155575 | -1.855876 | -5.052476 |
| C85  | 5.105913  | 6.229065  | 0.905541  | H145 | 6.008366  | -4.003410 | -3.901066 |
| C86  | 4.195970  | 5.129937  | 1.469687  | H146 | 6.526473  | -2.964597 | -1.663135 |
| C87  | 2.712743  | 5.522363  | 1.345349  | H147 | 7.468123  | -2.213753 | -2.962702 |
| C88  | 4.625095  | 4.834769  | 2.913428  | H148 | 6.039628  | -1.387468 | -2.309769 |
| C89  | 1.732045  | 4.368412  | 1.564502  | H149 | 4.211855  | -4.044106 | -2.216927 |
| C90  | 2.420393  | 4.195678  | 6.347155  | H150 | 3.488331  | -3.740465 | -3.801324 |
| C91  | 1.756660  | 2.876960  | 5.919965  | H151 | 3.708778  | -2.399249 | -2.664078 |
| C92  | 2.541518  | 2.068336  | 4.870714  | H152 | 5.006388  | -1.207738 | -4.663041 |
| O93  | 3.790471  | 2.119063  | 4.879881  | H153 | 1.209183  | 1.500065  | -3.069449 |
| O94  | 1.859719  | 1.353735  | 4.045241  | H154 | 2.327720  | 2.821814  | -2.758879 |
| O95  | -0.614184 | 0.846958  | 3.657296  | H155 | 2.808052  | 0.457097  | -4.660131 |
| H96  | 7.835106  | -7.108707 | 1.392096  | H156 | 0.919893  | 2.450384  | -7.866237 |
| H97  | 8.210448  | -5.743631 | 0.334074  | H157 | -2.931369 | 3.588589  | -5.919440 |
| H98  | 7.255377  | -5.599707 | 3.252950  | H158 | -4.424170 | 2.672811  | -5.821914 |
| H99  | 8.899779  | -5.363400 | 2.673996  | H159 | -3.617643 | 3.412995  | -3.633931 |
| H100 | 5.862551  | -3.674508 | 3.974250  | H160 | -3.963739 | 1.289530  | -2.416149 |
| H101 | 5.739224  | -2.149300 | 3.076842  | H161 | -3.638360 | 0.353760  | -3.872906 |
| H102 | 5.133740  | -3.648445 | 2.339578  | H162 | -5.068117 | 1.397233  | -3.795228 |
| H103 | 5.829747  | -4.989291 | 0.414050  | H163 | -1.640332 | 2.361370  | -2.530933 |
| H104 | 6.980288  | -8.825892 | -2.678597 | H164 | -1.246107 | 1.501964  | -4.020999 |
| H105 | 1.174878  | -4.791149 | -0.805846 | H165 | -1.151599 | 3.266809  | -3.971619 |
| H106 | -0.187389 | -5.366975 | 0.144690  | H166 | -2.624515 | 0.576298  | -5.884236 |
| H107 | 2.754740  | -5.556795 | 0.952595  | H167 | 0.769936  | 4.891986  | -3.333590 |
| H108 | 2.251349  | -3.676403 | 2.539408  | H168 | -0.325815 | 5.863506  | -4.310629 |
| H109 | 1.985236  | -3.186913 | 0.859040  | H169 | 0.865955  | 6.751096  | -1.638307 |
| H110 | 0.606648  | -3.578285 | 1.900960  | H170 | -0.885415 | 8.536175  | -1.697311 |
| H111 | 1.882117  | -6.069267 | 3.257142  | H171 | 0.214474  | 8.707502  | -3.062818 |

|      |            |           |           |      |            |           |           |
|------|------------|-----------|-----------|------|------------|-----------|-----------|
| H172 | -1.388825  | 7.999918  | -3.306425 | H232 | 0.594304   | -8.483357 | -4.880144 |
| H173 | -1.387960  | 6.284095  | -0.680635 | H233 | -0.804252  | -7.588826 | -4.227799 |
| H174 | -0.658230  | 4.807848  | -1.340281 | H234 | 6.027948   | -9.804969 | -1.537400 |
| H175 | -1.930828  | 5.646370  | -2.238686 | H235 | 5.262950   | -8.451291 | -2.398659 |
| H176 | 1.501299   | 7.596149  | -4.579854 | H236 | 5.427256   | -6.280412 | 1.522790  |
| H177 | 5.496892   | 6.912167  | -2.987468 | H237 | -7.290516  | -0.902871 | -4.582593 |
| H178 | 4.357990   | 4.219776  | 0.869836  | H238 | -11.477956 | 1.220683  | -2.061893 |
| H179 | 5.704823   | 4.650057  | 2.964947  | H239 | -8.434227  | -0.273419 | -1.810552 |
| H180 | 4.138324   | 3.958253  | 3.344381  | H240 | -7.359049  | 0.880713  | -2.617755 |
| H181 | 4.413434   | 5.693577  | 3.562570  | H241 | 2.086238   | -7.144371 | -0.887694 |
| H182 | 2.544519   | 5.940394  | 0.345552  | H242 | 1.833899   | 1.246819  | -6.922470 |
| H183 | 2.502755   | 6.333652  | 2.056624  | H243 | 6.451740   | -1.991676 | -5.321239 |
| H184 | 1.900624   | 3.569949  | 0.832490  | H244 | 4.847611   | -2.662759 | -5.660404 |
| H185 | 0.698545   | 4.714859  | 1.452007  | H245 | 2.686402   | 2.178450  | -5.071205 |
| H186 | 1.830540   | 3.933311  | 2.564009  | H246 | -2.862192  | -3.448299 | -5.405570 |
| H187 | 4.934198   | 7.179870  | 1.419201  | H247 | -4.807458  | 1.571125  | 5.901018  |
| H188 | 1.653169   | 2.222101  | 6.797472  | H248 | -3.629717  | 0.793151  | 4.898245  |
| H189 | 0.741655   | 3.049971  | 5.547232  | H249 | -8.389072  | -4.333210 | 1.097483  |
| H190 | 2.463555   | 4.903728  | 5.513677  | H250 | -1.322688  | 2.491735  | -7.697568 |
| H191 | -8.810358  | -1.323246 | -5.384331 | H251 | 1.905925   | -7.476586 | -3.015249 |
| H192 | -10.095404 | 0.015201  | -3.706035 | H252 | 7.389530   | -7.949422 | -0.397978 |
| H193 | -10.673917 | 0.272078  | -0.779986 | H253 | 4.819900   | 1.113894  | 3.736204  |
| H194 | -11.267061 | 1.924105  | -0.445470 | H254 | 6.337045   | 0.860698  | 2.931561  |
| H195 | 7.288689   | 1.231674  | 0.849098  | H255 | 4.693060   | 5.707474  | -1.142186 |
| H196 | 7.222604   | -0.544260 | 1.017366  | H256 | 3.154558   | 8.532373  | -3.490360 |
| H197 | 7.021585   | 0.209954  | -0.569252 | H257 | 0.754912   | 1.212256  | -0.543834 |
| H198 | 2.856226   | 0.810212  | 2.651830  | H258 | 0.359440   | 1.019776  | 3.921154  |
| C199 | -0.504699  | 1.612998  | 1.614806  | H259 | -1.131331  | 1.560682  | 4.104655  |
| C200 | -0.649120  | 0.417502  | 0.769998  |      |            |           |           |
| O201 | -0.288940  | 1.308281  | -0.299260 |      |            |           |           |
| C202 | -2.135770  | 0.106456  | 0.728285  |      |            |           |           |
| C203 | -1.773237  | 2.412804  | 1.574635  |      |            |           |           |
| C204 | -2.815914  | 1.493404  | 0.875230  |      |            |           |           |
| H205 | 0.039682   | -0.418268 | 0.898318  |      |            |           |           |
| H206 | -2.412563  | -0.414217 | -0.192003 |      |            |           |           |
| H207 | -3.743927  | 1.432002  | 1.448249  |      |            |           |           |
| H208 | -2.373603  | -0.544375 | 1.576867  |      |            |           |           |
| H209 | -3.064476  | 1.898748  | -0.107451 |      |            |           |           |
| H210 | -2.058848  | 2.707725  | 2.586266  |      |            |           |           |
| H211 | -1.596897  | 3.340434  | 1.021724  |      |            |           |           |
| H212 | 0.462983   | 2.001851  | 1.898733  |      |            |           |           |
| H213 | -1.125949  | -3.160625 | -5.619548 |      |            |           |           |
| H214 | -8.485636  | -1.901774 | -3.741353 |      |            |           |           |
| H215 | -8.935808  | 1.045399  | -4.533729 |      |            |           |           |
| H216 | -9.281247  | -5.722864 | -0.734158 |      |            |           |           |
| H217 | -9.423904  | -4.219085 | -1.675415 |      |            |           |           |
| H218 | -10.011454 | -2.151702 | 2.111439  |      |            |           |           |
| H219 | -2.689461  | -1.532166 | 10.117377 |      |            |           |           |
| H220 | -2.819881  | 5.443372  | 7.537729  |      |            |           |           |
| H221 | -2.000014  | 3.882647  | 7.706679  |      |            |           |           |
| H222 | 1.862061   | 4.666509  | 7.162636  |      |            |           |           |
| H223 | 3.445005   | 4.012696  | 6.678697  |      |            |           |           |
| H224 | 6.155642   | 5.955348  | 1.085745  |      |            |           |           |
| H225 | 5.372536   | 8.684045  | -2.890479 |      |            |           |           |
| H226 | 1.937834   | 6.008775  | -5.202555 |      |            |           |           |
| H227 | -3.374524  | 1.291922  | -7.305424 |      |            |           |           |
| H228 | 0.958932   | 0.752807  | -8.374152 |      |            |           |           |
| H229 | 4.086764   | 1.578966  | -4.162260 |      |            |           |           |
| H230 | 2.879239   | 0.636820  | 0.873849  |      |            |           |           |
| H231 | 4.789679   | 0.367277  | -0.248147 |      |            |           |           |

## 4.2 Mutant *R1*

The following atoms were kept fixed in the geometry optimizations of reactant and transition state structures: 1, 9, 10, 18, 19, 26, 31, 37, 38, 43, 45, 49, 54, 59, 63, 68, 76, 80, 85.

| Reactant: |           |           |           | N52  | -5.329084 | -1.097368 | 2.997304  |
|-----------|-----------|-----------|-----------|------|-----------|-----------|-----------|
| C1        | -6.258881 | 5.777116  | 0.974202  | N53  | -3.341968 | -0.754300 | 1.881025  |
| C2        | -5.858379 | 6.691173  | -0.173524 | C54  | -3.021001 | -1.433554 | -4.314542 |
| O3        | -4.766554 | 6.566087  | -0.730519 | C55  | -2.082737 | -0.873454 | -3.240531 |
| C4        | -7.726234 | 5.736003  | 1.412951  | C56  | -2.787105 | -0.570566 | -1.933034 |
| C5        | -7.991970 | 4.838092  | 2.630877  | O57  | -3.998574 | -0.426787 | -1.837938 |
| S6        | -7.641100 | 3.042288  | 2.413747  | O58  | -2.032062 | -0.436123 | -0.837110 |
| C7        | -5.986213 | 2.877706  | 3.180421  | C59  | -0.985665 | -1.204783 | -7.537094 |
| N8        | -6.749385 | 7.659169  | -0.514080 | C60  | 0.235907  | -0.801662 | -6.738093 |
| C9        | -6.470399 | 8.638736  | -1.538913 | O61  | 0.192692  | 0.031277  | -5.834796 |
| C10       | -1.244338 | 6.898296  | -0.441546 | N62  | 1.366802  | -1.464613 | -7.102386 |
| C11       | -0.439849 | 7.109309  | -1.712996 | C63  | 2.677169  | -1.217843 | -6.531940 |
| O12       | 0.785688  | 6.981962  | -1.747177 | C64  | 3.274536  | -2.414045 | -5.749728 |
| C13       | -1.001308 | 5.495567  | 0.144679  | C65  | 3.162195  | -2.342111 | -4.210339 |
| C14       | -1.833403 | 5.180809  | 1.401636  | C66  | 4.031294  | -1.214057 | -3.633027 |
| C15       | -1.670194 | 3.703261  | 1.789642  | C67  | 1.709448  | -2.229421 | -3.726599 |
| C16       | -1.477395 | 6.090428  | 2.587313  | C68  | -1.575673 | -6.481922 | -4.492750 |
| N17       | -1.167916 | 7.460676  | -2.811604 | C69  | -2.851518 | -6.463310 | -3.662472 |
| C18       | -0.558638 | 7.673823  | -4.110754 | O70  | -3.379440 | -5.414524 | -3.284180 |
| C19       | 2.690561  | 1.135573  | 9.054937  | C71  | -0.391301 | -5.844889 | -3.742100 |
| C20       | 1.644449  | 0.390278  | 8.505117  | C72  | 0.126560  | -6.642327 | -2.527666 |
| C21       | 3.607784  | 1.749244  | 8.198663  | C73  | 0.756859  | -7.983752 | -2.931659 |
| C22       | 1.517522  | 0.241692  | 7.123342  | C74  | 1.129152  | -5.799664 | -1.726139 |
| C23       | 3.491582  | 1.612851  | 6.816412  | N75  | -3.388350 | -7.680221 | -3.380606 |
| C24       | 2.448143  | 0.852345  | 6.268991  | C76  | -4.712220 | -7.817883 | -2.797312 |
| O25       | 2.408640  | 0.703645  | 4.915312  | C77  | -4.780703 | -7.842221 | -1.263830 |
| C26       | 2.700993  | -4.750069 | 6.795608  | O78  | -4.935119 | -8.894028 | -0.650807 |
| C27       | 3.756253  | -4.223213 | 5.812985  | N79  | -4.708942 | -6.618279 | -0.684652 |
| C28       | 3.213775  | -3.030217 | 5.039692  | C80  | -4.906630 | -6.432893 | 0.745578  |
| N29       | 3.906757  | -1.873394 | 5.133455  | C81  | -4.106396 | -5.256560 | 1.319623  |
| O30       | 2.183486  | -3.147720 | 4.362045  | C82  | -2.588419 | -5.478011 | 1.176010  |
| C31       | 9.029198  | 2.134820  | 1.539226  | C83  | -4.536977 | -5.032482 | 2.775037  |
| C32       | 9.116879  | 2.872465  | 0.222033  | C84  | -1.751308 | -4.204541 | 1.330974  |
| O33       | 9.505637  | 2.348181  | -0.822140 | C85  | -2.211880 | -4.511432 | 6.223184  |
| C34       | 7.593900  | 1.942823  | 2.083767  | C86  | -1.747971 | -3.071028 | 5.956446  |
| C35       | 6.709304  | 1.207172  | 1.068386  | C87  | -2.578824 | -2.318197 | 4.903142  |
| N36       | 8.735690  | 4.176272  | 0.294171  | O88  | -3.827619 | -2.458683 | 4.908669  |
| C37       | 8.664171  | 5.019548  | -0.872096 | O89  | -1.941200 | -1.571988 | 4.082333  |
| C38       | 8.269321  | 1.435883  | -4.481593 | O90  | 0.633001  | -0.879797 | 3.928969  |
| C39       | 8.949350  | 0.160076  | -3.970574 | H91  | -8.070995 | 6.741805  | 1.697824  |
| C40       | 8.354887  | -0.295400 | -2.636163 | H92  | -8.356003 | 5.404694  | 0.578634  |
| S41       | 9.181083  | -1.741893 | -1.857090 | H93  | -7.423640 | 5.184207  | 3.500720  |
| C42       | 10.786492 | -0.986272 | -1.401155 | H94  | -9.051187 | 4.898731  | 2.896921  |
| C43       | 1.833590  | 3.144834  | -4.899389 | H95  | -5.990150 | 3.291458  | 4.191899  |
| C44       | 1.521995  | 4.264649  | -3.911771 | H96  | -5.779352 | 1.807096  | 3.247191  |
| C45       | -5.588261 | 2.158807  | -4.744791 | H97  | -5.204605 | 3.353329  | 2.584618  |
| C46       | -5.704243 | 3.160331  | -3.586829 | H98  | -5.933518 | 4.773316  | 0.685596  |
| C47       | -6.642749 | 2.624894  | -2.496338 | H99  | -7.256246 | 8.647028  | -2.301733 |
| C48       | -4.326064 | 3.502994  | -3.003042 | H100 | -1.241916 | 4.750854  | -0.625106 |
| C49       | -6.775981 | -0.564327 | 0.562000  | H101 | 0.067478  | 5.379738  | 0.361456  |
| N50       | -5.330876 | -0.565079 | 0.709518  | H102 | -2.888313 | 5.350855  | 1.141914  |
| C51       | -4.670490 | -0.821459 | 1.854228  | H103 | -2.281648 | 3.448024  | 2.662266  |
|           |           |           |           | H104 | -1.964342 | 3.040386  | 0.968289  |

|      |           |           |           |      |           |           |           |
|------|-----------|-----------|-----------|------|-----------|-----------|-----------|
| H105 | -0.627161 | 3.478735  | 2.044147  | H165 | -0.684786 | -4.432231 | 1.226314  |
| H106 | -2.074754 | 5.836036  | 3.469978  | H166 | -1.890495 | -3.720920 | 2.301386  |
| H107 | -1.653857 | 7.147811  | 2.365525  | H167 | -4.622030 | -7.370265 | 1.233435  |
| H108 | -0.421299 | 5.978582  | 2.861631  | H168 | -1.823100 | -2.490141 | 6.886474  |
| H109 | -0.912664 | 7.664411  | 0.268991  | H169 | -0.696861 | -3.048670 | 5.653139  |
| H110 | -0.714333 | 6.821214  | -4.783358 | H170 | -2.076048 | -5.140115 | 5.337088  |
| H111 | 0.918118  | -0.088223 | 9.156784  | H171 | 8.699733  | 1.761771  | -5.434550 |
| H112 | 4.421743  | 2.341575  | 8.608549  | H172 | 10.020767 | 0.353183  | -3.843950 |
| H113 | 0.712489  | -0.347523 | 6.695258  | H173 | 10.622056 | -0.001783 | -0.955950 |
| H114 | 4.197244  | 2.089592  | 6.144370  | H174 | 11.256662 | -1.647664 | -0.669701 |
| H115 | 1.588214  | 0.196204  | 4.615918  | H175 | -7.219419 | -1.541389 | 0.796971  |
| H116 | 3.999836  | -5.000636 | 5.080018  | H176 | -7.251898 | 0.201430  | 1.185485  |
| H117 | 4.684357  | -3.967550 | 6.336206  | H177 | -7.003048 | -0.337519 | -0.479947 |
| H118 | 1.781695  | -4.996738 | 6.260007  | H178 | -2.817698 | -1.024444 | 2.745728  |
| H119 | 7.154021  | 2.937633  | 2.258635  | C179 | 0.755971  | -1.415453 | 0.726814  |
| H120 | 6.651185  | 1.750053  | 0.120224  | C180 | 0.748681  | 0.045001  | 0.738482  |
| H121 | 9.495797  | 1.157040  | 1.388636  | O181 | 0.540622  | -0.676620 | -0.529692 |
| H122 | 7.631718  | 5.167053  | -1.212531 | C182 | 2.159721  | 0.557393  | 0.904681  |
| H123 | 1.785003  | 5.237847  | -4.333435 | C183 | 2.174365  | -1.914986 | 0.867761  |
| H124 | 1.528726  | 2.166161  | -4.518988 | C184 | 3.043388  | -0.668454 | 0.557915  |
| H125 | -6.142122 | 4.087570  | -3.986155 | H185 | -0.109629 | 0.625026  | 1.064116  |
| H126 | -6.756348 | 3.341332  | -1.675212 | H186 | 2.370210  | 1.426763  | 0.273975  |
| H127 | -7.640657 | 2.409415  | -2.895278 | H187 | 3.984110  | -0.675209 | 1.113468  |
| H128 | -6.241734 | 1.695806  | -2.073540 | H188 | 2.277987  | 0.857379  | 1.952646  |
| H129 | -4.398879 | 4.273863  | -2.228396 | H189 | 3.290179  | -0.645450 | -0.505855 |
| H130 | -3.646370 | 3.871571  | -3.780056 | H190 | 2.306033  | -2.260871 | 1.898506  |
| H131 | -3.868077 | 2.612752  | -2.555268 | H191 | 2.391763  | -2.758124 | 0.203253  |
| H132 | -5.173143 | 1.207400  | -4.391856 | H192 | -0.092377 | -2.010979 | 1.045999  |
| H133 | -1.613984 | 0.056304  | -3.588798 | H193 | 1.291024  | 3.309555  | -5.836421 |
| H134 | -1.251685 | -1.558704 | -3.039738 | H194 | 8.389655  | 2.249847  | -3.759204 |
| H135 | -3.913390 | -0.811134 | -4.406762 | H195 | 8.862024  | -0.647014 | -4.708112 |
| H136 | -1.365206 | -2.172097 | -7.190311 | H196 | 9.107758  | 5.999934  | -0.670367 |
| H137 | 2.796368  | -3.336087 | -6.106793 | H197 | 9.225673  | 4.531390  | -1.668647 |
| H138 | 4.336738  | -2.502914 | -6.009353 | H198 | 9.628740  | 2.670980  | 2.287174  |
| H139 | 3.571459  | -3.290619 | -3.832923 | H199 | 2.783059  | 1.243667  | 10.131177 |
| H140 | 4.041714  | -1.253374 | -2.539381 | H200 | 3.061495  | -5.648007 | 7.305514  |
| H141 | 3.656521  | -0.223705 | -3.914610 | H201 | 2.462053  | -3.999969 | 7.555948  |
| H142 | 5.068395  | -1.293529 | -3.978926 | H202 | -1.642843 | -4.959482 | 7.044093  |
| H143 | 1.662775  | -2.193656 | -2.633501 | H203 | -3.273526 | -4.524009 | 6.481742  |
| H144 | 1.236948  | -1.316865 | -4.101977 | H204 | -5.976062 | -6.281923 | 0.953415  |
| H145 | 1.112969  | -3.084240 | -4.065587 | H205 | -5.138846 | -8.764430 | -3.133672 |
| H146 | 2.571300  | -0.336880 | -5.896582 | H206 | -1.789356 | -5.892417 | -5.391457 |
| H147 | -0.710088 | -4.850036 | -3.411299 | H207 | 3.356249  | -0.941344 | -7.347999 |
| H148 | 0.435348  | -5.694162 | -4.449222 | H208 | -0.764353 | -1.296890 | -8.605464 |
| H149 | -0.730145 | -6.853600 | -1.870847 | H209 | -3.336369 | -2.452484 | -4.070926 |
| H150 | 1.113319  | -8.528070 | -2.051230 | H210 | -2.842417 | -0.577985 | 1.017328  |
| H151 | 0.052440  | -8.640091 | -3.453770 | H211 | -4.779163 | -0.423433 | -0.141790 |
| H152 | 1.616336  | -7.825620 | -3.594809 | H212 | -0.967279 | 8.572387  | -4.583724 |
| H153 | 1.483974  | -6.341949 | -0.843619 | H213 | 0.512527  | 7.802912  | -3.954281 |
| H154 | 0.678678  | -4.861544 | -1.386071 | H214 | -6.380479 | 9.647281  | -1.118573 |
| H155 | 2.005866  | -5.547249 | -2.335207 | H215 | -5.524184 | 8.365750  | -2.005155 |
| H156 | -1.334231 | -7.496753 | -4.826132 | H216 | -5.623803 | 6.065867  | 1.823114  |
| H157 | -5.326186 | -6.995624 | -3.178109 | H217 | 7.194821  | 1.283120  | -4.636541 |
| H158 | -4.372831 | -4.357492 | 0.739074  | H218 | 11.448904 | -0.891523 | -2.265034 |
| H159 | -5.614232 | -4.840468 | 2.842140  | H219 | 8.376713  | 0.526380  | -1.915388 |
| H160 | -4.028913 | -4.189165 | 3.245079  | H220 | 7.311644  | -0.605144 | -2.764945 |
| H161 | -4.327114 | -5.924896 | 3.377458  | H221 | -2.316146 | 7.045686  | -0.612549 |
| H162 | -2.386387 | -5.912791 | 0.189388  | H222 | -1.765894 | -0.456760 | -7.397670 |
| H163 | -2.269069 | -6.228655 | 1.912139  | H223 | -6.567059 | 1.948557  | -5.190882 |
| H164 | -2.016396 | -3.473756 | 0.557378  | H224 | -4.932877 | 2.537373  | -5.536927 |

|      |           |           |           |     |           |           |           |
|------|-----------|-----------|-----------|-----|-----------|-----------|-----------|
| H225 | -2.506129 | -1.445375 | -5.275222 | N29 | 3.876600  | -2.104962 | 5.048465  |
| H226 | 2.903266  | 3.109955  | -5.130656 | O30 | 2.090301  | -3.190651 | 4.151482  |
| H227 | 4.646702  | -1.786706 | 5.812048  | C31 | 9.047556  | 2.106840  | 1.541582  |
| H228 | 3.483257  | -1.004065 | 4.808917  | C32 | 9.128031  | 2.863966  | 0.235239  |
| H229 | 8.369456  | 4.522101  | 1.167693  | O33 | 9.500541  | 2.351563  | -0.820551 |
| H230 | 1.302982  | -2.125123 | -7.862792 | C34 | 7.611946  | 1.861744  | 2.063955  |
| H231 | -2.173958 | 7.460380  | -2.732583 | C35 | 6.761815  | 1.116296  | 1.026308  |
| H232 | -7.624426 | 7.713412  | -0.018392 | N36 | 8.754574  | 4.168149  | 0.330024  |
| H233 | -4.785365 | -1.551066 | 3.771409  | C37 | 8.686394  | 5.031157  | -0.822165 |
| H234 | -6.305178 | -1.338895 | 2.928466  | C38 | 8.270756  | 1.507315  | -4.487791 |
| H235 | -4.540389 | -5.819745 | -1.286815 | C39 | 8.906733  | 0.206744  | -3.982122 |
| H236 | -2.900137 | -8.514479 | -3.666015 | C40 | 8.288752  | -0.237862 | -2.654677 |
| H237 | -1.037294 | -0.571474 | -0.938943 | S41 | 9.061134  | -1.714144 | -1.876063 |
| H238 | -0.322503 | -1.112269 | 4.066895  | C42 | 10.692365 | -1.019077 | -1.415390 |
| H239 | 1.132063  | -1.719665 | 3.983281  | C43 | 1.839815  | 3.244142  | -4.862143 |
| C240 | 7.653575  | 1.227087  | 3.447870  | C44 | 1.511903  | 4.330690  | -3.843259 |
| H241 | 8.029786  | 0.205731  | 3.296994  | C45 | -5.584913 | 2.280429  | -4.705039 |
| H242 | 8.397383  | 1.734274  | 4.077197  | C46 | -5.682249 | 3.165043  | -3.453682 |
| H243 | 7.109373  | 0.209064  | 0.854819  | C47 | -6.659099 | 2.559763  | -2.435737 |
| S244 | 2.478981  | 4.046238  | -2.345369 | C48 | -4.301631 | 3.384589  | -2.818178 |
| H245 | 2.026952  | 5.178330  | -1.761268 | C49 | -6.768931 | -0.523704 | 0.560235  |
| H246 | 0.456383  | 4.276123  | -3.667852 | N50 | -5.326172 | -0.643400 | 0.637898  |
| C247 | 6.320539  | 1.183414  | 4.200502  | C51 | -4.637705 | -0.872745 | 1.764189  |
| H248 | 5.915612  | 2.192183  | 4.340630  | N52 | -5.259599 | -1.008426 | 2.961816  |
| H249 | 5.562049  | 0.597744  | 3.673505  | N53 | -3.310020 | -0.922445 | 1.721673  |
| H250 | 6.447582  | 0.740561  | 5.193854  | C54 | -3.028714 | -1.326897 | -4.338923 |
| H251 | 5.687874  | 1.092866  | 1.440501  | C55 | -2.089974 | -0.897740 | -3.203822 |

### TS attack at C1:

|     |           |           |           |     |           |           |           |
|-----|-----------|-----------|-----------|-----|-----------|-----------|-----------|
| C1  | -6.229512 | 5.808539  | 1.072998  | C56 | -2.768653 | -0.778418 | -1.839645 |
| C2  | -5.823541 | 6.746953  | -0.052304 | O57 | -3.992864 | -0.551749 | -1.781675 |
| O3  | -4.724809 | 6.637651  | -0.598113 | O58 | -2.027322 | -0.905641 | -0.783714 |
| C4  | -7.679528 | 5.815123  | 1.566315  | C59 | -1.000430 | -1.053115 | -7.562411 |
| C5  | -7.931912 | 4.904246  | 2.777655  | C60 | 0.245420  | -0.606898 | -6.823620 |
| S6  | -7.639324 | 3.103068  | 2.520641  | O61 | 0.263602  | 0.367644  | -6.077201 |
| C7  | -5.958582 | 2.887061  | 3.214453  | N62 | 1.331745  | -1.399409 | -7.051539 |
| N8  | -6.718755 | 7.713545  | -0.386763 | C63 | 2.664763  | -1.094506 | -6.566666 |
| C9  | -6.437490 | 8.710878  | -1.393280 | C64 | 3.286747  | -2.190851 | -5.673926 |
| C10 | -1.214669 | 6.935662  | -0.336959 | C65 | 3.075971  | -2.034958 | -4.151943 |
| C11 | -0.411537 | 7.164335  | -1.606608 | C66 | 3.853843  | -0.833111 | -3.593807 |
| O12 | 0.814514  | 7.040957  | -1.643468 | C67 | 1.594916  | -1.964220 | -3.757557 |
| C13 | -0.966033 | 5.530156  | 0.238886  | C68 | -1.600808 | -6.376523 | -4.601803 |
| C14 | -1.799141 | 5.204622  | 1.492507  | C69 | -2.872576 | -6.372981 | -3.764526 |
| C15 | -1.622590 | 3.728101  | 1.878124  | O70 | -3.391933 | -5.332428 | -3.356650 |
| C16 | -1.458003 | 6.115713  | 2.681346  | C71 | -0.425053 | -5.705586 | -3.868990 |
| N17 | -1.141526 | 7.532288  | -2.698074 | C72 | 0.114866  | -6.475764 | -2.646653 |
| C18 | -0.535252 | 7.767793  | -3.994918 | C73 | 0.767490  | -7.811831 | -3.032893 |
| C19 | 2.723811  | 1.007969  | 9.055933  | C74 | 1.106043  | -5.602599 | -1.864036 |
| C20 | 1.655470  | 0.278211  | 8.529473  | N75 | -3.416198 | -7.593758 | -3.509331 |
| C21 | 3.649984  | 1.582914  | 8.182552  | C76 | -4.737715 | -7.729136 | -2.920292 |
| C22 | 1.515685  | 0.104381  | 7.151069  | C77 | -4.791367 | -7.783520 | -1.386933 |
| C23 | 3.521057  | 1.421195  | 6.804750  | O78 | -4.929493 | -8.848360 | -0.792197 |
| C24 | 2.456501  | 0.674475  | 6.285076  | N79 | -4.730684 | -6.568149 | -0.788396 |
| O25 | 2.416364  | 0.497637  | 4.928180  | C80 | -4.918887 | -6.400643 | 0.644865  |
| C26 | 2.708979  | -4.840593 | 6.702306  | C81 | -4.043602 | -5.292538 | 1.240998  |
| C27 | 3.594242  | -4.495097 | 5.491081  | C82 | -2.547344 | -5.639015 | 1.123934  |
| C28 | 3.127331  | -3.207206 | 4.832945  | C83 | -4.481373 | -5.036629 | 2.688689  |
|     |           |           |           | C84 | -1.615543 | -4.432649 | 1.258774  |
|     |           |           |           | C85 | -2.204435 | -4.576457 | 6.145952  |
|     |           |           |           | C86 | -1.590621 | -3.218365 | 5.774525  |
|     |           |           |           | C87 | -2.432815 | -2.390212 | 4.788451  |
|     |           |           |           | O88 | -3.679144 | -2.471349 | 4.839435  |

|      |           |           |           |      |           |           |           |
|------|-----------|-----------|-----------|------|-----------|-----------|-----------|
| O89  | -1.798402 | -1.638077 | 3.960364  | H149 | -0.734212 | -6.691796 | -1.981499 |
| O90  | 0.626002  | -0.957281 | 3.591023  | H150 | 1.137898  | -8.336318 | -2.145997 |
| H91  | -7.972886 | 6.828167  | 1.881236  | H151 | 0.072316  | -8.488416 | -3.541019 |
| H92  | -8.353052 | 5.522595  | 0.751671  | H152 | 1.620979  | -7.648820 | -3.702668 |
| H93  | -7.325260 | 5.220380  | 3.633023  | H153 | 1.472959  | -6.123219 | -0.973065 |
| H94  | -8.979580 | 4.990216  | 3.080084  | H154 | 0.640461  | -4.665917 | -1.541177 |
| H95  | -5.915382 | 3.267124  | 4.238303  | H155 | 1.976444  | -5.347475 | -2.481185 |
| H96  | -5.764199 | 1.811971  | 3.235628  | H156 | -1.341769 | -7.390180 | -4.925886 |
| H97  | -5.194598 | 3.371459  | 2.603084  | H157 | -5.345114 | -6.893203 | -3.280807 |
| H98  | -5.960843 | 4.802069  | 0.737592  | H158 | -4.225212 | -4.373483 | 0.660735  |
| H99  | -7.206696 | 8.714610  | -2.173030 | H159 | -5.544525 | -4.774140 | 2.737869  |
| H100 | -1.202308 | 4.789199  | -0.535533 | H160 | -3.929158 | -4.223048 | 3.160981  |
| H101 | 0.103166  | 5.417954  | 0.456558  | H161 | -4.339055 | -5.937688 | 3.298291  |
| H102 | -2.854462 | 5.364202  | 1.228445  | H162 | -2.369802 | -6.111975 | 0.150320  |
| H103 | -2.234663 | 3.465891  | 2.748442  | H163 | -2.298743 | -6.395458 | 1.881497  |
| H104 | -1.906999 | 3.063874  | 1.055012  | H164 | -1.810864 | -3.707199 | 0.459905  |
| H105 | -0.577184 | 3.515469  | 2.135321  | H165 | -0.567147 | -4.743997 | 1.187634  |
| H106 | -2.054337 | 5.851398  | 3.561929  | H166 | -1.742375 | -3.909491 | 2.212089  |
| H107 | -1.647785 | 7.171102  | 2.461727  | H167 | -4.698609 | -7.366286 | 1.109978  |
| H108 | -0.400873 | 6.017715  | 2.958011  | H168 | -1.481717 | -2.606951 | 6.682214  |
| H109 | -0.885757 | 7.697575  | 0.379689  | H169 | -0.584743 | -3.340666 | 5.359053  |
| H110 | -0.692587 | 6.926731  | -4.681287 | H170 | -2.252354 | -5.237726 | 5.275218  |
| H111 | 0.921391  | -0.167531 | 9.194909  | H171 | 8.717675  | 1.825867  | -5.435502 |
| H112 | 4.480092  | 2.163997  | 8.574808  | H172 | 9.982906  | 0.364693  | -3.847160 |
| H113 | 0.688471  | -0.471583 | 6.745351  | H173 | 10.563320 | -0.029431 | -0.970125 |
| H114 | 4.230159  | 1.868230  | 6.116314  | H174 | 11.136114 | -1.697863 | -0.683366 |
| H115 | 1.589092  | 0.044019  | 4.615827  | H175 | -7.283163 | -1.430489 | 0.908378  |
| H116 | 3.519186  | -5.287070 | 4.740209  | H176 | -7.147337 | 0.335369  | 1.127954  |
| H117 | 4.644983  | -4.419863 | 5.792262  | H177 | -7.033472 | -0.376578 | -0.487359 |
| H118 | 1.664452  | -4.933962 | 6.395106  | H178 | -2.778616 | -1.162215 | 2.575464  |
| H119 | 7.140711  | 2.839828  | 2.250357  | C179 | 0.728711  | -1.610976 | 0.736468  |
| H120 | 6.695092  | 1.674760  | 0.088052  | C180 | 0.597840  | -0.334652 | 1.450129  |
| H121 | 9.545861  | 1.145906  | 1.383910  | O181 | 0.399679  | -0.818223 | -0.415167 |
| H122 | 7.653130  | 5.204133  | -1.147280 | C182 | 1.889541  | 0.419315  | 1.411460  |
| H123 | 1.740986  | 5.321498  | -4.242849 | C183 | 2.211951  | -1.945520 | 0.738427  |
| H124 | 1.579783  | 2.248065  | -4.495042 | C184 | 2.907213  | -0.559441 | 0.757789  |
| H125 | -6.074866 | 4.145862  | -3.762289 | H185 | -0.365727 | 0.103452  | 1.673469  |
| H126 | -6.755472 | 3.190853  | -1.544888 | H186 | 1.770566  | 1.348309  | 0.844938  |
| H127 | -7.659384 | 2.429897  | -2.865114 | H187 | 3.854056  | -0.588330 | 1.301858  |
| H128 | -6.300596 | 1.576303  | -2.109516 | H188 | 2.157689  | 0.703878  | 2.432881  |
| H129 | -4.353880 | 4.096303  | -1.986648 | H189 | 3.120644  | -0.229825 | -0.260617 |
| H130 | -3.586845 | 3.779340  | -3.549474 | H190 | 2.436759  | -2.522358 | 1.641535  |
| H131 | -3.902714 | 2.436862  | -2.437553 | H191 | 2.487888  | -2.549552 | -0.130137 |
| H132 | -5.208347 | 1.285314  | -4.442567 | H192 | 0.026452  | -2.413657 | 0.950964  |
| H133 | -1.646474 | 0.080556  | -3.433953 | H193 | 1.265000  | 3.402549  | -5.780177 |
| H134 | -1.246763 | -1.588797 | -3.109655 | H194 | 8.412323  | 2.311761  | -3.758638 |
| H135 | -3.893692 | -0.662990 | -4.394446 | H195 | 8.798394  | -0.591844 | -4.725974 |
| H136 | -1.356228 | -2.015141 | -7.179078 | H196 | 9.151919  | 5.999286  | -0.610872 |
| H137 | 2.898902  | -3.166262 | -5.998715 | H197 | 9.228493  | 4.544434  | -1.632806 |
| H138 | 4.366778  | -2.216601 | -5.867486 | H198 | 9.619990  | 2.649646  | 2.305700  |
| H139 | 3.505649  | -2.938666 | -3.694589 | H199 | 2.825763  | 1.134893  | 10.128929 |
| H140 | 3.784134  | -0.800347 | -2.501732 | H200 | 3.024442  | -5.788476 | 7.146669  |
| H141 | 3.459511  | 0.118248  | -3.967283 | H201 | 2.771218  | -4.065770 | 7.472815  |
| H142 | 4.916027  | -0.885500 | -3.859647 | H202 | -1.610867 | -5.076433 | 6.918400  |
| H143 | 1.480478  | -1.907826 | -2.670533 | H203 | -3.223473 | -4.441151 | 6.515271  |
| H144 | 1.114077  | -1.075638 | -4.177205 | H204 | -5.976511 | -6.181880 | 0.853346  |
| H145 | 1.046843  | -2.844135 | -4.112613 | H205 | -5.176134 | -8.664865 | -3.271826 |
| H146 | 2.585726  | -0.143010 | -6.037867 | H206 | -1.833638 | -5.802400 | -5.505898 |
| H147 | -0.762518 | -4.713340 | -3.549868 | H207 | 3.318204  | -0.925488 | -7.432909 |
| H148 | 0.394460  | -5.548506 | -4.583323 | H208 | -0.806395 | -1.171629 | -8.634152 |



|      |           |           |           |     |           |           |           |
|------|-----------|-----------|-----------|-----|-----------|-----------|-----------|
| H209 | -3.395347 | -2.345554 | -4.174860 | C13 | -0.923176 | 5.447459  | 0.347517  |
| H210 | -2.840948 | -0.879235 | 0.805688  | C14 | -1.741278 | 5.077403  | 1.598875  |
| H211 | -4.785976 | -0.569695 | -0.248942 | C15 | -1.610403 | 3.575202  | 1.892923  |
| H212 | -0.945305 | 8.674275  | -4.451336 | C16 | -1.341293 | 5.903201  | 2.830770  |
| H213 | 0.536248  | 7.894415  | -3.838766 | N17 | -1.087902 | 7.546471  | -2.490368 |
| H214 | -6.375465 | 9.715430  | -0.958555 | C18 | -0.494347 | 7.812678  | -3.787152 |
| H215 | -5.476789 | 8.461083  | -1.842729 | C19 | 2.848467  | 0.666828  | 9.034855  |
| H216 | -5.551183 | 6.036030  | 1.906636  | C20 | 1.778788  | -0.041989 | 8.481191  |
| H217 | 7.193136  | 1.389834  | -4.650873 | C21 | 3.755125  | 1.296676  | 8.178052  |
| H218 | 11.359820 | -0.948368 | -2.277642 | C22 | 1.620311  | -0.143313 | 7.096269  |
| H219 | 8.330411  | 0.579242  | -1.929599 | C23 | 3.607443  | 1.207869  | 6.794670  |
| H220 | 7.237415  | -0.514316 | -2.792912 | C24 | 2.543459  | 0.479016  | 6.246983  |
| H221 | -2.286850 | 7.082011  | -0.506004 | O25 | 2.496153  | 0.371529  | 4.881195  |
| H222 | -1.782630 | -0.308111 | -7.421667 | C26 | 2.732615  | -5.115834 | 6.526302  |
| H223 | -6.563666 | 2.152079  | -5.181680 | C27 | 3.816003  | -4.538871 | 5.605690  |
| H224 | -4.903437 | 2.711357  | -5.446980 | C28 | 3.308462  | -3.287881 | 4.910495  |
| H225 | -2.499181 | -1.300973 | -5.292576 | N29 | 4.058682  | -2.172027 | 5.010864  |
| H226 | 2.903817  | 3.254583  | -5.120794 | O30 | 2.241334  | -3.323600 | 4.276428  |
| H227 | 4.651361  | -2.134296 | 5.692033  | C31 | 9.088799  | 1.892418  | 1.470537  |
| H228 | 3.508159  | -1.188031 | 4.798928  | C32 | 9.148495  | 2.680644  | 0.181631  |
| H229 | 8.412616  | 4.508708  | 1.215327  | O33 | 9.488608  | 2.188077  | -0.894157 |
| H230 | 1.232854  | -2.160755 | -7.706918 | C34 | 7.679946  | 1.754784  | 2.094047  |
| H231 | -2.147551 | 7.525565  | -2.618434 | C35 | 6.694081  | 1.124019  | 1.101079  |
| H232 | -7.602708 | 7.747746  | 0.094571  | N36 | 8.806695  | 3.989394  | 0.318235  |
| H233 | -4.711386 | -1.470727 | 3.712853  | C37 | 8.733078  | 4.883217  | -0.809366 |
| H234 | -6.247921 | -1.207332 | 2.948404  | C38 | 8.227989  | 1.464236  | -4.562030 |
| H235 | -4.562097 | -5.760284 | -1.378665 | C39 | 8.859502  | 0.145804  | -4.098452 |
| H236 | -2.935620 | -8.425910 | -3.812939 | C40 | 8.242830  | -0.337968 | -2.784246 |
| H237 | -0.652391 | -0.867906 | -0.647293 | S41 | 9.009197  | -1.843670 | -2.057193 |
| H238 | -0.333875 | -1.240988 | 3.816803  | C42 | 10.648626 | -1.175894 | -1.585178 |
| H239 | 1.159245  | -1.785398 | 3.687061  | C43 | 1.814365  | 3.286243  | -4.805812 |
| C240 | 7.681709  | 1.123829  | 3.415976  | C44 | 1.531761  | 4.386664  | -3.788489 |
| H241 | 8.095259  | 0.119352  | 3.251045  | C45 | -5.618913 | 2.406323  | -4.577494 |
| H242 | 8.399822  | 1.645122  | 4.063194  | C46 | -5.688907 | 3.341775  | -3.361675 |
| H243 | 7.195352  | 0.135729  | 0.797300  | C47 | -6.662436 | 2.792179  | -2.309497 |
| S244 | 2.498501  | 4.106456  | -2.293951 | C48 | -4.297718 | 3.562063  | -2.749839 |
| H245 | 2.052487  | 5.232657  | -1.693717 | C49 | -6.769689 | -0.524035 | 0.626052  |
| H246 | 0.450582  | 4.304310  | -3.582879 | N50 | -5.324260 | -0.605432 | 0.696009  |
| C247 | 6.343835  | 1.018689  | 4.153777  | C51 | -4.626361 | -0.862112 | 1.810627  |
| H248 | 5.900745  | 2.009786  | 4.304977  | N52 | -5.240616 | -1.072212 | 3.001007  |
| H249 | 5.613933  | 0.414120  | 3.607292  | N53 | -3.297310 | -0.860421 | 1.764303  |
| H250 | 6.477038  | 0.563492  | 5.140835  | C54 | -3.102250 | -1.239441 | -4.341259 |
| H251 | 5.740428  | 0.962910  | 1.385087  | C55 | -2.177116 | -0.782426 | -3.204981 |
|      |           |           |           | C56 | -2.857443 | -0.657498 | -1.839700 |
|      |           |           |           | O57 | -4.082111 | -0.433182 | -1.779174 |
|      |           |           |           | O58 | -2.112290 | -0.777548 | -0.786612 |
|      |           |           |           | C59 | -1.112042 | -0.903140 | -7.582514 |
|      |           |           |           | C60 | 0.171847  | -0.432503 | -6.927593 |
|      |           |           |           | O61 | 0.274806  | 0.659358  | -6.376972 |
|      |           |           |           | N62 | 1.200676  | -1.323294 | -7.025148 |
|      |           |           |           | C63 | 2.564771  | -1.014497 | -6.636205 |
|      |           |           |           | C64 | 3.181410  | -2.024879 | -5.646995 |
|      |           |           |           | C65 | 2.992691  | -1.716970 | -4.145215 |
|      |           |           |           | C66 | 3.815032  | -0.492938 | -3.713276 |
|      |           |           |           | C67 | 1.519239  | -1.560393 | -3.745502 |
|      |           |           |           | C68 | -1.739238 | -6.296681 | -4.757508 |
|      |           |           |           | C69 | -2.999545 | -6.301132 | -3.902172 |
|      |           |           |           | O70 | -3.504587 | -5.266349 | -3.462982 |
|      |           |           |           | C71 | -0.580660 | -5.546740 | -4.076415 |
|      |           |           |           | C72 | 0.000733  | -6.235253 | -2.825149 |

### TS attack at C2:

|     |           |          |           |
|-----|-----------|----------|-----------|
| C1  | -6.146921 | 5.785349 | 1.300615  |
| C2  | -5.743395 | 6.750069 | 0.196716  |
| O3  | -4.649718 | 6.648421 | -0.360930 |
| C4  | -7.596976 | 5.780148 | 1.794391  |
| C5  | -7.850522 | 4.846088 | 2.987938  |
| S6  | -7.561127 | 3.049262 | 2.699264  |
| C7  | -5.876321 | 2.820135 | 3.378191  |
| N8  | -6.633868 | 7.731618 | -0.104831 |
| C9  | -6.351056 | 8.755125 | -1.084361 |
| C10 | -1.137138 | 6.890686 | -0.144150 |
| C11 | -0.346100 | 7.162479 | -1.412507 |
| O12 | 0.880827  | 7.051532 | -1.460514 |

|      |           |           |           |      |           |           |           |
|------|-----------|-----------|-----------|------|-----------|-----------|-----------|
| C73  | 0.690308  | -7.568427 | -3.152621 | H133 | -1.750270 | 0.202089  | -3.440995 |
| C74  | 0.972973  | -5.291700 | -2.102156 | H134 | -1.323514 | -1.458709 | -3.098872 |
| N75  | -3.556788 | -7.521752 | -3.678132 | H135 | -3.981256 | -0.594449 | -4.406280 |
| C76  | -4.870652 | -7.656860 | -3.071868 | H136 | -1.363785 | -1.929520 | -7.297780 |
| C77  | -4.890683 | -7.751894 | -1.540213 | H137 | 2.775256  | -3.021844 | -5.868647 |
| O78  | -4.964099 | -8.835406 | -0.968362 | H138 | 4.258011  | -2.087253 | -5.851101 |
| N79  | -4.870387 | -6.548974 | -0.914610 | H139 | 3.397772  | -2.585903 | -3.605583 |
| C80  | -4.990221 | -6.422545 | 0.529553  | H140 | 3.747874  | -0.338960 | -2.631455 |
| C81  | -4.128874 | -5.289666 | 1.106040  | H141 | 3.457194  | 0.427313  | -4.187760 |
| C82  | -2.628162 | -5.548852 | 0.871474  | H142 | 4.874017  | -0.613244 | -3.969269 |
| C83  | -4.477223 | -5.110542 | 2.589301  | H143 | 1.419887  | -1.411250 | -2.665703 |
| C84  | -1.731565 | -4.322248 | 1.071038  | H144 | 1.064009  | -0.695540 | -4.237815 |
| C85  | -2.183922 | -4.778902 | 6.041447  | H145 | 0.936836  | -2.447396 | -4.019735 |
| C86  | -1.560610 | -3.414404 | 5.708681  | H146 | 2.540553  | -0.005674 | -6.220684 |
| C87  | -2.391884 | -2.548467 | 4.744514  | H147 | -0.951752 | -4.553390 | -3.801195 |
| O88  | -3.638751 | -2.602041 | 4.806839  | H148 | 0.223896  | -5.395775 | -4.808964 |
| O89  | -1.747086 | -1.790788 | 3.928119  | H149 | -0.832185 | -6.443060 | -2.137595 |
| O90  | 0.705948  | -1.222871 | 3.549365  | H150 | 1.089746  | -8.034590 | -2.245959 |
| H91  | -7.891069 | 6.786403  | 2.129886  | H151 | 0.008928  | -8.291022 | -3.613836 |
| H92  | -8.270051 | 5.504384  | 0.973627  | H152 | 1.528753  | -7.414381 | -3.843228 |
| H93  | -7.244816 | 5.145747  | 3.849970  | H153 | 1.370369  | -5.756268 | -1.193144 |
| H94  | -8.898445 | 4.927821  | 3.290674  | H154 | 0.481761  | -4.355438 | -1.817944 |
| H95  | -5.827718 | 3.175511  | 4.410631  | H155 | 1.825900  | -5.039493 | -2.744521 |
| H96  | -5.681233 | 1.745044  | 3.372081  | H156 | -1.446386 | -7.314414 | -5.037073 |
| H97  | -5.116644 | 3.320036  | 2.774131  | H157 | -5.474610 | -6.805771 | -3.400568 |
| H98  | -5.877587 | 4.787101  | 0.942202  | H158 | -4.399191 | -4.362172 | 0.575505  |
| H99  | -7.136031 | 8.800001  | -1.846743 | H159 | -5.551037 | -4.934529 | 2.722137  |
| H100 | -1.199432 | 4.759811  | -0.462204 | H160 | -3.956028 | -4.270117 | 3.049363  |
| H101 | 0.146025  | 5.289859  | 0.535210  | H161 | -4.223274 | -6.014720 | 3.156524  |
| H102 | -2.795243 | 5.289255  | 1.368934  | H162 | -2.490990 | -5.918271 | -0.151918 |
| H103 | -2.211454 | 3.282863  | 2.761280  | H163 | -2.304210 | -6.361622 | 1.536835  |
| H104 | -1.939105 | 2.971611  | 1.039939  | H164 | -1.993292 | -3.525999 | 0.364244  |
| H105 | -0.568004 | 3.310724  | 2.111099  | H165 | -0.680929 | -4.586406 | 0.903383  |
| H106 | -1.929181 | 5.609513  | 3.707699  | H166 | -1.814006 | -3.908607 | 2.080858  |
| H107 | -1.494716 | 6.976034  | 2.677287  | H167 | -4.706471 | -7.387858 | 0.959728  |
| H108 | -0.283348 | 5.749426  | 3.076952  | H168 | -1.452260 | -2.830136 | 6.634063  |
| H109 | -0.772696 | 7.600698  | 0.607225  | H169 | -0.552546 | -3.533482 | 5.297805  |
| H110 | -0.668756 | 6.992847  | -4.494612 | H170 | -2.232091 | -5.416784 | 5.153370  |
| H111 | 1.056855  | -0.529724 | 9.130304  | H171 | 8.674653  | 1.810464  | -5.500119 |
| H112 | 4.585982  | 1.864629  | 8.587576  | H172 | 9.936572  | 0.295070  | -3.960864 |
| H113 | 0.792019  | -0.705092 | 6.673095  | H173 | 10.530427 | -0.197734 | -1.112337 |
| H114 | 4.303654  | 1.698909  | 6.123020  | H174 | 11.089749 | -1.878322 | -0.874153 |
| H115 | 1.678029  | -0.077500 | 4.553615  | H175 | -7.257429 | -1.455061 | 0.947244  |
| H116 | 4.062519  | -5.266141 | 4.823404  | H176 | -7.169961 | 0.306627  | 1.220345  |
| H117 | 4.738009  | -4.334906 | 6.160720  | H177 | -7.041286 | -0.353690 | -0.416433 |
| H118 | 1.823003  | -5.314399 | 5.956181  | H178 | -2.756094 | -1.156812 | 2.592239  |
| H119 | 7.310676  | 2.761360  | 2.347183  | C179 | 0.674422  | -1.425183 | 1.365480  |
| H120 | 6.621870  | 1.711749  | 0.181174  | C180 | 0.501032  | -0.045696 | 0.888798  |
| H121 | 9.488663  | 0.897990  | 1.252422  | O181 | 0.312736  | -0.694396 | -0.384034 |
| H122 | 7.696815  | 5.098678  | -1.097245 | C182 | 1.869968  | 0.608966  | 0.957154  |
| H123 | 1.755915  | 5.371034  | -4.206933 | C183 | 2.097211  | -1.856952 | 1.158004  |
| H124 | 1.580261  | 2.296727  | -4.405500 | C184 | 2.856571  | -0.566513 | 0.733622  |
| H125 | -6.069528 | 4.316237  | -3.703745 | H185 | -0.360081 | 0.536536  | 1.217616  |
| H126 | -6.744499 | 3.464438  | -1.447800 | H186 | 1.975761  | 1.404487  | 0.214499  |
| H127 | -7.667716 | 2.652921  | -2.723915 | H187 | 3.779470  | -0.436926 | 1.303408  |
| H128 | -6.310428 | 1.821051  | -1.941732 | H188 | 1.993436  | 1.043234  | 1.955239  |
| H129 | -4.331949 | 4.288294  | -1.929995 | H189 | 3.130229  | -0.631066 | -0.320976 |
| H130 | -3.589343 | 3.935318  | -3.498570 | H190 | 2.477038  | -2.308839 | 2.076764  |
| H131 | -3.902312 | 2.617604  | -2.357138 | H191 | 2.135783  | -2.638239 | 0.392802  |
| H132 | -5.253242 | 1.418369  | -4.274284 | H192 | -0.161931 | -2.095258 | 1.506610  |

|      |           |           |           |
|------|-----------|-----------|-----------|
| H193 | 1.194500  | 3.420297  | -5.697143 |
| H194 | 8.374108  | 2.244819  | -3.808302 |
| H195 | 8.746362  | -0.628670 | -4.866679 |
| H196 | 9.237466  | 5.829901  | -0.589731 |
| H197 | 9.233368  | 4.399691  | -1.648240 |
| H198 | 9.761859  | 2.360004  | 2.201943  |
| H199 | 2.964685  | 0.736430  | 10.111534 |
| H200 | 3.071998  | -6.050433 | 6.981295  |
| H201 | 2.485724  | -4.416632 | 7.331209  |
| H202 | -1.596048 | -5.301730 | 6.802704  |
| H203 | -3.203685 | -4.647149 | 6.410265  |
| H204 | -6.042556 | -6.250696 | 0.798201  |
| H205 | -5.325119 | -8.578416 | -3.440371 |
| H206 | -2.005452 | -5.777709 | -5.686058 |
| H207 | 3.187659  | -0.971645 | -7.540405 |
| H208 | -1.010890 | -0.872988 | -8.673745 |
| H209 | -3.447955 | -2.264935 | -4.174320 |
| H210 | -2.848171 | -0.776410 | 0.841719  |
| H211 | -4.798507 | -0.490784 | -0.194891 |
| H212 | -0.899328 | 8.735955  | -4.213716 |
| H213 | 0.580028  | 7.923755  | -3.639194 |
| H214 | -6.258088 | 9.743770  | -0.619509 |
| H215 | -5.405257 | 8.500132  | -1.561610 |
| H216 | -5.468535 | 5.994951  | 2.138966  |
| H217 | 7.149615  | 1.356563  | -4.726966 |
| H218 | 11.312822 | -1.087156 | -2.448276 |
| H219 | 8.290750  | 0.455313  | -2.033510 |
| H220 | 7.189808  | -0.604405 | -2.928402 |
| H221 | -2.206658 | 7.077451  | -0.287653 |
| H222 | -1.924335 | -0.238037 | -7.292399 |
| H223 | -6.604747 | 2.272321  | -5.037562 |
| H224 | -4.939786 | 2.796091  | -5.343779 |
| H225 | -2.576101 | -1.205493 | -5.296874 |
| H226 | 2.864673  | 3.295471  | -5.115477 |
| H227 | 4.848071  | -2.146168 | 5.636635  |
| H228 | 3.664763  | -1.278495 | 4.718769  |
| H229 | 8.490827  | 4.314065  | 1.218982  |
| H230 | 1.038443  | -2.182682 | -7.529226 |
| H231 | -2.093160 | 7.532717  | -2.401915 |
| H232 | -7.512303 | 7.762066  | 0.386750  |
| H233 | -4.679056 | -1.555083 | 3.728592  |
| H234 | -6.222728 | -1.299470 | 2.979101  |
| H235 | -4.724677 | -5.723865 | -1.486215 |
| H236 | -3.086260 | -8.352031 | -4.001925 |
| H237 | -0.726931 | -0.759134 | -0.632234 |
| H238 | -0.263281 | -1.452138 | 3.795412  |
| H239 | 1.238162  | -2.015534 | 3.808399  |
| C240 | 7.780633  | 0.963190  | 3.413492  |
| H241 | 8.079046  | -0.069061 | 3.184195  |
| H242 | 8.594084  | 1.387435  | 4.017138  |
| H243 | 7.015341  | 0.113266  | 0.823726  |
| S244 | 2.568197  | 4.164648  | -2.271731 |
| H245 | 2.125430  | 5.278145  | -1.645376 |
| H246 | 0.480012  | 4.373451  | -3.490856 |
| C247 | 6.498867  | 0.958406  | 4.251633  |
| H248 | 6.181760  | 1.980634  | 4.488708  |
| H249 | 5.667218  | 0.469720  | 3.735707  |
| H250 | 6.654944  | 0.435213  | 5.201041  |
| H251 | 5.687583  | 1.059304  | 1.523615  |

### 4.3 Mutant R2

The following atoms were kept fixed in the geometry optimizations of reactant and transition state structures: 1, 6, 7, 15, 16, 23, 28, 34, 35, 40, 42, 46, 51, 56, 60, 65, 73, 77, 82.

#### Reactant:

|     |           |           |           |      |           |           |           |
|-----|-----------|-----------|-----------|------|-----------|-----------|-----------|
| C1  | -5.329037 | 6.750827  | 1.823141  | C51  | -3.684685 | -0.521805 | -4.080538 |
| C2  | -4.816433 | 7.642417  | 0.691521  | C52  | -2.623346 | -0.151372 | -3.039361 |
| O3  | -3.807550 | 7.374060  | 0.040240  | C53  | -3.204398 | 0.227739  | -1.690877 |
| C4  | -4.887235 | 5.299858  | 1.634126  | O54  | -4.356811 | 0.606962  | -1.529361 |
| N5  | -5.556024 | 8.765329  | 0.478397  | O55  | -2.393844 | 0.155294  | -0.628489 |
| C6  | -5.194841 | 9.772029  | -0.501441 | C56  | -1.831706 | -0.416839 | -7.417484 |
| C7  | -0.287934 | 7.113626  | 0.131190  | C57  | -0.515075 | -0.282085 | -6.682250 |
| C8  | 0.455416  | 7.230102  | -1.191560 | O58  | -0.371008 | 0.462613  | -5.714445 |
| O9  | 1.638260  | 6.908445  | -1.321961 | N59  | 0.471274  | -1.074699 | -7.181754 |
| C10 | 0.085242  | 5.838662  | 0.898383  | C60  | 1.827364  | -1.109098 | -6.669924 |
| C11 | -0.537295 | 5.731156  | 2.304058  | C61  | 2.253190  | -2.475650 | -6.077497 |
| C12 | -0.334924 | 4.317665  | 2.869216  | C62  | 2.276158  | -2.565491 | -4.535269 |
| C13 | 0.022211  | 6.781635  | 3.275819  | C63  | 3.381259  | -1.682952 | -3.934470 |
| N14 | -0.266356 | 7.771919  | -2.213856 | C64  | 0.911017  | -2.260487 | -3.902154 |
| C15 | 0.304926  | 8.011938  | -3.526169 | C65  | -3.135909 | -5.716510 | -4.646770 |
| C16 | 3.151893  | 0.142200  | 8.987961  | C66  | -4.337137 | -5.542870 | -3.727739 |
| C17 | 1.982148  | -0.412938 | 8.463286  | O67  | -4.646957 | -4.452103 | -3.241675 |
| C18 | 4.091659  | 0.693719  | 8.113601  | C68  | -1.810835 | -5.396541 | -3.929155 |
| C19 | 1.753581  | -0.436793 | 7.087011  | C69  | -1.409504 | -6.380280 | -2.811091 |
| C20 | 3.875302  | 0.680613  | 6.736890  | C70  | -1.094917 | -7.785327 | -3.347072 |
| C21 | 2.706625  | 0.108770  | 6.213348  | C71  | -0.212766 | -5.828013 | -2.023097 |
| O22 | 2.568351  | 0.068287  | 4.859008  | N72  | -5.060713 | -6.668270 | -3.486244 |
| C23 | 2.024903  | -5.495024 | 6.400095  | C73  | -6.350241 | -6.622877 | -2.818162 |
| C24 | 3.138296  | -5.056901 | 5.438621  | C74  | -6.333759 | -6.739502 | -1.287347 |
| C25 | 2.764635  | -3.753467 | 4.747582  | O75  | -6.637546 | -7.788087 | -0.726849 |
| N26 | 3.644036  | -2.731833 | 4.848428  | N76  | -6.017571 | -5.587599 | -0.645686 |
| O27 | 1.698788  | -3.666421 | 4.122917  | C77  | -6.098170 | -5.469372 | 0.803156  |
| C28 | 9.118641  | 0.579573  | 1.122253  | C78  | -5.058731 | -4.508149 | 1.393086  |
| C29 | 9.208623  | 1.374239  | -0.161294 | C79  | -3.620141 | -4.993212 | 1.127636  |
| O30 | 9.355288  | 0.858437  | -1.269529 | C80  | -5.356068 | -4.324030 | 2.886676  |
| C31 | 7.728704  | 0.601253  | 1.802867  | C81  | -2.547913 | -3.913056 | 1.299371  |
| C32 | 6.642231  | 0.060017  | 0.863310  | C82  | -2.799890 | -4.401835 | 6.182706  |
| N33 | 9.121948  | 2.720218  | 0.018471  | C83  | -2.104244 | -3.053462 | 5.939389  |
| C34 | 9.111734  | 3.642178  | -1.089028 | C84  | -2.854856 | -2.118622 | 4.976093  |
| C35 | 7.900598  | 0.428804  | -4.861879 | O85  | -4.106111 | -2.043339 | 5.071250  |
| C36 | 8.696981  | -0.853247 | -4.592903 | O86  | -2.153926 | -1.456304 | 4.135206  |
| C37 | 8.195050  | -1.578964 | -3.342258 | O87  | 0.500931  | -1.181903 | 3.936345  |
| S38 | 9.141330  | -3.084990 | -2.876077 | H88  | -5.291140 | 4.897389  | 0.702971  |
| C39 | 10.723437 | -2.325224 | -2.352361 | H89  | -3.798860 | 5.255069  | 1.580705  |
| C40 | 1.838160  | 3.211732  | -4.735991 | H90  | -4.927420 | 7.139837  | 2.767760  |
| C41 | 1.755357  | 4.278352  | -3.648780 | H91  | -6.008781 | 9.937259  | -1.215009 |
| C42 | -5.621188 | 3.469293  | -4.126227 | H92  | -0.226533 | 4.969810  | 0.304546  |
| C43 | -5.499254 | 4.599823  | -3.095428 | H93  | 1.177455  | 5.779904  | 0.974429  |
| C44 | -6.514622 | 4.410506  | -1.960235 | H94  | -1.620375 | 5.905922  | 2.209197  |
| C45 | -4.066968 | 4.691983  | -2.550172 | H95  | -0.791798 | 4.213022  | 3.858778  |
| C46 | -6.944996 | 0.627474  | 1.085276  | H96  | -0.778152 | 3.559259  | 2.214256  |
| N47 | -5.499100 | 0.500091  | 1.157306  | H97  | 0.731974  | 4.085757  | 2.970058  |
| C48 | -4.831929 | -0.033800 | 2.204862  | H98  | -0.440794 | 6.685957  | 4.263816  |
| N49 | -5.466822 | -0.403147 | 3.324963  | H99  | -0.154101 | 7.805002  | 2.929139  |
| N50 | -3.505906 | -0.147760 | 2.147295  | H100 | 1.104237  | 6.654661  | 3.402722  |
|     |           |           |           | H101 | -0.002786 | 7.998582  | 0.716072  |

|      |           |           |           |      |           |           |           |
|------|-----------|-----------|-----------|------|-----------|-----------|-----------|
| H102 | -0.043920 | 7.280723  | -4.265579 | H162 | -2.831942 | -5.000873 | 5.266716  |
| H103 | 1.237004  | -0.838551 | 9.130246  | H163 | 8.265820  | 0.942405  | -5.757670 |
| H104 | 5.002125  | 1.139790  | 8.505325  | H164 | 9.754087  | -0.595036 | -4.462173 |
| H105 | 0.851234  | -0.878075 | 6.675551  | H165 | 10.530375 | -1.457524 | -1.716932 |
| H106 | 4.596409  | 1.110373  | 6.049361  | H166 | 11.269948 | -3.082171 | -1.785065 |
| H107 | 1.669563  | -0.296850 | 4.586924  | H167 | -7.457123 | -0.339641 | 1.180586  |
| H108 | 3.267221  | -5.812003 | 4.654518  | H168 | -7.325628 | 1.311574  | 1.852341  |
| H109 | 4.096538  | -4.966854 | 5.962128  | H169 | -7.193801 | 1.043575  | 0.108679  |
| H110 | 1.077355  | -5.571913 | 5.862739  | H170 | -2.987675 | -0.617580 | 2.926861  |
| H111 | 7.479150  | 1.646629  | 2.043909  | C171 | 0.257163  | -1.381198 | 0.718660  |
| H112 | 6.605571  | 0.622369  | -0.074361 | C172 | 0.582277  | 0.042484  | 0.685456  |
| H113 | 9.389496  | -0.451931 | 0.878476  | O173 | 0.074060  | -0.618278 | -0.529084 |
| H114 | 8.110480  | 4.048798  | -1.277796 | C174 | 2.082328  | 0.220432  | 0.687634  |
| H115 | 2.265977  | 5.192650  | -3.960404 | C175 | 1.534514  | -2.189405 | 0.711879  |
| H116 | 1.319958  | 2.292238  | -4.448507 | C176 | 2.620802  | -1.172602 | 0.273814  |
| H117 | -5.733034 | 5.548903  | -3.600803 | H177 | -0.078678 | 0.805818  | 1.086770  |
| H118 | -6.466765 | 5.235108  | -1.239567 | H178 | 2.415425  | 1.025643  | 0.025853  |
| H119 | -7.540860 | 4.360172  | -2.341537 | H179 | 3.595368  | -1.391340 | 0.717467  |
| H120 | -6.315582 | 3.477970  | -1.416881 | H180 | 2.374826  | 0.474362  | 1.714026  |
| H121 | -3.962541 | 5.498743  | -1.817311 | H181 | 2.739461  | -1.203583 | -0.811461 |
| H122 | -3.349016 | 4.872574  | -3.358448 | H182 | 1.702341  | -2.556201 | 1.729506  |
| H123 | -3.782094 | 3.751016  | -2.064055 | H183 | 1.477586  | -3.060317 | 0.050172  |
| H124 | -5.408165 | 2.502053  | -3.655621 | H184 | -0.657215 | -1.764098 | 1.159795  |
| H125 | -2.021626 | 0.696328  | -3.393134 | H185 | 1.367356  | 3.576039  | -5.655410 |
| H126 | -1.908853 | -0.969458 | -2.895953 | H186 | 7.986085  | 1.119288  | -4.016421 |
| H127 | -4.438234 | 0.263792  | -4.166009 | H187 | 8.643680  | -1.528739 | -5.455369 |
| H128 | -2.368973 | -1.305927 | -7.071073 | H188 | 9.797713  | 4.476334  | -0.908241 |
| H129 | 1.586877  | -3.252249 | -6.476387 | H189 | 9.438433  | 3.097931  | -1.975031 |
| H130 | 3.256909  | -2.719226 | -6.446996 | H190 | 9.870554  | 0.956987  | 1.828088  |
| H131 | 2.531082  | -3.608657 | -4.297553 | H191 | 3.322683  | 0.154071  | 10.059963 |
| H132 | 3.465606  | -1.847762 | -2.855908 | H192 | 2.256719  | -6.467391 | 6.844015  |
| H133 | 3.177675  | -0.616281 | -4.081387 | H193 | 1.898472  | -4.772233 | 7.212278  |
| H134 | 4.357052  | -1.904490 | -4.381841 | H194 | -2.271122 | -4.982108 | 6.945752  |
| H135 | 0.954637  | -2.358876 | -2.812770 | H195 | -3.829027 | -4.240316 | 6.512307  |
| H136 | 0.584577  | -1.239734 | -4.124221 | H196 | -7.105911 | -5.134914 | 1.089548  |
| H137 | 0.142124  | -2.947863 | -4.273046 | H197 | -6.952102 | -7.459364 | -3.177559 |
| H138 | 1.890253  | -0.312829 | -5.926304 | H198 | -3.277543 | -5.007857 | -5.470205 |
| H139 | -1.901408 | -4.389688 | -3.506466 | H199 | 2.507964  | -0.835984 | -7.485794 |
| H140 | -1.005960 | -5.356228 | -4.675195 | H200 | -1.694390 | -0.509496 | -8.499604 |
| H141 | -2.255636 | -6.464213 | -2.113429 | H201 | -4.189283 | -1.455993 | -3.814752 |
| H142 | -0.808092 | -8.458247 | -2.532638 | H202 | -3.039923 | 0.055569  | 1.270538  |
| H143 | -1.949212 | -8.242727 | -3.857399 | H203 | -4.986181 | 0.626008  | 0.280770  |
| H144 | -0.261966 | -7.753065 | -4.060310 | H204 | 0.050401  | 9.016305  | -3.879852 |
| H145 | 0.067168  | -6.501112 | -1.206141 | H205 | 1.387458  | 7.924583  | -3.433341 |
| H146 | -0.439642 | -4.848721 | -1.589097 | H206 | -4.946674 | 10.726294 | -0.023209 |
| H147 | 0.664286  | -5.710569 | -2.671460 | H207 | -4.319419 | 9.406484  | -1.037480 |
| H148 | -3.115779 | -6.719105 | -5.086511 | H208 | -6.421393 | 6.817789  | 1.893325  |
| H149 | -6.836560 | -5.685588 | -3.106643 | H209 | 6.835786  | 0.214853  | -5.012233 |
| H150 | -5.184822 | -3.532769 | 0.893961  | H210 | 11.330541 | -2.022217 | -3.208989 |
| H151 | -6.380664 | -3.966440 | 3.042698  | H211 | 8.200556  | -0.900504 | -2.484732 |
| H152 | -4.690100 | -3.608505 | 3.370014  | H212 | 7.167502  | -1.931411 | -3.488666 |
| H153 | -5.260953 | -5.280179 | 3.415890  | H213 | -1.372211 | 7.171114  | -0.014594 |
| H154 | -3.562343 | -5.385315 | 0.104790  | H214 | -2.447286 | 0.458525  | -7.209345 |
| H155 | -3.406703 | -5.841895 | 1.792224  | H215 | -6.629453 | 3.421278  | -4.552882 |
| H156 | -2.718802 | -3.086931 | 0.597981  | H216 | -4.913172 | 3.605448  | -4.951173 |
| H157 | -1.551313 | -4.320696 | 1.097850  | H217 | -3.207305 | -0.652310 | -5.051660 |
| H158 | -2.531815 | -3.487547 | 2.306778  | H218 | 2.879810  | 2.964227  | -4.965032 |
| H159 | -5.973078 | -6.475994 | 1.213653  | H219 | 4.414162  | -2.795356 | 5.495322  |
| H160 | -2.018811 | -2.514702 | 6.893504  | H220 | 3.356548  | -1.792788 | 4.574589  |
| H161 | -1.086241 | -3.199268 | 5.565897  | H221 | 8.944214  | 3.071422  | 0.946899  |

|      |           |           |           |     |           |           |           |
|------|-----------|-----------|-----------|-----|-----------|-----------|-----------|
| H222 | 0.255180  | -1.652624 | -7.980365 | C32 | 6.754936  | -0.068384 | 0.709398  |
| H223 | -1.248644 | 7.946457  | -2.061578 | N33 | 9.102878  | 2.903937  | 0.132447  |
| H224 | -6.371007 | 8.918962  | 1.052674  | C34 | 9.073374  | 3.861436  | -0.944656 |
| H225 | -4.946619 | -0.977151 | 4.036425  | C35 | 7.923919  | 0.752764  | -4.823050 |
| H226 | -6.472955 | -0.424827 | 3.333667  | C36 | 8.706881  | -0.546016 | -4.597531 |
| H227 | -5.734092 | -4.794792 | -1.211535 | C37 | 8.196894  | -1.304789 | -3.370078 |
| H228 | -4.744039 | -7.549379 | -3.859251 | S38 | 9.137521  | -2.824318 | -2.936491 |
| H229 | -1.453099 | -0.175552 | -0.785412 | C39 | 10.717514 | -2.078571 | -2.386466 |
| H230 | -0.477387 | -1.244421 | 4.092164  | C40 | 1.814589  | 3.426476  | -4.620436 |
| H231 | 0.837894  | -2.101668 | 3.947989  | C41 | 1.699250  | 4.425854  | -3.473840 |
| C232 | 7.798340  | -0.170907 | 3.135369  | C42 | -5.649123 | 3.536954  | -4.019759 |
| H233 | 7.981959  | -1.232692 | 2.919758  | C43 | -5.448467 | 4.694012  | -3.033313 |
| H234 | 8.674132  | 0.179235  | 3.698354  | C44 | -6.681625 | 4.867205  | -2.135309 |
| H235 | 6.836777  | -0.989145 | 0.611394  | C45 | -4.175135 | 4.487789  | -2.200519 |
| S236 | 2.551942  | 3.688375  | -2.087560 | C46 | -6.933250 | 0.504420  | 1.093255  |
| H237 | 2.389995  | 4.849450  | -1.414441 | N47 | -5.490924 | 0.350664  | 1.115656  |
| H238 | 0.713215  | 4.528324  | -3.433190 | C48 | -4.800313 | -0.159806 | 2.152455  |
| S239 | -5.488679 | 4.294803  | 3.059205  | N49 | -5.387313 | -0.416462 | 3.338474  |
| H240 | -4.853268 | 3.153465  | 2.726828  | N50 | -3.491469 | -0.358453 | 2.021308  |
| C241 | 6.556936  | -0.028142 | 4.020829  | C51 | -3.644769 | -0.419958 | -4.099772 |
| H242 | 6.351528  | 1.025461  | 4.242358  | C52 | -2.618930 | -0.249444 | -2.970438 |
| H243 | 5.660192  | -0.444125 | 3.553064  | C53 | -3.200704 | -0.072069 | -1.569307 |
| H244 | 6.699106  | -0.541945 | 4.977233  | O54 | -4.366034 | 0.345083  | -1.423874 |
| H245 | 5.651252  | 0.121371  | 1.321401  | O55 | -2.424782 | -0.355397 | -0.569285 |
|      |           |           |           | C56 | -1.788038 | -0.174597 | -7.427249 |
|      |           |           |           | C57 | -0.457997 | 0.001784  | -6.723470 |
|      |           |           |           | O58 | -0.272598 | 0.850526  | -5.855737 |
|      |           |           |           | N59 | 0.499052  | -0.878776 | -7.132081 |
|      |           |           |           | C60 | 1.881020  | -0.828486 | -6.694243 |
|      |           |           |           | C61 | 2.372730  | -2.108682 | -5.980647 |
|      |           |           |           | C62 | 2.288562  | -2.109210 | -4.438123 |
|      |           |           |           | C63 | 3.285666  | -1.118546 | -3.816997 |
|      |           |           |           | C64 | 0.867094  | -1.861618 | -3.915090 |
|      |           |           |           | C65 | -3.006297 | -5.583317 | -4.833813 |
|      |           |           |           | C66 | -4.206859 | -5.467270 | -3.904365 |
|      |           |           |           | O67 | -4.532749 | -4.402669 | -3.375451 |
|      |           |           |           | C68 | -1.689192 | -5.221382 | -4.122807 |
|      |           |           |           | C69 | -1.237040 | -6.211199 | -3.030729 |
|      |           |           |           | C70 | -0.899473 | -7.599430 | -3.595583 |
|      |           |           |           | C71 | -0.037567 | -5.640022 | -2.260530 |
|      |           |           |           | N72 | -4.914152 | -6.612400 | -3.705533 |
|      |           |           |           | C73 | -6.207850 | -6.603482 | -3.043128 |
|      |           |           |           | C74 | -6.197152 | -6.771469 | -1.516774 |
|      |           |           |           | O75 | -6.492684 | -7.841501 | -0.992790 |
|      |           |           |           | N76 | -5.891315 | -5.639440 | -0.836409 |
|      |           |           |           | C77 | -5.981847 | -5.564666 | 0.614445  |
|      |           |           |           | C78 | -4.930637 | -4.638020 | 1.235624  |
|      |           |           |           | C79 | -3.503366 | -5.160844 | 0.984848  |
|      |           |           |           | C80 | -5.243861 | -4.460158 | 2.726609  |
|      |           |           |           | C81 | -2.411745 | -4.100078 | 1.145471  |
|      |           |           |           | C82 | -2.711681 | -4.617283 | 6.033515  |
|      |           |           |           | C83 | -1.916550 | -3.346694 | 5.699728  |
|      |           |           |           | C84 | -2.683118 | -2.325077 | 4.841686  |
|      |           |           |           | O85 | -3.921271 | -2.224645 | 4.980232  |
|      |           |           |           | O86 | -1.993290 | -1.610921 | 4.024344  |
|      |           |           |           | O87 | 0.476037  | -1.250444 | 3.535202  |
|      |           |           |           | H88 | -5.619105 | 4.878435  | 0.771828  |
|      |           |           |           | H89 | -4.033504 | 5.060175  | 1.535593  |
|      |           |           |           | H90 | -4.921458 | 6.900934  | 2.971204  |
|      |           |           |           | H91 | -6.110653 | 9.848125  | -0.955587 |

### TS attack at C1:

|     |           |           |           |
|-----|-----------|-----------|-----------|
| C1  | -5.423478 | 6.627053  | 2.034097  |
| C2  | -4.917184 | 7.573162  | 0.947212  |
| O3  | -3.879723 | 7.362978  | 0.319865  |
| C4  | -5.106946 | 5.171224  | 1.690271  |
| N5  | -5.689654 | 8.676590  | 0.748196  |
| C6  | -5.336888 | 9.724365  | -0.190428 |
| C7  | -0.386370 | 7.130662  | 0.366475  |
| C8  | 0.357965  | 7.297845  | -0.950600 |
| O9  | 1.542076  | 6.986138  | -1.091015 |
| C10 | 0.016041  | 5.847364  | 1.105015  |
| C11 | -0.655272 | 5.670119  | 2.480361  |
| C12 | -0.398332 | 4.255998  | 3.021512  |
| C13 | -0.198539 | 6.725171  | 3.499505  |
| N14 | -0.368160 | 7.870335  | -1.953084 |
| C15 | 0.197426  | 8.157835  | -3.258276 |
| C16 | 3.156664  | -0.066554 | 8.999121  |
| C17 | 1.934024  | -0.522772 | 8.500830  |
| C18 | 4.137852  | 0.363576  | 8.102979  |
| C19 | 1.692253  | -0.570116 | 7.126233  |
| C20 | 3.909046  | 0.326215  | 6.729112  |
| C21 | 2.687222  | -0.148412 | 6.236191  |
| O22 | 2.544184  | -0.218376 | 4.876216  |
| C23 | 2.130706  | -5.634678 | 6.226242  |
| C24 | 2.913834  | -5.369827 | 4.926549  |
| C25 | 2.637395  | -3.968844 | 4.406224  |
| N26 | 3.552609  | -3.020579 | 4.701322  |
| O27 | 1.601506  | -3.725440 | 3.767358  |
| C28 | 9.128771  | 0.728850  | 1.165602  |
| C29 | 9.200750  | 1.565758  | -0.091154 |
| O30 | 9.327482  | 1.084731  | -1.217370 |
| C31 | 7.701426  | 0.560619  | 1.740536  |

|      |           |           |           |      |           |           |           |
|------|-----------|-----------|-----------|------|-----------|-----------|-----------|
| H92  | -0.237306 | 4.986496  | 0.473335  | H152 | -4.562391 | -3.768464 | 3.223567  |
| H93  | 1.106535  | 5.831636  | 1.218809  | H153 | -5.184964 | -5.423466 | 3.248505  |
| H94  | -1.740601 | 5.785864  | 2.340087  | H154 | -3.449919 | -5.564845 | -0.033348 |
| H95  | -0.896253 | 4.100104  | 3.984380  | H155 | -3.311576 | -6.006216 | 1.660326  |
| H96  | -0.764536 | 3.492090  | 2.326894  | H156 | -2.566471 | -3.281181 | 0.432516  |
| H97  | 0.674876  | 4.084295  | 3.170394  | H157 | -1.423454 | -4.534469 | 0.955872  |
| H98  | -0.688480 | 6.572225  | 4.467241  | H158 | -2.392365 | -3.660918 | 2.147500  |
| H99  | -0.428645 | 7.744381  | 3.173153  | H159 | -5.877347 | -6.585407 | 0.994714  |
| H100 | 0.884608  | 6.664223  | 3.662550  | H160 | -1.645109 | -2.830340 | 6.631994  |
| H101 | -0.128136 | 8.008647  | 0.973894  | H161 | -0.976055 | -3.590716 | 5.194347  |
| H102 | -0.135429 | 7.439675  | -4.017586 | H162 | -2.919196 | -5.200104 | 5.130736  |
| H103 | 1.156921  | -0.851300 | 9.185229  | H163 | 8.293828  | 1.292012  | -5.701602 |
| H104 | 5.089557  | 0.733531  | 8.474376  | H164 | 9.766769  | -0.303510 | -4.459299 |
| H105 | 0.743380  | -0.933961 | 6.741558  | H165 | 10.520038 | -1.220987 | -1.738689 |
| H106 | 4.660299  | 0.664763  | 6.023776  | H166 | 11.257638 | -2.845764 | -1.826916 |
| H107 | 1.633764  | -0.491830 | 4.589634  | H167 | -7.463629 | -0.442020 | 1.271019  |
| H108 | 2.595391  | -6.071122 | 4.150652  | H168 | -7.276884 | 1.244411  | 1.826596  |
| H109 | 3.987330  | -5.515824 | 5.091257  | H169 | -7.212027 | 0.860692  | 0.100818  |
| H110 | 1.057646  | -5.513694 | 6.057171  | H170 | -2.966581 | -0.801171 | 2.794480  |
| H111 | 7.315608  | 1.560879  | 1.992264  | C171 | 0.286084  | -1.623026 | 0.637716  |
| H112 | 6.707003  | 0.526261  | -0.206898 | C172 | 0.403360  | -0.425290 | 1.479992  |
| H113 | 9.538014  | -0.255567 | 0.919131  | O173 | 0.008330  | -0.664208 | -0.397322 |
| H114 | 8.066434  | 4.263275  | -1.111344 | C174 | 1.791575  | 0.130600  | 1.402363  |
| H115 | 2.193146  | 5.367401  | -3.724701 | C175 | 1.694426  | -2.172753 | 0.483022  |
| H116 | 1.281065  | 2.495650  | -4.412283 | C176 | 2.600207  | -0.918075 | 0.585228  |
| H117 | -5.328666 | 5.620611  | -3.614804 | H177 | -0.462890 | 0.124680  | 1.821627  |
| H118 | -6.561936 | 5.715739  | -1.451863 | H178 | 1.776644  | 1.115787  | 0.925363  |
| H119 | -7.587718 | 5.040367  | -2.727212 | H179 | 3.558480  | -1.149880 | 1.055988  |
| H120 | -6.851062 | 3.967703  | -1.529930 | H180 | 2.170149  | 0.273627  | 2.417897  |
| H121 | -4.019504 | 5.309858  | -1.493588 | H181 | 2.807734  | -0.519402 | -0.409500 |
| H122 | -3.290483 | 4.423531  | -2.843973 | H182 | 1.884101  | -2.876375 | 1.300415  |
| H123 | -4.232195 | 3.549440  | -1.634936 | H183 | 1.813903  | -2.708332 | -0.462710 |
| H124 | -5.739003 | 2.584894  | -3.482685 | H184 | -0.520008 | -2.330216 | 0.821090  |
| H125 | -1.989395 | 0.627891  | -3.171824 | H185 | 1.374941  | 3.850717  | -5.529526 |
| H126 | -1.930676 | -1.100698 | -2.941922 | H186 | 8.018313  | 1.412821  | -3.954587 |
| H127 | -4.349459 | 0.414199  | -4.119268 | H187 | 8.646077  | -1.192892 | -5.481084 |
| H128 | -2.275780 | -1.099811 | -7.103227 | H188 | 9.752723  | 4.695867  | -0.742232 |
| H129 | 1.809967  | -2.965215 | -6.376521 | H189 | 9.397092  | 3.349715  | -1.850946 |
| H130 | 3.419297  | -2.278481 | -6.264113 | H190 | 9.776361  | 1.169437  | 1.935007  |
| H131 | 2.594293  | -3.117438 | -4.120966 | H191 | 3.336244  | -0.036622 | 10.069044 |
| H132 | 3.278671  | -1.194957 | -2.724864 | H192 | 2.310264  | -6.654308 | 6.577977  |
| H133 | 3.038043  | -0.080822 | -4.065850 | H193 | 2.431365  | -4.943332 | 7.019704  |
| H134 | 4.309195  | -1.312208 | -4.158362 | H194 | -2.156553 | -5.255963 | 6.728447  |
| H135 | 0.839986  | -1.917452 | -2.822119 | H195 | -3.670783 | -4.353715 | 6.484984  |
| H136 | 0.505474  | -0.868118 | -4.196138 | H196 | -6.986030 | -5.220817 | 0.902633  |
| H137 | 0.162508  | -2.602076 | -4.310194 | H197 | -6.798075 | -7.434673 | -3.432871 |
| H138 | 1.964139  | 0.048043  | -6.049186 | H198 | -3.181502 | -4.869173 | -5.646158 |
| H139 | -1.818157 | -4.228349 | -3.678317 | H199 | 2.514350  | -0.640562 | -7.571190 |
| H140 | -0.894416 | -5.132304 | -4.875660 | H200 | -1.664760 | -0.223746 | -8.514624 |
| H141 | -2.065307 | -6.327885 | -2.316529 | H201 | -4.210408 | -1.349321 | -3.981977 |
| H142 | -0.578539 | -8.277706 | -2.798263 | H202 | -3.086177 | -0.305995 | 1.075188  |
| H143 | -1.753929 | -8.069303 | -4.094095 | H203 | -5.002485 | 0.397121  | 0.197017  |
| H144 | -0.083396 | -7.536140 | -4.326139 | H204 | -0.079177 | 9.165709  | -3.584167 |
| H145 | 0.274868  | -6.315635 | -1.457190 | H205 | 1.281776  | 8.091669  | -3.168193 |
| H146 | -0.278796 | -4.670884 | -1.812049 | H206 | -5.188832 | 10.682611 | 0.319606  |
| H147 | 0.822967  | -5.495100 | -2.925491 | H207 | -4.404864 | 9.429882  | -0.672078 |
| H148 | -2.951388 | -6.578370 | -5.288071 | H208 | -6.499159 | 6.761229  | 2.197344  |
| H149 | -6.703928 | -5.662536 | -3.301763 | H209 | 6.856757  | 0.555743  | -4.979093 |
| H150 | -5.021869 | -3.654946 | 0.745877  | H210 | 11.332585 | -1.762517 | -3.232573 |
| H151 | -6.258617 | -4.071991 | 2.872512  | H211 | 8.199662  | -0.649538 | -2.494784 |

|      |           |           |           |     |           |           |           |
|------|-----------|-----------|-----------|-----|-----------|-----------|-----------|
| H212 | 7.169357  | -1.650652 | -3.531249 | O22 | 2.606197  | -0.150415 | 4.804441  |
| H213 | -1.471150 | 7.161724  | 0.218135  | C23 | 2.198691  | -5.731568 | 6.131950  |
| H214 | -2.435318 | 0.665657  | -7.178573 | C24 | 3.300245  | -5.223355 | 5.193097  |
| H215 | -6.553836 | 3.673256  | -4.623356 | C25 | 2.914673  | -3.882161 | 4.593454  |
| H216 | -4.798761 | 3.448605  | -4.704742 | N26 | 3.813590  | -2.880438 | 4.680360  |
| H217 | -3.105587 | -0.453951 | -5.048010 | O27 | 1.812720  | -3.746900 | 4.037508  |
| H218 | 2.862652  | 3.189634  | -4.831914 | C28 | 9.145533  | 0.627135  | 0.995245  |
| H219 | 4.327143  | -3.233275 | 5.309949  | C29 | 9.193905  | 1.470511  | -0.258909 |
| H220 | 3.325513  | -2.037211 | 4.558679  | O30 | 9.288267  | 0.995207  | -1.390510 |
| H221 | 8.954583  | 3.225716  | 1.076549  | C31 | 7.754397  | 0.562054  | 1.670085  |
| H222 | 0.264614  | -1.520704 | -7.874891 | C32 | 6.697820  | -0.001993 | 0.710638  |
| H223 | -1.353018 | 8.025088  | -1.796034 | N33 | 9.120521  | 2.808336  | -0.024042 |
| H224 | -6.531328 | 8.778305  | 1.294379  | C34 | 9.071965  | 3.774177  | -1.092836 |
| H225 | -4.872206 | -1.017312 | 4.009981  | C35 | 7.839119  | 0.698216  | -4.971701 |
| H226 | -6.392346 | -0.405598 | 3.394002  | C36 | 8.585989  | -0.623264 | -4.756246 |
| H227 | -5.613498 | -4.825829 | -1.375654 | C37 | 8.070685  | -1.366679 | -3.521509 |
| H228 | -4.593764 | -7.472013 | -4.122795 | S38 | 8.971417  | -2.913847 | -3.101147 |
| H229 | -1.051609 | -0.545299 | -0.544533 | C39 | 10.581501 | -2.216453 | -2.575619 |
| H230 | -0.497299 | -1.426514 | 3.810321  | C40 | 1.749347  | 3.404324  | -4.647126 |
| H231 | 0.901264  | -2.144091 | 3.520842  | C41 | 1.655648  | 4.399604  | -3.495044 |
| C232 | 7.776687  | -0.250776 | 3.049419  | C42 | -5.702320 | 3.552113  | -3.918544 |
| H233 | 8.119759  | -1.268209 | 2.815956  | C43 | -5.485085 | 4.702927  | -2.928539 |
| H234 | 8.551258  | 0.190393  | 3.691119  | C44 | -6.708933 | 4.877055  | -2.018098 |
| H235 | 7.094297  | -1.073331 | 0.432430  | C45 | -4.203916 | 4.484232  | -2.111145 |
| S236 | 2.494130  | 3.770883  | -1.935957 | C46 | -6.916406 | 0.492245  | 1.195297  |
| H237 | 2.339308  | 4.907815  | -1.222310 | N47 | -5.471771 | 0.355214  | 1.192361  |
| H238 | 0.649901  | 4.639859  | -3.255054 | C48 | -4.763962 | -0.167296 | 2.212424  |
| S239 | -5.652533 | 4.077934  | 3.073877  | N49 | -5.337846 | -0.458107 | 3.396112  |
| H240 | -5.138317 | 2.935758  | 2.575238  | N50 | -3.453134 | -0.342299 | 2.067313  |
| C241 | 6.465994  | -0.315653 | 3.838502  | C51 | -3.722038 | -0.415219 | -4.059095 |
| H242 | 6.086708  | 0.689814  | 4.053920  | C52 | -2.677181 | -0.170536 | -2.961291 |
| H243 | 5.680970  | -0.852678 | 3.297719  | C53 | -3.244796 | -0.002502 | -1.549259 |
| H244 | 6.614578  | -0.825945 | 4.795964  | O54 | -4.411365 | 0.407957  | -1.388764 |
| H245 | 5.737464  | -0.148765 | 1.101385  | O55 | -2.458311 | -0.283264 | -0.558285 |
|      |           |           |           | C56 | -1.920832 | -0.157664 | -7.416040 |
|      |           |           |           | C57 | -0.571966 | 0.022781  | -6.749066 |
|      |           |           |           | O58 | -0.351087 | 0.903010  | -5.922219 |
|      |           |           |           | N59 | 0.360472  | -0.891253 | -7.142182 |
|      |           |           |           | C60 | 1.756409  | -0.836824 | -6.750078 |
|      |           |           |           | C61 | 2.259843  | -2.089518 | -5.998361 |
|      |           |           |           | C62 | 2.209471  | -2.032324 | -4.455206 |
|      |           |           |           | C63 | 3.216082  | -1.015251 | -3.895093 |
|      |           |           |           | C64 | 0.799360  | -1.771624 | -3.907827 |
|      |           |           |           | C65 | -3.125371 | -5.576956 | -4.838316 |
|      |           |           |           | C66 | -4.315272 | -5.459891 | -3.895488 |
|      |           |           |           | O67 | -4.633946 | -4.395894 | -3.361255 |
|      |           |           |           | C68 | -1.804152 | -5.186859 | -4.149932 |
|      |           |           |           | C69 | -1.328089 | -6.150790 | -3.045140 |
|      |           |           |           | C70 | -0.973528 | -7.543434 | -3.588356 |
|      |           |           |           | C71 | -0.131798 | -5.547497 | -2.294522 |
|      |           |           |           | N72 | -5.026727 | -6.602523 | -3.696808 |
|      |           |           |           | C73 | -6.301717 | -6.591442 | -3.000140 |
|      |           |           |           | C74 | -6.237159 | -6.776784 | -1.477639 |
|      |           |           |           | O75 | -6.440498 | -7.870133 | -0.958304 |
|      |           |           |           | N76 | -5.994761 | -5.631208 | -0.794065 |
|      |           |           |           | C77 | -6.007642 | -5.578646 | 0.659891  |
|      |           |           |           | C78 | -4.960028 | -4.615299 | 1.235139  |
|      |           |           |           | C79 | -3.529091 | -5.060264 | 0.876566  |
|      |           |           |           | C80 | -5.184290 | -4.489646 | 2.747265  |
|      |           |           |           | C81 | -2.458729 | -3.983269 | 1.081957  |

### TS attack at C2:

|     |           |           |           |
|-----|-----------|-----------|-----------|
| C1  | -5.356227 | 6.599913  | 2.151046  |
| C2  | -4.866775 | 7.551115  | 1.061265  |
| O3  | -3.847638 | 7.334473  | 0.406373  |
| C4  | -5.111736 | 5.143150  | 1.754924  |
| N5  | -5.630586 | 8.664764  | 0.889748  |
| C6  | -5.289974 | 9.711667  | -0.053937 |
| C7  | -0.345452 | 7.086854  | 0.401170  |
| C8  | 0.378974  | 7.261800  | -0.925900 |
| O9  | 1.561605  | 6.953572  | -1.085702 |
| C10 | 0.078970  | 5.808830  | 1.136354  |
| C11 | -0.580536 | 5.624142  | 2.516395  |
| C12 | -0.294203 | 4.217308  | 3.061600  |
| C13 | -0.137424 | 6.691551  | 3.528753  |
| N14 | -0.363435 | 7.837124  | -1.914756 |
| C15 | 0.182390  | 8.135257  | -3.226083 |
| C16 | 3.303166  | -0.188091 | 8.923983  |
| C17 | 2.099368  | -0.691367 | 8.423185  |
| C18 | 4.231062  | 0.353924  | 8.030654  |
| C19 | 1.825807  | -0.676332 | 7.052732  |
| C20 | 3.970067  | 0.379676  | 6.661611  |
| C21 | 2.768639  | -0.143414 | 6.165217  |



|      |           |           |           |      |           |           |           |
|------|-----------|-----------|-----------|------|-----------|-----------|-----------|
| C82  | -2.640440 | -4.686064 | 6.028606  | H142 | -0.636109 | -8.202581 | -2.781843 |
| C83  | -1.862593 | -3.393887 | 5.734921  | H143 | -1.824542 | -8.034884 | -4.071654 |
| C84  | -2.625206 | -2.379177 | 4.864606  | H144 | -0.164081 | -7.480723 | -4.326320 |
| O85  | -3.861091 | -2.268531 | 5.013481  | H145 | 0.196601  | -6.204107 | -1.481692 |
| O86  | -1.937862 | -1.679301 | 4.031637  | H146 | -0.384131 | -4.573535 | -1.862622 |
| O87  | 0.540171  | -1.414197 | 3.515027  | H147 | 0.721537  | -5.402248 | -2.968606 |
| H88  | -5.694912 | 4.892525  | 0.866803  | H148 | -3.064313 | -6.578670 | -5.276867 |
| H89  | -4.055187 | 5.003890  | 1.525208  | H149 | -6.798867 | -5.645893 | -3.237273 |
| H90  | -4.796131 | 6.831484  | 3.066323  | H150 | -5.129874 | -3.626385 | 0.779093  |
| H91  | -6.081107 | 9.846463  | -0.799260 | H151 | -6.209602 | -4.170149 | 2.967064  |
| H92  | -0.168622 | 4.944616  | 0.506909  | H152 | -4.517163 | -3.766296 | 3.217247  |
| H93  | 1.170389  | 5.806157  | 1.241771  | H153 | -5.031925 | -5.457656 | 3.240698  |
| H94  | -1.668719 | 5.718949  | 2.382131  | H154 | -3.511507 | -5.373953 | -0.174026 |
| H95  | -0.782884 | 4.056478  | 4.028331  | H155 | -3.280176 | -5.953292 | 1.467199  |
| H96  | -0.651902 | 3.443839  | 2.373138  | H156 | -2.653991 | -3.109876 | 0.448304  |
| H97  | 0.782702  | 4.064416  | 3.203443  | H157 | -1.469262 | -4.374148 | 0.817483  |
| H98  | -0.616393 | 6.531258  | 4.500780  | H158 | -2.413243 | -3.636212 | 2.118863  |
| H99  | -0.391187 | 7.704850  | 3.201452  | H159 | -5.839015 | -6.598778 | 1.018316  |
| H100 | 0.948005  | 6.653416  | 3.683448  | H160 | -1.638263 | -2.883250 | 6.682568  |
| H101 | -0.089552 | 7.968357  | 1.004457  | H161 | -0.899100 | -3.614533 | 5.263795  |
| H102 | -0.154828 | 7.418127  | -3.984422 | H162 | -2.805897 | -5.262779 | 5.113130  |
| H103 | 1.360506  | -1.107159 | 9.102583  | H163 | 8.213360  | 1.226201  | -5.855246 |
| H104 | 5.167421  | 0.762774  | 8.400403  | H164 | 9.654444  | -0.412226 | -4.632976 |
| H105 | 0.892265  | -1.079308 | 6.669573  | H165 | 10.419806 | -1.349411 | -1.930531 |
| H106 | 4.682875  | 0.802194  | 5.961368  | H166 | 11.103971 | -2.997293 | -2.018184 |
| H107 | 1.713785  | -0.464815 | 4.517958  | H167 | -7.433300 | -0.464458 | 1.357068  |
| H108 | 3.427985  | -5.924043 | 4.359458  | H168 | -7.256336 | 1.209680  | 1.952177  |
| H109 | 4.262984  | -5.159526 | 5.711651  | H169 | -7.213981 | 0.869970  | 0.216372  |
| H110 | 1.247539  | -5.787090 | 5.599024  | H170 | -2.918409 | -0.801586 | 2.822404  |
| H111 | 7.456106  | 1.587351  | 1.939724  | C171 | 0.333994  | -1.486342 | 1.343584  |
| H112 | 6.643429  | 0.580218  | -0.213493 | C172 | 0.342220  | -0.074466 | 0.931803  |
| H113 | 9.462367  | -0.381980 | 0.715834  | O173 | -0.029970 | -0.619841 | -0.348347 |
| H114 | 8.064587  | 4.185596  | -1.231117 | C174 | 1.795734  | 0.365211  | 0.919692  |
| H115 | 2.102972  | 5.357852  | -3.769114 | C175 | 1.655506  | -2.115447 | 1.008262  |
| H116 | 1.258616  | 2.456097  | -4.414369 | C176 | 2.572892  | -0.933228 | 0.580320  |
| H117 | -5.366542 | 5.632169  | -3.506079 | H177 | -0.395648 | 0.612595  | 1.347233  |
| H118 | -6.583636 | 5.726981  | -1.337431 | H178 | 1.965570  | 1.166680  | 0.195482  |
| H119 | -7.620342 | 5.048550  | -2.602297 | H179 | 3.540621  | -0.972397 | 1.085644  |
| H120 | -6.871973 | 3.978055  | -1.410275 | H180 | 2.055717  | 0.734679  | 1.917602  |
| H121 | -4.032218 | 5.302075  | -1.403068 | H181 | 2.761566  | -0.984354 | -0.493376 |
| H122 | -3.328072 | 4.416232  | -2.766352 | H182 | 2.026344  | -2.668598 | 1.873626  |
| H123 | -4.261189 | 3.543312  | -1.549941 | H183 | 1.518387  | -2.850842 | 0.209558  |
| H124 | -5.789462 | 2.597780  | -3.385268 | H184 | -0.584297 | -2.029608 | 1.515700  |
| H125 | -2.104537 | 0.739085  | -3.187896 | H185 | 1.250240  | 3.810922  | -5.533021 |
| H126 | -1.942638 | -0.981612 | -2.936138 | H186 | 7.964489  | 1.355035  | -4.104746 |
| H127 | -4.488476 | 0.363024  | -4.041240 | H187 | 8.493799  | -1.268142 | -5.638541 |
| H128 | -2.395084 | -1.087306 | -7.084951 | H188 | 9.763221  | 4.601334  | -0.901267 |
| H129 | 1.688431  | -2.959469 | -6.350307 | H189 | 9.368599  | 3.267241  | -2.011005 |
| H130 | 3.300067  | -2.271664 | -6.297393 | H190 | 9.877941  | 1.012217  | 1.717206  |
| H131 | 2.527074  | -3.026816 | -4.107883 | H191 | 3.507091  | -0.207331 | 9.989635  |
| H132 | 3.234554  | -1.049353 | -2.801021 | H192 | 2.446098  | -6.726519 | 6.512075  |
| H133 | 2.958490  | 0.011626  | -4.176622 | H193 | 2.071442  | -5.062851 | 6.988834  |
| H134 | 4.232461  | -1.218066 | -4.252143 | H194 | -2.093307 | -5.320089 | 6.733634  |
| H135 | 0.795766  | -1.797048 | -2.813215 | H195 | -3.618607 | -4.447358 | 6.452090  |
| H136 | 0.430044  | -0.787299 | -4.210881 | H196 | -7.006486 | -5.279599 | 1.009156  |
| H137 | 0.087876  | -2.524238 | -4.266209 | H197 | -6.907397 | -7.416038 | -3.380733 |
| H138 | 1.867047  | 0.064801  | -6.145097 | H198 | -3.319346 | -4.879045 | -5.660689 |
| H139 | -1.940201 | -4.187635 | -3.721804 | H199 | 2.363940  | -0.692159 | -7.653192 |
| H140 | -1.019215 | -5.102000 | -4.913592 | H200 | -1.823720 | -0.201732 | -8.506438 |
| H141 | -2.148844 | -6.267674 | -2.322334 | H201 | -4.216416 | -1.382280 | -3.919891 |

|      |           |           |           |
|------|-----------|-----------|-----------|
| H202 | -3.058830 | -0.259113 | 1.119432  |
| H203 | -5.000398 | 0.417130  | 0.265775  |
| H204 | -0.106895 | 9.142362  | -3.543128 |
| H205 | 1.268403  | 8.077745  | -3.150996 |
| H206 | -5.119066 | 10.666570 | 0.455235  |
| H207 | -4.373454 | 9.408772  | -0.559459 |
| H208 | -6.416313 | 6.768985  | 2.372632  |
| H209 | 6.764599  | 0.533143  | -5.113654 |
| H210 | 11.195676 | -1.924853 | -3.431073 |
| H211 | 8.104827  | -0.711981 | -2.646391 |
| H212 | 7.031206  | -1.681789 | -3.668496 |
| H213 | -1.432459 | 7.106306  | 0.266741  |
| H214 | -2.564726 | 0.679303  | -7.148581 |
| H215 | -6.613287 | 3.695646  | -4.511031 |
| H216 | -4.860383 | 3.463612  | -4.613850 |
| H217 | -3.241570 | -0.411347 | -5.038806 |
| H218 | 2.793368  | 3.203656  | -4.909827 |
| H219 | 4.633760  | -2.984803 | 5.256533  |
| H220 | 3.521251  | -1.929926 | 4.457102  |
| H221 | 8.997095  | 3.124879  | 0.925386  |
| H222 | 0.097935  | -1.558117 | -7.853007 |
| H223 | -1.346016 | 7.989777  | -1.741985 |
| H224 | -6.457748 | 8.772458  | 1.456469  |
| H225 | -4.807194 | -1.058429 | 4.056284  |
| H226 | -6.342335 | -0.464466 | 3.459911  |
| H227 | -5.758488 | -4.804386 | -1.332071 |
| H228 | -4.709329 | -7.465410 | -4.109454 |
| H229 | -1.079515 | -0.503329 | -0.518132 |
| H230 | -0.434186 | -1.523129 | 3.817278  |
| H231 | 0.970488  | -2.285230 | 3.700543  |
| C232 | 7.861112  | -0.245430 | 2.979090  |
| H233 | 8.125436  | -1.283571 | 2.734401  |
| H234 | 8.699743  | 0.150342  | 3.567553  |
| H235 | 6.936018  | -1.036036 | 0.435111  |
| S236 | 2.549596  | 3.775409  | -1.999271 |
| H237 | 2.380848  | 4.902498  | -1.273025 |
| H238 | 0.611517  | 4.576293  | -3.224051 |
| S239 | -5.598373 | 4.029606  | 3.143888  |
| H240 | -5.145371 | 2.889006  | 2.585333  |
| C241 | 6.599048  | -0.224111 | 3.846014  |
| H242 | 6.297289  | 0.803979  | 4.076686  |
| H243 | 5.752343  | -0.711569 | 3.354083  |
| H244 | 6.771671  | -0.738043 | 4.797656  |
| H245 | 5.702514  | 0.009502  | 1.163067  |

#### 4.4 Mutant R3

The following atoms were kept fixed in the geometry optimizations of reactant and transition state structures: 1, 6, 7, 15, 16, 23, 28, 34, 35, 37, 39, 43, 48, 53, 57, 62, 70, 74, 79.

##### Reactant:

|     |           |           |           |      |           |           |           |
|-----|-----------|-----------|-----------|------|-----------|-----------|-----------|
| C1  | -5.439725 | 6.791634  | 1.225611  | O52  | -2.350637 | -0.065504 | -0.569018 |
| C2  | -4.887551 | 7.631759  | 0.070964  | C53  | -1.808303 | -1.155816 | -7.297696 |
| O3  | -3.797344 | 7.423285  | -0.456159 | C54  | -0.489346 | -0.908556 | -6.591586 |
| C4  | -4.555451 | 5.595343  | 1.559888  | O55  | -0.316946 | 0.036709  | -5.825096 |
| N5  | -5.712540 | 8.645274  | -0.320004 | N56  | 0.472384  | -1.823625 | -6.893383 |
| C6  | -5.368688 | 9.578741  | -1.377532 | C57  | 1.864707  | -1.700357 | -6.498120 |
| C7  | -0.408660 | 7.091332  | -0.508059 | C58  | 2.401205  | -2.869438 | -5.643061 |
| C8  | 0.318266  | 7.049621  | -1.846525 | C59  | 2.369358  | -2.658581 | -4.113897 |
| O9  | 1.468077  | 6.626116  | -1.974075 | C60  | 3.337706  | -1.546866 | -3.680109 |
| C10 | 0.216625  | 6.146585  | 0.524193  | C61  | 0.952050  | -2.407939 | -3.579955 |
| C11 | -0.326668 | 6.306111  | 1.956875  | C62  | -3.002826 | -6.191137 | -4.029215 |
| C12 | 0.138272  | 5.136443  | 2.836610  | C63  | -4.207857 | -5.953887 | -3.129749 |
| C13 | 0.073611  | 7.646121  | 2.593624  | O64  | -4.542617 | -4.827887 | -2.753698 |
| N14 | -0.384252 | 7.569323  | -2.893551 | C65  | -1.683980 | -5.782675 | -3.344180 |
| C15 | 0.162298  | 7.647377  | -4.236268 | C66  | -1.268903 | -6.652540 | -2.140568 |
| C16 | 3.179693  | 1.068841  | 8.964475  | C67  | -0.940073 | -8.098005 | -2.544282 |
| C17 | 1.983254  | 0.530241  | 8.485081  | C68  | -0.077248 | -6.014970 | -1.411458 |
| C18 | 4.151557  | 1.483764  | 8.051014  | N69  | -4.905974 | -7.066051 | -2.775464 |
| C19 | 1.758912  | 0.388278  | 7.115586  | C70  | -6.196417 | -6.982333 | -2.112913 |
| C20 | 3.940447  | 1.351476  | 6.679902  | C71  | -6.178922 | -6.951730 | -0.578035 |
| C21 | 2.744257  | 0.795867  | 6.202884  | O72  | -6.473334 | -7.944439 | 0.080780  |
| O22 | 2.608956  | 0.635260  | 4.857726  | N73  | -5.870972 | -5.741686 | -0.049232 |
| C23 | 2.163701  | -4.811375 | 6.930690  | C74  | -5.963923 | -5.482986 | 1.380792  |
| C24 | 3.296427  | -4.361105 | 6.000877  | C75  | -4.948490 | -4.445921 | 1.874989  |
| C25 | 2.879366  | -3.138577 | 5.195335  | C76  | -3.500620 | -4.932810 | 1.673549  |
| N26 | 3.757590  | -2.112033 | 5.134702  | C77  | -5.264555 | -4.109307 | 3.337729  |
| O27 | 1.787369  | -3.124161 | 4.611856  | C78  | -2.446186 | -3.825681 | 1.754527  |
| C28 | 9.128447  | 0.870754  | 1.075507  | C79  | -2.682326 | -3.840344 | 6.623948  |
| C29 | 8.963186  | 1.536578  | -0.272178 | C80  | -2.019794 | -2.499043 | 6.274074  |
| O30 | 8.588259  | 0.940951  | -1.280940 | C81  | -2.794023 | -1.664459 | 5.240054  |
| C31 | 7.869284  | 0.976486  | 1.974303  | O82  | -4.047714 | -1.628265 | 5.320831  |
| C32 | 6.665501  | 0.266261  | 1.338750  | O83  | -2.109509 | -1.038928 | 4.358035  |
| N33 | 9.254579  | 2.867982  | -0.262922 | O84  | 0.529288  | -0.710868 | 4.124376  |
| C34 | 9.057693  | 3.707088  | -1.418397 | H85  | -4.429493 | 4.957065  | 0.684377  |
| C35 | 7.907609  | 0.124123  | -4.863204 | H86  | -3.571452 | 5.933979  | 1.885230  |
| C36 | 8.730371  | -1.116984 | -4.476346 | H87  | -5.550831 | 7.436303  | 2.107034  |
| C37 | 1.790549  | 2.784979  | -4.986150 | H88  | -6.018763 | 9.455347  | -2.251074 |
| C38 | 1.489240  | 3.852574  | -3.940992 | H89  | 0.051164  | 5.113322  | 0.193638  |
| C39 | -5.671846 | 2.950990  | -4.381917 | H90  | 1.302996  | 6.293307  | 0.526327  |
| C40 | -4.974844 | 4.022014  | -3.533210 | H91  | -1.425337 | 6.274678  | 1.905443  |
| C41 | -5.704414 | 4.208070  | -2.194720 | H92  | -0.254423 | 5.220078  | 3.855630  |
| C42 | -3.486936 | 3.668275  | -3.343631 | H93  | -0.188277 | 4.173893  | 2.428481  |
| C43 | -6.932931 | 0.594803  | 1.081253  | H94  | 1.232417  | 5.110932  | 2.905123  |
| N44 | -5.495301 | 0.405517  | 1.145667  | H95  | -0.330023 | 7.733916  | 3.608223  |
| C45 | -4.817011 | 0.046104  | 2.253733  | H96  | -0.291133 | 8.505225  | 2.021495  |
| N46 | -5.445343 | -0.182173 | 3.417405  | H97  | 1.165000  | 7.730792  | 2.662731  |
| N47 | -3.488873 | -0.048640 | 2.211253  | H98  | -0.346913 | 8.131043  | -0.156611 |
| C48 | -3.655408 | -0.978061 | -3.960575 | H99  | -0.253337 | 6.874234  | -4.894807 |
| C49 | -2.581872 | -0.570819 | -2.947347 | H100 | 1.214144  | 0.210117  | 9.183129  |
| C50 | -3.155734 | -0.068007 | -1.637152 | H101 | 5.083216  | 1.915331  | 8.407498  |
| O51 | -4.300380 | 0.348538  | -1.516179 | H102 | 0.837415  | -0.044299 | 6.739438  |
|     |           |           |           | H103 | 4.687079  | 1.673943  | 5.961209  |

|      |           |           |           |      |           |           |           |
|------|-----------|-----------|-----------|------|-----------|-----------|-----------|
| H104 | 1.707006  | 0.250900  | 4.624521  | H164 | -2.960226 | -0.388051 | 3.048168  |
| H105 | 3.524691  | -5.157331 | 5.281585  | C165 | 0.234579  | -1.414404 | 1.012373  |
| H106 | 4.216091  | -4.166116 | 6.563721  | C166 | 0.724674  | -0.090657 | 0.633813  |
| H107 | 1.252432  | -4.978759 | 6.353253  | O167 | 0.082072  | -0.946305 | -0.377267 |
| H108 | 7.621615  | 2.044560  | 2.075739  | C168 | 2.233550  | -0.110716 | 0.567323  |
| H109 | 6.491042  | 0.611929  | 0.317055  | C169 | 1.401735  | -2.361224 | 1.171873  |
| H110 | 9.358746  | -0.183743 | 0.893235  | C170 | 2.589813  | -1.618100 | 0.506616  |
| H111 | 8.213061  | 4.394265  | -1.286577 | H171 | 0.180103  | 0.824143  | 0.850044  |
| H112 | 2.158478  | 4.708630  | -4.044098 | H172 | 2.630535  | 0.461800  | -0.276199 |
| H113 | 1.106172  | 1.934226  | -4.924339 | H173 | 3.540911  | -1.836222 | 0.999542  |
| H114 | -5.024786 | 4.977518  | -4.078722 | H174 | 2.601381  | 0.349201  | 1.492955  |
| H115 | -5.284506 | 5.040661  | -1.623003 | H175 | 2.684413  | -1.930116 | -0.535558 |
| H116 | -6.769415 | 4.413633  | -2.353243 | H176 | 1.563389  | -2.519091 | 2.242174  |
| H117 | -5.625789 | 3.300580  | -1.583816 | H177 | 1.208838  | -3.339285 | 0.718261  |
| H118 | -3.032989 | 3.542447  | -4.335596 | H178 | -0.695267 | -1.565719 | 1.550075  |
| H119 | -3.425698 | 2.689346  | -2.850822 | H179 | 1.687327  | 3.212752  | -5.990241 |
| H120 | -5.670324 | 1.987812  | -3.857551 | H180 | 7.469146  | 0.583313  | -3.972619 |
| H121 | -1.949496 | 0.226731  | -3.360080 | H181 | 9.231498  | -1.517043 | -5.366411 |
| H122 | -1.900779 | -1.402469 | -2.735174 | H182 | 9.955696  | 4.295302  | -1.636079 |
| H123 | -4.354474 | -0.158653 | -4.139777 | H183 | 8.845072  | 3.053988  | -2.265008 |
| H124 | -2.208960 | -2.146849 | -7.058842 | H184 | 9.986031  | 1.306987  | 1.603342  |
| H125 | 1.842444  | -3.779329 | -5.902825 | H185 | 3.346869  | 1.173236  | 10.032082 |
| H126 | 3.441483  | -3.058316 | -5.936054 | H186 | 2.430308  | -5.738387 | 7.446242  |
| H127 | 2.738366  | -3.595889 | -3.672499 | H187 | 1.950439  | -4.050597 | 7.687997  |
| H128 | 3.405590  | -1.494167 | -2.589545 | H188 | -2.135877 | -4.349254 | 7.424599  |
| H129 | 3.008308  | -0.560976 | -4.026588 | H189 | -3.713307 | -3.678554 | 6.947383  |
| H130 | 4.348140  | -1.725548 | -4.061842 | H190 | -6.980746 | -5.144270 | 1.627993  |
| H131 | 0.952786  | -2.301258 | -2.491031 | H191 | -6.782005 | -7.860737 | -2.389821 |
| H132 | 0.532726  | -1.484925 | -3.992755 | H192 | -3.155156 | -5.564384 | -4.914705 |
| H133 | 0.277852  | -3.232472 | -3.841130 | H193 | 2.470494  | -1.611897 | -7.409540 |
| H134 | 1.948570  | -0.749559 | -5.969564 | H194 | -1.682790 | -1.101487 | -8.384952 |
| H135 | -1.791624 | -4.742600 | -3.016600 | H195 | -4.221415 | -1.844819 | -3.605862 |
| H136 | -0.878808 | -5.797148 | -4.090840 | H196 | -3.017413 | 0.072924  | 1.322294  |
| H137 | -2.113122 | -6.680979 | -1.436239 | H197 | -4.973852 | 0.491470  | 0.270428  |
| H138 | -0.645452 | -8.689304 | -1.671309 | H198 | -0.039289 | 8.628396  | -4.677671 |
| H139 | -1.790559 | -8.608860 | -3.008381 | H199 | 1.239320  | 7.499189  | -4.162347 |
| H140 | -0.108478 | -8.123667 | -3.259276 | H200 | -5.442888 | 10.613053 | -1.026046 |
| H141 | 0.211498  | -6.605018 | -0.535319 | H201 | -4.339553 | 9.374571  | -1.672050 |
| H142 | -0.314789 | -5.001533 | -1.071981 | H202 | -6.449755 | 6.454108  | 0.959229  |
| H143 | 0.797058  | -5.948724 | -2.070489 | H203 | 7.095911  | -0.137655 | -5.550367 |
| H144 | -2.964734 | -7.229806 | -4.373965 | H204 | -1.476839 | 6.883985  | -0.633588 |
| H145 | -6.700616 | -6.086198 | -2.488367 | H205 | -2.525897 | -0.396569 | -6.989690 |
| H146 | -5.085280 | -3.531836 | 1.273386  | H206 | -6.714373 | 3.216658  | -4.588669 |
| H147 | -6.298166 | -3.759891 | 3.445861  | H207 | -5.165230 | 2.810143  | -5.343613 |
| H148 | -4.618645 | -3.332409 | 3.748512  | H208 | -3.183235 | -1.245312 | -4.906781 |
| H149 | -5.155020 | -5.001001 | 3.967363  | H209 | 2.815682  | 2.414886  | -4.883093 |
| H150 | -3.425108 | -5.419625 | 0.693399  | H210 | 4.540542  | -2.088270 | 5.769201  |
| H151 | -3.284778 | -5.711505 | 2.418380  | H211 | 3.441222  | -1.212796 | 4.771118  |
| H152 | -2.623077 | -3.067095 | 0.982452  | H212 | 9.515978  | 3.295760  | 0.611909  |
| H153 | -1.441715 | -4.233097 | 1.597555  | H213 | 0.236770  | -2.551229 | -7.552305 |
| H154 | -2.447059 | -3.314889 | 2.721474  | H214 | -1.350046 | 7.817285  | -2.737211 |
| H155 | -5.820580 | -6.441068 | 1.889702  | H215 | -6.593592 | 8.760025  | 0.158122  |
| H156 | -1.947658 | -1.884109 | 7.182151  | H216 | -4.914909 | -0.668971 | 4.180894  |
| H157 | -0.998301 | -2.649558 | 5.912253  | H217 | -6.448903 | -0.260850 | 3.417142  |
| H158 | -2.705394 | -4.507087 | 5.755747  | H218 | -5.608068 | -4.999442 | -0.688863 |
| H159 | 8.539803  | 0.872805  | -5.353441 | H219 | -4.572793 | -7.972332 | -3.064414 |
| H160 | 9.517057  | -0.808970 | -3.778228 | H220 | -1.419083 | -0.434933 | -0.688797 |
| H161 | -7.486458 | -0.328733 | 1.300019  | H221 | -0.446717 | -0.774344 | 4.297839  |
| H162 | -7.266399 | 1.382275  | 1.767233  | H222 | 0.886027  | -1.611416 | 4.267127  |
| H163 | -7.183440 | 0.900520  | 0.065177  | C223 | 8.198191  | 0.437991  | 3.381358  |

|      |           |           |           |     |           |           |           |
|------|-----------|-----------|-----------|-----|-----------|-----------|-----------|
| H224 | 8.433912  | -0.632754 | 3.302937  | C28 | 9.153042  | 0.387906  | 1.150742  |
| H225 | 9.115829  | 0.924691  | 3.738578  | C29 | 9.028957  | 1.137098  | -0.156622 |
| H226 | 6.838389  | -0.816198 | 1.293810  | O30 | 8.617706  | 0.619381  | -1.194136 |
| S227 | 1.710400  | 3.190147  | -2.226840 | C31 | 7.870678  | 0.448308  | 2.020424  |
| H228 | 1.749054  | 4.401958  | -1.633732 | C32 | 6.675901  | -0.200373 | 1.306540  |
| H229 | 0.461778  | 4.212044  | -4.045416 | N33 | 9.379442  | 2.450288  | -0.071053 |
| S230 | -5.351100 | 4.630190  | 2.920232  | C34 | 9.232635  | 3.360465  | -1.178831 |
| H231 | -4.316468 | 3.797845  | 3.149464  | C35 | 7.931773  | 0.037056  | -4.824339 |
| C232 | 7.891517  | -2.205678 | -3.839416 | C36 | 8.641149  | -1.291854 | -4.511849 |
| C233 | 7.540892  | -2.130995 | -2.482360 | C37 | 1.950148  | 2.992349  | -4.814813 |
| H234 | 7.890160  | -1.287781 | -1.891087 | C38 | 1.895823  | 4.093538  | -3.761084 |
| C235 | 7.427572  | -3.293448 | -4.590703 | C39 | -5.499032 | 3.483507  | -4.224515 |
| H236 | 7.697804  | -3.368066 | -5.641870 | C40 | -4.584145 | 4.377010  | -3.379005 |
| C237 | 6.748913  | -3.120665 | -1.899229 | C41 | -5.277491 | 4.741650  | -2.058558 |
| H238 | 6.487844  | -3.048953 | -0.846704 | C42 | -3.221619 | 3.691063  | -3.160047 |
| C239 | 6.290727  | -4.199961 | -2.658561 | C43 | -6.902861 | 0.886530  | 1.092735  |
| H240 | 5.675428  | -4.969913 | -2.201424 | N44 | -5.489223 | 0.568341  | 1.104550  |
| C241 | 6.631956  | -4.283013 | -4.008950 | C45 | -4.808177 | 0.161713  | 2.187223  |
| H242 | 6.284641  | -5.120116 | -4.608868 | N46 | -5.392730 | 0.063568  | 3.400537  |
| C243 | -2.676385 | 4.691931  | -2.545053 | N47 | -3.507882 | -0.100845 | 2.074361  |
| H244 | -2.962376 | 4.719912  | -1.490059 | C48 | -3.675763 | -0.555665 | -4.020190 |
| H245 | -1.606057 | 4.465854  | -2.588671 | C49 | -2.629338 | -0.425588 | -2.904682 |
| H246 | -2.823985 | 5.705001  | -2.936019 | C50 | -3.187551 | -0.123303 | -1.516659 |
| H247 | 5.751336  | 0.437818  | 1.913858  | O51 | -4.320749 | 0.383509  | -1.402228 |
| C248 | 7.094017  | 0.646536  | 4.422364  | O52 | -2.433015 | -0.397675 | -0.498904 |
| H249 | 6.182133  | 0.099402  | 4.166367  | C53 | -1.820266 | -0.633783 | -7.356476 |
| H250 | 7.420541  | 0.302931  | 5.409389  | C54 | -0.477236 | -0.455640 | -6.675872 |
| H251 | 6.828319  | 1.706069  | 4.513008  | O55 | -0.221141 | 0.508241  | -5.960060 |

### TS attack at C1:

|     |           |           |           |     |           |           |           |
|-----|-----------|-----------|-----------|-----|-----------|-----------|-----------|
| C1  | -5.115071 | 6.986177  | 1.592071  | C61 | 0.820654  | -1.948409 | -3.654810 |
| C2  | -4.547851 | 7.827403  | 0.446376  | C62 | -3.273533 | -5.781962 | -4.381822 |
| O3  | -3.529744 | 7.523240  | -0.172228 | C63 | -4.464708 | -5.542996 | -3.463378 |
| C4  | -4.464978 | 5.608735  | 1.686196  | O64 | -4.747594 | -4.427379 | -3.022837 |
| N5  | -5.264073 | 8.957490  | 0.183103  | C65 | -1.949167 | -5.329760 | -3.740668 |
| C6  | -4.895588 | 9.908971  | -0.848928 | C66 | -1.513502 | -6.124646 | -2.493595 |
| C7  | -0.065595 | 7.140317  | -0.106776 | C67 | -1.237848 | -7.604707 | -2.798602 |
| C8  | 0.689115  | 7.188040  | -1.430440 | C68 | -0.280560 | -5.470005 | -1.854115 |
| O9  | 1.864573  | 6.837267  | -1.545883 | N69 | -5.220543 | -6.638585 | -3.179810 |
| C10 | 0.530654  | 6.117186  | 0.865892  | C70 | -6.512290 | -6.525109 | -2.522951 |
| C11 | -0.073251 | 6.144827  | 2.283003  | C71 | -6.507984 | -6.585973 | -0.988375 |
| C12 | 0.414146  | 4.934572  | 3.092944  | O72 | -6.884773 | -7.590882 | -0.392602 |
| C13 | 0.238244  | 7.450102  | 3.030918  | N73 | -6.117296 | -5.434307 | -0.387503 |
| N14 | -0.021273 | 7.705868  | -2.473829 | C74 | -6.228146 | -5.238111 | 1.050696  |
| C15 | 0.552672  | 7.877543  | -3.795809 | C75 | -5.084519 | -4.402097 | 1.636231  |
| C16 | 3.175631  | 0.427315  | 9.020407  | C76 | -3.732108 | -5.129162 | 1.507394  |
| C17 | 1.937820  | -0.019097 | 8.551682  | C77 | -5.423474 | -4.037324 | 3.087065  |
| C18 | 4.162746  | 0.784703  | 8.098792  | C78 | -2.521086 | -4.194438 | 1.562912  |
| C19 | 1.686141  | -0.127850 | 7.182533  | C79 | -2.901574 | -4.053819 | 6.388229  |
| C20 | 3.924796  | 0.684733  | 6.729462  | C80 | -2.057081 | -2.835430 | 5.987929  |
| C21 | 2.686820  | 0.220823  | 6.267331  | C81 | -2.773463 | -1.852985 | 5.045338  |
| O22 | 2.531689  | 0.087473  | 4.914212  | O82 | -4.006847 | -1.691632 | 5.165166  |
| C23 | 1.890481  | -5.273045 | 6.654040  | O83 | -2.050326 | -1.232526 | 4.181175  |
| C24 | 2.872500  | -5.009470 | 5.500336  | O84 | 0.433665  | -1.028107 | 3.704656  |
| C25 | 2.588208  | -3.667857 | 4.844852  | H85 | -4.635487 | 5.042455  | 0.770478  |
| N26 | 3.537360  | -2.714083 | 4.960218  | H86 | -3.389542 | 5.712620  | 1.833620  |
| O27 | 1.519890  | -3.480848 | 4.242219  | H87 | -4.962297 | 7.537249  | 2.529569  |

|      |           |           |           |      |           |           |           |
|------|-----------|-----------|-----------|------|-----------|-----------|-----------|
| H88  | -5.652471 | 9.955154  | -1.639851 | H148 | -4.662042 | -3.411323 | 3.554143  |
| H89  | 0.397534  | 5.114576  | 0.440387  | H149 | -5.535110 | -4.943048 | 3.696170  |
| H90  | 1.613426  | 6.278976  | 0.925689  | H150 | -3.711156 | -5.672098 | 0.554535  |
| H91  | -1.166743 | 6.065347  | 2.187000  | H151 | -3.660653 | -5.891240 | 2.295816  |
| H92  | -0.028797 | 4.919394  | 4.094546  | H152 | -2.564372 | -3.477422 | 0.734269  |
| H93  | 0.156041  | 3.992778  | 2.596924  | H153 | -1.584921 | -4.756988 | 1.477148  |
| H94  | 1.504219  | 4.958485  | 3.212072  | H154 | -2.479429 | -3.617103 | 2.492212  |
| H95  | -0.195075 | 7.438044  | 4.036961  | H155 | -6.259438 | -6.232836 | 1.504911  |
| H96  | -0.158431 | 8.329763  | 2.514214  | H156 | -1.790513 | -2.264787 | 6.889374  |
| H97  | 1.321540  | 7.586423  | 3.137135  | H157 | -1.113710 | -3.143821 | 5.525188  |
| H98  | -0.002510 | 8.151231  | 0.318881  | H158 | -3.113323 | -4.688131 | 5.521735  |
| H99  | 0.165393  | 7.140287  | -4.509220 | H159 | 8.628659  | 0.753902  | -5.272535 |
| H100 | 1.156344  | -0.291367 | 9.255562  | H160 | 9.450338  | -1.096295 | -3.798840 |
| H101 | 5.126751  | 1.145773  | 8.446530  | H161 | -7.529695 | 0.035099  | 1.394263  |
| H102 | 0.725533  | -0.484246 | 6.820900  | H162 | -7.135612 | 1.741527  | 1.739991  |
| H103 | 4.680653  | 0.965382  | 6.003329  | H163 | -7.174466 | 1.151736  | 0.070300  |
| H104 | 1.617765  | -0.201645 | 4.652647  | H164 | -2.996244 | -0.488942 | 2.883752  |
| H105 | 2.749308  | -5.776969 | 4.729187  | C165 | 0.133153  | -1.725455 | 0.890390  |
| H106 | 3.908122  | -5.061498 | 5.853721  | C166 | 0.408391  | -0.451632 | 1.565628  |
| H107 | 0.861236  | -5.231083 | 6.290354  | O167 | -0.036808 | -0.881159 | -0.262230 |
| H108 | 7.633729  | 1.510306  | 2.188715  | C168 | 1.851324  | -0.084028 | 1.414752  |
| H109 | 6.530539  | 0.218251  | 0.308350  | C169 | 1.457774  | -2.466646 | 0.815749  |
| H110 | 9.380012  | -0.655724 | 0.909564  | C170 | 2.525443  | -1.338906 | 0.786257  |
| H111 | 8.458450  | 4.112993  | -0.987519 | H171 | -0.379793 | 0.238068  | 1.835684  |
| H112 | 2.613520  | 4.885711  | -3.986868 | H172 | 1.942675  | 0.803237  | 0.780291  |
| H113 | 1.196910  | 2.217296  | -4.655927 | H173 | 3.428495  | -1.626451 | 1.330602  |
| H114 | -4.406212 | 5.310409  | -3.936400 | H174 | 2.254500  | 0.184650  | 2.394454  |
| H115 | -4.697888 | 5.462284  | -1.475614 | H175 | 2.818092  | -1.118877 | -0.241799 |
| H116 | -6.265133 | 5.180837  | -2.243183 | H176 | 1.559847  | -3.092404 | 1.708072  |
| H117 | -5.423844 | 3.842060  | -1.446834 | H177 | 1.500252  | -3.114264 | -0.064033 |
| H118 | -2.820753 | 3.398857  | -4.140064 | H178 | -0.759783 | -2.286170 | 1.159475  |
| H119 | -3.383224 | 2.754093  | -2.610694 | H179 | 1.763625  | 3.421689  | -5.805654 |
| H120 | -5.698162 | 2.538433  | -3.705031 | H180 | 7.531792  | 0.481786  | -3.908708 |
| H121 | -1.922797 | 0.378820  | -3.150448 | H181 | 9.108176  | -1.681590 | -5.424633 |
| H122 | -2.022475 | -1.334385 | -2.833877 | H182 | 10.174563 | 3.876047  | -1.396226 |
| H123 | -4.274193 | 0.353275  | -4.108520 | H183 | 8.940023  | 2.772774  | -2.048999 |
| H124 | -2.265363 | -1.605933 | -7.120523 | H184 | 9.998820  | 0.780373  | 1.729634  |
| H125 | 1.722584  | -3.451494 | -5.910470 | H185 | 3.362881  | 0.505870  | 10.086517 |
| H126 | 3.341133  | -2.774324 | -5.925520 | H186 | 2.065871  | -6.261290 | 7.087802  |
| H127 | 2.543144  | -3.230300 | -3.667254 | H187 | 2.003330  | -4.528283 | 7.448108  |
| H128 | 3.249411  | -1.107934 | -2.621249 | H188 | -2.380733 | -4.663385 | 7.133942  |
| H129 | 2.993352  | -0.230681 | -4.122314 | H189 | -3.858553 | -3.729090 | 6.802651  |
| H130 | 4.261962  | -1.469448 | -4.023164 | H190 | -7.188035 | -4.752924 | 1.281487  |
| H131 | 0.804164  | -1.814879 | -2.568586 | H191 | -7.140773 | -7.353415 | -2.854594 |
| H132 | 0.461820  | -1.014669 | -4.097915 | H192 | -3.457322 | -5.184377 | -5.282228 |
| H133 | 0.107085  | -2.740001 | -3.912159 | H193 | 2.410282  | -1.403559 | -7.502681 |
| H134 | 1.971838  | -0.426805 | -6.106651 | H194 | -1.708612 | -0.571480 | -8.445049 |
| H135 | -2.058050 | -4.273770 | -3.470365 | H195 | -4.349046 | -1.396914 | -3.830210 |
| H136 | -1.154795 | -5.384574 | -4.497310 | H196 | -3.102799 | -0.153408 | 1.128488  |
| H137 | -2.332911 | -6.075140 | -1.761909 | H197 | -4.993246 | 0.549869  | 0.190246  |
| H138 | -0.914596 | -8.134726 | -1.896695 | H198 | 0.344466  | 8.881266  | -4.180991 |
| H139 | -2.122881 | -8.125748 | -3.178240 | H199 | 1.630293  | 7.742408  | -3.704371 |
| H140 | -0.442960 | -7.708828 | -3.547650 | H200 | -4.760195 | 10.912259 | -0.431071 |
| H141 | 0.014265  | -5.994418 | -0.938884 | H201 | -3.953273 | 9.572933  | -1.281105 |
| H142 | -0.474542 | -4.423574 | -1.598481 | H202 | -6.200218 | 6.886692  | 1.463819  |
| H143 | 0.575195  | -5.491783 | -2.540200 | H203 | 7.102145  | -0.112492 | -5.523446 |
| H144 | -3.223961 | -6.828865 | -4.699927 | H204 | -1.131184 | 6.950252  | -0.274861 |
| H145 | -6.964640 | -5.582430 | -2.847188 | H205 | -2.492857 | 0.156910  | -7.027232 |
| H146 | -5.023944 | -3.468015 | 1.054887  | H206 | -6.462773 | 3.966855  | -4.422385 |
| H147 | -6.369162 | -3.486162 | 3.144228  | H207 | -5.041806 | 3.241628  | -5.190640 |

|      |           |           |           |     |           |           |           |
|------|-----------|-----------|-----------|-----|-----------|-----------|-----------|
| H208 | -3.154467 | -0.733397 | -4.962840 | C12 | 0.165452  | 4.638932  | 3.050508  |
| H209 | 2.937409  | 2.518917  | -4.836847 | C13 | 0.024545  | 7.153240  | 3.193398  |
| H210 | 4.327293  | -2.857446 | 5.569492  | N14 | -0.246894 | 7.691475  | -2.330603 |
| H211 | 3.307752  | -1.751538 | 4.714733  | C15 | 0.303162  | 7.908373  | -3.656001 |
| H212 | 9.682767  | 2.810441  | 0.820318  | C16 | 3.304251  | 0.302405  | 8.984572  |
| H213 | 0.119349  | -2.191049 | -7.566379 | C17 | 2.073594  | -0.155495 | 8.506034  |
| H214 | -1.002662 | 7.894620  | -2.330886 | C18 | 4.271691  | 0.719375  | 8.066255  |
| H215 | -6.102328 | 9.127690  | 0.718189  | C19 | 1.811069  | -0.219306 | 7.134661  |
| H216 | -4.904273 | -0.509306 | 4.114832  | C20 | 4.022910  | 0.665002  | 6.695687  |
| H217 | -6.397964 | 0.100552  | 3.449117  | C21 | 2.793307  | 0.186699  | 6.223257  |
| H218 | -5.801649 | -4.675916 | -0.983811 | O22 | 2.641165  | 0.095518  | 4.864377  |
| H219 | -4.936512 | -7.540562 | -3.528325 | C23 | 2.117093  | -5.385286 | 6.537885  |
| H220 | -1.081304 | -0.682952 | -0.443429 | C24 | 3.255408  | -4.931609 | 5.616239  |
| H221 | -0.551873 | -1.123685 | 3.982121  | C25 | 2.897284  | -3.627606 | 4.925049  |
| H222 | 0.810573  | -1.938118 | 3.792658  | N26 | 3.812497  | -2.637366 | 4.951414  |
| C223 | 8.153493  | -0.191841 | 3.394396  | O27 | 1.802761  | -3.512717 | 4.349835  |
| H224 | 8.385193  | -1.256213 | 3.247122  | C28 | 9.155614  | 0.542319  | 1.024252  |
| H225 | 9.062019  | 0.260210  | 3.814664  | C29 | 8.997209  | 1.309595  | -0.269250 |
| H226 | 6.838574  | -1.279162 | 1.190145  | O30 | 8.583730  | 0.800037  | -1.309762 |
| S227 | 2.307501  | 3.431610  | -2.082272 | C31 | 7.900160  | 0.600176  | 1.931777  |
| H228 | 2.319793  | 4.636195  | -1.470428 | C32 | 6.681717  | -0.034221 | 1.245916  |
| H229 | 0.898467  | 4.538569  | -3.720717 | N33 | 9.320649  | 2.628595  | -0.166542 |
| S230 | -5.205445 | 4.699234  | 3.113721  | C34 | 9.127943  | 3.555802  | -1.253358 |
| H231 | -4.478255 | 3.572478  | 2.979719  | C35 | 7.848574  | 0.265786  | -4.936566 |
| C232 | 7.709629  | -2.339758 | -3.938377 | C36 | 8.581462  | -1.056917 | -4.653408 |
| C233 | 7.345332  | -2.303817 | -2.583469 | C37 | 1.799573  | 3.076405  | -4.782620 |
| H234 | 7.752729  | -1.522738 | -1.945901 | C38 | 1.741192  | 4.172481  | -3.723099 |
| C235 | 7.171514  | -3.348780 | -4.747890 | C39 | -5.648869 | 3.378778  | -4.069002 |
| H236 | 7.448905  | -3.392659 | -5.798879 | C40 | -4.716017 | 4.353702  | -3.337539 |
| C237 | 6.468949  | -3.254348 | -2.059028 | C41 | -5.473375 | 5.062633  | -2.205243 |
| H238 | 6.198631  | -3.213511 | -1.006947 | C42 | -3.457240 | 3.612819  | -2.844993 |
| C239 | 5.940499  | -4.257354 | -2.875226 | C43 | -6.906500 | 0.657304  | 1.222510  |
| H240 | 5.262900  | -4.999957 | -2.462981 | N44 | -5.480280 | 0.395107  | 1.206286  |
| C241 | 6.294351  | -4.301136 | -4.224387 | C45 | -4.765607 | 0.002019  | 2.272627  |
| H242 | 5.894785  | -5.080319 | -4.868152 | N46 | -5.330083 | -0.150149 | 3.490305  |
| C243 | -2.174369 | 4.542626  | -2.436324 | N47 | -3.453764 | -0.185646 | 2.141089  |
| H244 | -2.497413 | 4.827342  | -1.430181 | C48 | -3.727498 | -0.618514 | -3.964234 |
| H245 | -1.228773 | 3.999514  | -2.337248 | C49 | -2.664909 | -0.420197 | -2.875873 |
| H246 | -1.969194 | 5.469334  | -2.986110 | C50 | -3.223553 | -0.152112 | -1.476375 |
| H247 | 5.749815  | -0.057608 | 1.870838  | O51 | -4.383809 | 0.287106  | -1.344831 |
| C248 | 7.018176  | -0.049978 | 4.412957  | O52 | -2.442753 | -0.384186 | -0.469629 |
| H249 | 6.107983  | -0.563052 | 4.087762  | C53 | -1.923706 | -0.594433 | -7.329578 |
| H250 | 7.308342  | -0.470486 | 5.381435  | C54 | -0.565217 | -0.374785 | -6.690335 |
| H251 | 6.763481  | 1.004229  | 4.572661  | O55 | -0.295678 | 0.626614  | -6.033555 |

### TS attack at C2:

|     |           |          |           |     |           |           |           |
|-----|-----------|----------|-----------|-----|-----------|-----------|-----------|
| C1  | -5.255907 | 6.788452 | 1.801984  | C61 | 0.807140  | -1.880511 | -3.681220 |
| C2  | -4.732674 | 7.667929 | 0.666163  | C62 | -3.207449 | -5.826640 | -4.424354 |
| O3  | -3.693546 | 7.422248 | 0.055225  | C63 | -4.391162 | -5.634434 | -3.484819 |
| C4  | -4.743753 | 5.353040 | 1.699729  | O64 | -4.698039 | -4.533658 | -3.023504 |
| N5  | -5.496749 | 8.766252 | 0.409599  | C65 | -1.894974 | -5.308646 | -3.810216 |
| C6  | -5.144331 | 9.757468 | -0.590057 | C66 | -1.364037 | -6.119979 | -2.610513 |
| C7  | -0.239017 | 7.092825 | 0.028514  | C67 | -0.944654 | -7.545054 | -3.002134 |
| C8  | 0.499477  | 7.198308 | -1.300266 | C68 | -0.194819 | -5.380529 | -1.944340 |
| O9  | 1.689692  | 6.907618 | -1.430993 | N69 | -5.117473 | -6.752605 | -3.213003 |
| C10 | 0.342986  | 5.999073 | 0.930921  | C70 | -6.397882 | -6.679178 | -2.529218 |
| C11 | -0.288697 | 5.918890 | 2.333790  | C71 | -6.349504 | -6.768102 | -0.997560 |

|      |           |           |           |      |           |           |           |
|------|-----------|-----------|-----------|------|-----------|-----------|-----------|
| O72  | -6.608801 | -7.814778 | -0.410971 | H132 | 0.422139  | -0.934444 | -4.074039 |
| N73  | -6.057327 | -5.593909 | -0.385808 | H133 | 0.111709  | -2.674585 | -3.976617 |
| C74  | -6.087753 | -5.447779 | 1.061816  | H134 | 1.890297  | -0.304962 | -6.165050 |
| C75  | -5.021666 | -4.476823 | 1.589009  | H135 | -2.068566 | -4.273639 | -3.496186 |
| C76  | -3.599004 | -4.985515 | 1.286312  | H136 | -1.124338 | -5.279942 | -4.592285 |
| C77  | -5.265683 | -4.243194 | 3.085608  | H137 | -2.173655 | -6.195932 | -1.869880 |
| C78  | -2.502783 | -3.923192 | 1.418629  | H138 | -0.567080 | -8.093889 | -2.133115 |
| C79  | -2.706084 | -4.276729 | 6.367551  | H139 | -1.774472 | -8.127663 | -3.415643 |
| C80  | -1.895668 | -3.027270 | 5.987355  | H140 | -0.146121 | -7.523664 | -3.754231 |
| C81  | -2.635846 | -2.044446 | 5.061665  | H141 | 0.174485  | -5.933132 | -1.073456 |
| O82  | -3.868436 | -1.897126 | 5.203813  | H142 | -0.493372 | -4.381461 | -1.611407 |
| O83  | -1.932817 | -1.405674 | 4.193042  | H143 | 0.643126  | -5.261699 | -2.642162 |
| O84  | 0.548262  | -1.218395 | 3.659522  | H144 | -3.117015 | -6.872498 | -4.737152 |
| H85  | -5.083024 | 4.890814  | 0.771920  | H145 | -6.877463 | -5.742395 | -2.828995 |
| H86  | -3.653542 | 5.349561  | 1.707775  | H146 | -5.156387 | -3.516699 | 1.065034  |
| H87  | -4.922447 | 7.232223  | 2.749205  | H147 | -6.285302 | -3.882642 | 3.265021  |
| H88  | -5.882894 | 9.789668  | -1.398881 | H148 | -4.586250 | -3.507863 | 3.518678  |
| H89  | 0.216766  | 5.031737  | 0.428431  | H149 | -5.148543 | -5.179927 | 3.644735  |
| H90  | 1.424665  | 6.154249  | 1.020886  | H150 | -3.578180 | -5.383941 | 0.264887  |
| H91  | -1.380966 | 5.865229  | 2.209447  | H151 | -3.380416 | -5.833942 | 1.950132  |
| H92  | -0.297899 | 4.548477  | 4.038787  | H152 | -2.669679 | -3.097580 | 0.716788  |
| H93  | -0.095788 | 3.745200  | 2.473552  | H153 | -1.521115 | -4.357861 | 1.197349  |
| H94  | 1.253126  | 4.635828  | 3.191918  | H154 | -2.459699 | -3.497682 | 2.425812  |
| H95  | -0.436655 | 7.068502  | 4.183487  | H155 | -5.951410 | -6.446640 | 1.487311  |
| H96  | -0.342155 | 8.079430  | 2.739697  | H156 | -1.647681 | -2.465670 | 6.899657  |
| H97  | 1.106713  | 7.259089  | 3.338972  | H157 | -0.942489 | -3.303340 | 5.524302  |
| H98  | -0.146037 | 8.074383  | 0.512260  | H158 | -2.897382 | -4.903701 | 5.491025  |
| H99  | -0.059424 | 7.164803  | -4.376032 | H159 | 8.528872  | 0.999809  | -5.382415 |
| H100 | 1.304157  | -0.473386 | 9.204065  | H160 | 9.397035  | -0.860055 | -3.948079 |
| H101 | 5.230055  | 1.092104  | 8.417309  | H161 | -7.494338 | -0.222744 | 1.519967  |
| H102 | 0.855383  | -0.586186 | 6.770156  | H162 | -7.160772 | 1.492544  | 1.886994  |
| H103 | 4.766889  | 0.991588  | 5.976456  | H163 | -7.204091 | 0.926448  | 0.208340  |
| H104 | 1.742819  | -0.212460 | 4.591053  | H164 | -2.915350 | -0.581717 | 2.927212  |
| H105 | 3.415513  | -5.679227 | 4.829948  | C165 | 0.348944  | -1.461400 | 1.517978  |
| H106 | 4.197626  | -4.837582 | 6.167034  | C166 | 0.379858  | -0.089394 | 0.984293  |
| H107 | 1.187094  | -5.468594 | 5.972232  | O167 | -0.011227 | -0.720402 | -0.248218 |
| H108 | 7.673223  | 1.661281  | 2.118242  | C168 | 1.843910  | 0.314069  | 0.933015  |
| H109 | 6.512430  | 0.392938  | 0.254984  | C169 | 1.657355  | -2.139836 | 1.228016  |
| H110 | 9.369328  | -0.499130 | 0.763123  | C170 | 2.579540  | -1.022374 | 0.661706  |
| H111 | 8.324052  | 4.270806  | -1.041543 | H171 | -0.339257 | 0.644937  | 1.348944  |
| H112 | 2.358725  | 5.026781  | -4.010842 | H172 | 2.029283  | 1.069050  | 0.164281  |
| H113 | 1.152829  | 2.229177  | -4.542319 | H173 | 3.574121  | -1.044200 | 1.113436  |
| H114 | -4.393576 | 5.123040  | -4.057302 | H174 | 2.122206  | 0.729206  | 1.907890  |
| H115 | -4.847641 | 5.788672  | -1.677635 | H175 | 2.703384  | -1.162750 | -0.413335 |
| H116 | -6.348222 | 5.596200  | -2.595865 | H176 | 2.035536  | -2.601149 | 2.142947  |
| H117 | -5.837990 | 4.329308  | -1.473612 | H177 | 1.499866  | -2.957564 | 0.517674  |
| H118 | -3.014371 | 3.085863  | -3.701041 | H178 | -0.579628 | -1.974536 | 1.725331  |
| H119 | -3.760858 | 2.828587  | -2.137781 | H179 | 1.459779  | 3.472346  | -5.745781 |
| H120 | -5.949599 | 2.561754  | -3.402003 | H180 | 7.453528  | 0.690477  | -4.009298 |
| H121 | -2.015102 | 0.427785  | -3.131619 | H181 | 9.041932  | -1.426252 | -5.577934 |
| H122 | -2.001997 | -1.289336 | -2.813485 | H182 | 10.046256 | 4.114678  | -1.464025 |
| H123 | -4.407554 | 0.235890  | -4.000478 | H183 | 8.854355  | 2.975713  | -2.134717 |
| H124 | -2.339776 | -1.571887 | -7.065309 | H184 | 10.020531 | 0.923729  | 1.581932  |
| H125 | 1.743296  | -3.340476 | -5.956549 | H185 | 3.499140  | 0.344837  | 10.051196 |
| H126 | 3.329949  | -2.593697 | -5.989371 | H186 | 2.345505  | -6.357948 | 6.982138  |
| H127 | 2.577550  | -3.092485 | -3.724902 | H187 | 1.958598  | -4.669824 | 7.350568  |
| H128 | 3.207051  | -0.941240 | -2.677897 | H188 | -2.168795 | -4.881036 | 7.105415  |
| H129 | 2.914119  | -0.078761 | -4.180780 | H189 | -3.672666 | -3.985001 | 6.784296  |
| H130 | 4.224479  | -1.273285 | -4.083231 | H190 | -7.082465 | -5.100790 | 1.376781  |
| H131 | 0.793355  | -1.807978 | -2.588916 | H191 | -7.014109 | -7.516398 | -2.862289 |



|      |           |           |           |
|------|-----------|-----------|-----------|
| H192 | -3.436627 | -5.244883 | -5.325086 |
| H193 | 2.303646  | -1.286082 | -7.565746 |
| H194 | -1.839831 | -0.550040 | -8.421546 |
| H195 | -4.322784 | -1.515212 | -3.764785 |
| H196 | -3.059282 | -0.192339 | 1.189097  |
| H197 | -5.002730 | 0.404357  | 0.281203  |
| H198 | 0.046164  | 8.907149  | -4.023998 |
| H199 | 1.386674  | 7.819914  | -3.578304 |
| H200 | -5.064263 | 10.754890 | -0.145419 |
| H201 | -4.177864 | 9.472807  | -1.005250 |
| H202 | -6.352492 | 6.805939  | 1.816040  |
| H203 | 7.012434  | 0.114292  | -5.627443 |
| H204 | -1.310248 | 6.933201  | -0.135682 |
| H205 | -2.604656 | 0.188018  | -6.997835 |
| H206 | -6.557477 | 3.879091  | -4.422296 |
| H207 | -5.153784 | 2.929469  | -4.936649 |
| H208 | -3.256528 | -0.733611 | -4.942231 |
| H209 | 2.822791  | 2.708486  | -4.911999 |
| H210 | 4.618931  | -2.710927 | 5.551426  |
| H211 | 3.535207  | -1.701338 | 4.657376  |
| H212 | 9.621542  | 2.981678  | 0.728566  |
| H213 | 0.025219  | -2.146628 | -7.513141 |
| H214 | -1.234348 | 7.831612  | -2.174854 |
| H215 | -6.350802 | 8.888952  | 0.932082  |
| H216 | -4.803080 | -0.711983 | 4.185609  |
| H217 | -6.335280 | -0.186453 | 3.544630  |
| H218 | -5.796273 | -4.808865 | -0.973145 |
| H219 | -4.809606 | -7.644814 | -3.566340 |
| H220 | -1.057635 | -0.607159 | -0.415022 |
| H221 | -0.428638 | -1.298671 | 3.967089  |
| H222 | 0.976295  | -2.074494 | 3.909885  |
| C223 | 8.219768  | -0.055226 | 3.290269  |
| H224 | 8.454788  | -1.116110 | 3.124387  |
| H225 | 9.135010  | 0.397998  | 3.694360  |
| H226 | 6.832196  | -1.113441 | 1.117767  |
| S227 | 2.366374  | 3.555620  | -2.093329 |
| H228 | 2.308842  | 4.751319  | -1.466224 |
| H229 | 0.714582  | 4.522509  | -3.588346 |
| S230 | -5.377983 | 4.383863  | 3.138627  |
| H231 | -4.682133 | 3.256604  | 2.890659  |
| C232 | 7.672702  | -2.126525 | -4.083454 |
| C233 | 7.325359  | -2.114804 | -2.723687 |
| H234 | 7.729942  | -1.336957 | -2.080420 |
| C235 | 7.138614  | -3.131733 | -4.900342 |
| H236 | 7.403229  | -3.157061 | -5.955224 |
| C237 | 6.469043  | -3.084807 | -2.201758 |
| H238 | 6.211615  | -3.062370 | -1.145896 |
| C239 | 5.944254  | -4.083675 | -3.025388 |
| H240 | 5.282451  | -4.841577 | -2.615304 |
| C241 | 6.281668  | -4.103679 | -4.379361 |
| H242 | 5.885081  | -4.879524 | -5.028966 |
| C243 | -2.386034 | 4.505714  | -2.211137 |
| H244 | -2.739847 | 4.990147  | -1.295433 |
| H245 | -1.493985 | 3.923921  | -1.955611 |
| H246 | -2.073589 | 5.299315  | -2.901743 |
| H247 | 5.772733  | 0.113149  | 1.836247  |
| C248 | 7.107092  | 0.065630  | 4.336216  |
| H249 | 6.199838  | -0.464062 | 4.030210  |
| H250 | 7.427084  | -0.350079 | 5.297418  |
| H251 | 6.836075  | 1.114661  | 4.503045  |

## 4.5 Mutant S1

The following atoms were kept fixed in the geometry optimizations of reactant and transition state structures: 1, 9, 10, 18, 19, 26, 31, 39, 40, 45, 50, 54, 59, 64, 68, 78, 82, 86.

### Reactant:

|     |           |           |           |      |           |           |           |
|-----|-----------|-----------|-----------|------|-----------|-----------|-----------|
| C1  | -6.475280 | 5.491149  | 1.257834  | C51  | -5.708992 | 3.259122  | -3.463036 |
| C2  | -6.077078 | 6.512917  | 0.203644  | C52  | -6.570635 | 2.498863  | -2.444770 |
| O3  | -4.967522 | 6.475093  | -0.328592 | C53  | -4.369962 | 3.680297  | -2.840882 |
| C4  | -7.962600 | 5.283908  | 1.561942  | C54  | -6.751680 | -0.802384 | 0.274853  |
| C5  | -8.238389 | 4.280310  | 2.692211  | N55  | -5.314834 | -0.714871 | 0.493217  |
| S6  | -7.680069 | 2.548018  | 2.403676  | C56  | -4.675234 | -1.042256 | 1.632931  |
| C7  | -6.083249 | 2.503789  | 3.297574  | N57  | -5.344881 | -1.451052 | 2.728230  |
| N8  | -6.992701 | 7.476932  | -0.081962 | N58  | -3.352613 | -0.906789 | 1.709458  |
| C9  | -6.709124 | 8.555684  | -1.001215 | C59  | -2.814910 | -1.112258 | -4.525347 |
| C10 | -1.461626 | 6.897523  | 0.120984  | C60  | -2.114727 | -1.616972 | -3.263041 |
| C11 | -0.628327 | 7.133556  | -1.131581 | C61  | -2.667466 | -0.998058 | -1.995593 |
| O12 | 0.574240  | 6.882673  | -1.184298 | O62  | -3.745622 | -0.425132 | -1.937476 |
| C13 | -1.168774 | 5.537514  | 0.769547  | O63  | -1.939830 | -1.128224 | -0.879442 |
| C14 | -2.022514 | 5.238134  | 2.016354  | C64  | -0.687683 | -0.532102 | -7.642732 |
| C15 | -1.820339 | 3.783334  | 2.465138  | C65  | 0.472601  | -0.268454 | -6.704022 |
| C16 | -1.731557 | 6.202708  | 3.176369  | O66  | 0.359315  | 0.413988  | -5.688344 |
| N17 | -1.316007 | 7.687543  | -2.175826 | N67  | 1.649037  | -0.828799 | -7.106252 |
| C18 | -0.687866 | 8.017217  | -3.440237 | C68  | 2.939475  | -0.513808 | -6.515680 |
| C19 | 2.373250  | 0.448463  | 9.208279  | C69  | 3.686483  | -1.730269 | -5.924714 |
| C20 | 1.342705  | -0.172453 | 8.498069  | C70  | 3.480560  | -1.995297 | -4.416537 |
| C21 | 3.407053  | 1.066872  | 8.500141  | C71  | 4.160963  | -0.921948 | -3.552932 |
| C22 | 1.342664  | -0.192889 | 7.102622  | C72  | 2.001713  | -2.153265 | -4.037105 |
| C23 | 3.418634  | 1.057943  | 7.106581  | C73  | -0.775547 | -6.507158 | -4.454675 |
| C24 | 2.387291  | 0.423957  | 6.398654  | C74  | -2.207953 | -6.409885 | -3.933957 |
| O25 | 2.473732  | 0.400103  | 5.038998  | O75  | -2.728167 | -5.334526 | -3.622416 |
| C26 | 2.666162  | -5.210313 | 6.444601  | C76  | 0.148351  | -5.448323 | -3.863066 |
| C27 | 3.794820  | -4.528980 | 5.661963  | N77  | -2.895298 | -7.579476 | -3.918223 |
| C28 | 3.289061  | -3.260364 | 4.992768  | C78  | -4.323868 | -7.658019 | -3.632084 |
| N29 | 4.024147  | -2.139283 | 5.151541  | C79  | -4.686612 | -7.737773 | -2.140670 |
| O30 | 2.246877  | -3.285895 | 4.323235  | O80  | -5.293258 | -8.704324 | -1.688709 |
| C31 | 8.907702  | 2.317438  | 2.033978  | N81  | -4.316557 | -6.665155 | -1.400461 |
| C32 | 9.011650  | 3.174721  | 0.792193  | C82  | -4.680227 | -6.599527 | 0.009436  |
| O33 | 9.512098  | 2.777916  | -0.260887 | C83  | -4.149863 | -5.363868 | 0.737346  |
| C34 | 7.479105  | 2.141539  | 2.593245  | C84  | -2.617348 | -5.345666 | 0.805960  |
| C35 | 6.464497  | 1.483547  | 1.636028  | C85  | -4.767811 | -5.322718 | 2.142447  |
| C36 | 6.820129  | 0.021082  | 1.329525  | C86  | -2.231431 | -5.083455 | 5.724571  |
| C37 | 5.043350  | 1.591542  | 2.209111  | C87  | -1.688907 | -3.671017 | 5.457257  |
| N38 | 8.529683  | 4.435745  | 0.949291  | C88  | -2.508919 | -2.835842 | 4.457678  |
| C39 | 8.516462  | 5.390913  | -0.127051 | O89  | -3.758962 | -2.971837 | 4.444003  |
| C40 | 8.365059  | 2.130126  | -4.047686 | O90  | -1.860564 | -2.021576 | 3.712469  |
| C41 | 9.273718  | 0.950643  | -3.681816 | O91  | 0.712305  | -1.062391 | 3.770508  |
| C42 | 8.782339  | 0.235018  | -2.421507 | H92  | -8.428619 | 6.229318  | 1.879313  |
| S43 | 9.854408  | -1.131960 | -1.819100 | H93  | -8.486049 | 4.959313  | 0.654970  |
| C44 | 11.303315 | -0.174904 | -1.234639 | H94  | -7.789767 | 4.619595  | 3.632067  |
| C45 | 1.888809  | 3.656977  | -4.538194 | H95  | -9.317482 | 4.215041  | 2.858870  |
| C46 | 1.293304  | 3.727966  | -3.125161 | H96  | -6.212761 | 2.843472  | 4.328232  |
| C47 | 2.143859  | 2.903632  | -2.138707 | H97  | -5.766995 | 1.458226  | 3.314512  |
| C48 | -0.176007 | 3.280128  | -3.150453 | H98  | -5.314329 | 3.098674  | 2.801179  |
| C49 | 1.752130  | 3.067759  | -0.666021 | H99  | -6.029599 | 4.545044  | 0.938391  |
| C50 | -5.494150 | 2.417791  | -4.728873 | H100 | -7.544115 | 8.704317  | -1.692947 |
|     |           |           |           | H101 | -1.352027 | 4.751916  | 0.025578  |

|      |           |           |           |      |           |           |           |
|------|-----------|-----------|-----------|------|-----------|-----------|-----------|
| H102 | -0.102709 | 5.481363  | 1.018784  | H162 | 2.753188  | 0.248245  | -5.756891 |
| H103 | -3.075901 | 5.362196  | 1.724033  | H163 | -0.351420 | -4.480435 | -3.895078 |
| H104 | -2.440369 | 3.542733  | 3.336249  | H164 | 1.071021  | -5.387943 | -4.443782 |
| H105 | -2.076540 | 3.078599  | 1.666708  | H165 | -0.372923 | -7.514773 | -4.298223 |
| H106 | -0.776295 | 3.599953  | 2.745782  | H166 | -4.798180 | -6.775915 | -4.074340 |
| H107 | -2.344789 | 5.960449  | 4.051751  | H167 | -4.483513 | -4.469896 | 0.186995  |
| H108 | -1.936810 | 7.244807  | 2.911191  | H168 | -5.861525 | -5.265671 | 2.092772  |
| H109 | -0.680315 | 6.137408  | 3.482824  | H169 | -4.404486 | -4.474442 | 2.727353  |
| H110 | -1.207057 | 7.707554  | 0.816766  | H170 | -4.514104 | -6.233131 | 2.699454  |
| H111 | -1.033095 | 7.363363  | -4.250304 | H171 | -2.153866 | -5.352767 | -0.186100 |
| H112 | 0.528556  | -0.653943 | 9.033265  | H172 | -2.247973 | -6.224045 | 1.348863  |
| H113 | 4.212128  | 1.562580  | 9.036265  | H173 | -4.312171 | -7.505482 | 0.507752  |
| H114 | 0.551745  | -0.688706 | 6.548498  | H174 | -1.682506 | -3.102050 | 6.398130  |
| H115 | 4.214054  | 1.540448  | 6.546511  | H175 | -0.650806 | -3.703260 | 5.111827  |
| H116 | 1.667634  | -0.027996 | 4.619993  | H176 | -2.177844 | -5.703712 | 4.823745  |
| H117 | 4.149761  | -5.195540 | 4.866555  | H177 | 8.720215  | 2.641903  | -4.948410 |
| H118 | 4.652980  | -4.317294 | 6.309247  | H178 | 10.291351 | 1.322215  | -3.515631 |
| H119 | 1.816866  | -5.401111 | 5.785938  | H179 | 10.969745 | 0.697877  | -0.668074 |
| H120 | 7.082724  | 3.116388  | 2.910554  | H180 | 11.882747 | -0.835733 | -0.585832 |
| H121 | 7.543375  | 1.542824  | 3.511835  | H181 | -7.127409 | -1.825824 | 0.405106  |
| H122 | 6.484555  | 2.042379  | 0.688912  | H182 | -7.306264 | -0.128661 | 0.937297  |
| H123 | 6.084685  | -0.420630 | 0.648816  | H183 | -6.949225 | -0.499411 | -0.753339 |
| H124 | 6.820366  | -0.579174 | 2.248076  | H184 | -2.827511 | -1.281920 | 2.535436  |
| H125 | 7.800569  | -0.084941 | 0.855934  | C185 | 0.262044  | -2.841753 | 0.944705  |
| H126 | 4.755130  | 2.634626  | 2.379475  | C186 | 1.035113  | -1.685802 | 0.498739  |
| H127 | 4.309328  | 1.154533  | 1.524030  | O187 | 0.279658  | -2.479862 | -0.490205 |
| H128 | 4.949978  | 1.064565  | 3.166263  | C188 | 2.507703  | -2.020380 | 0.543532  |
| H129 | 9.343942  | 1.347869  | 1.785195  | C189 | 1.201977  | -3.981880 | 1.266393  |
| H130 | 7.497721  | 5.604005  | -0.473128 | C190 | 2.545739  | -3.567483 | 0.612357  |
| H131 | 1.322387  | 4.772985  | -2.785551 | H191 | 0.679562  | -0.666569 | 0.614472  |
| H132 | -0.644904 | 3.348195  | -2.163793 | H192 | 3.070060  | -1.609306 | -0.300862 |
| H133 | -0.761459 | 3.907437  | -3.832366 | H193 | 3.405680  | -3.930731 | 1.180307  |
| H134 | -0.261722 | 2.245759  | -3.504426 | H194 | 2.904771  | -1.572749 | 1.462315  |
| H135 | 2.096273  | 1.841443  | -2.422486 | H195 | 2.620250  | -3.985111 | -0.394749 |
| H136 | 3.194537  | 3.202476  | -2.257446 | H196 | 1.302237  | -4.038512 | 2.354351  |
| H137 | 1.737698  | 4.126559  | -0.385799 | H197 | 0.831731  | -4.949536 | 0.912812  |
| H138 | 0.757344  | 2.659978  | -0.458565 | H198 | -0.701137 | -2.740647 | 1.434838  |
| H139 | 2.460147  | 2.552044  | -0.007597 | H199 | 1.348651  | 4.315143  | -5.228780 |
| H140 | 1.817113  | 2.638746  | -4.938574 | H200 | 8.337243  | 2.860395  | -3.232232 |
| H141 | -6.251859 | 4.171850  | -3.751637 | H201 | 9.332423  | 0.236379  | -4.511909 |
| H142 | -6.754727 | 3.097608  | -1.545990 | H202 | 8.983218  | 6.334545  | 0.176327  |
| H143 | -7.542410 | 2.219741  | -2.868649 | H203 | 9.085246  | 4.964672  | -0.953314 |
| H144 | -6.061687 | 1.578915  | -2.132319 | H204 | 9.542409  | 2.760773  | 2.812639  |
| H145 | -4.515696 | 4.346903  | -1.984074 | H205 | 2.366162  | 0.457336  | 10.293678 |
| H146 | -3.742125 | 4.205819  | -3.569278 | H206 | 3.005700  | -6.160969 | 6.865485  |
| H147 | -3.812410 | 2.800114  | -2.498486 | H207 | 2.321075  | -4.577961 | 7.268465  |
| H148 | -4.957043 | 1.492621  | -4.488063 | H208 | -1.655569 | -5.580799 | 6.511704  |
| H149 | -1.035824 | -1.431144 | -3.310160 | H209 | -3.279214 | -5.034065 | 6.030454  |
| H150 | -2.242331 | -2.705170 | -3.163059 | H210 | -5.774827 | -6.637251 | 0.091443  |
| H151 | -2.546071 | -0.072938 | -4.729374 | H211 | -4.727488 | -8.554639 | -4.103173 |
| H152 | -0.647211 | -1.529504 | -8.091881 | H212 | -0.825774 | -6.359906 | -5.542757 |
| H153 | 3.398689  | -2.623983 | -6.494828 | H213 | 3.564115  | -0.048258 | -7.288797 |
| H154 | 4.760526  | -1.592278 | -6.101786 | H214 | -0.670693 | 0.203629  | -8.454919 |
| H155 | 3.985847  | -2.948749 | -4.205659 | H215 | -3.899438 | -1.176800 | -4.415492 |
| H156 | 4.088443  | -1.176452 | -2.490280 | H216 | -2.834999 | -0.741017 | 0.853578  |
| H157 | 3.695848  | 0.061855  | -3.681385 | H217 | -4.732190 | -0.459149 | -0.306746 |
| H158 | 5.224647  | -0.826072 | -3.798850 | H218 | -0.888352 | 9.057422  | -3.720480 |
| H159 | 1.896229  | -2.437228 | -2.984554 | H219 | 0.386326  | 7.879206  | -3.313107 |
| H160 | 1.451683  | -1.219113 | -4.189911 | H220 | -6.516129 | 9.499985  | -0.477296 |
| H161 | 1.519509  | -2.926774 | -4.644532 | H221 | -5.818486 | 8.283082  | -1.566988 |

|      |           |           |           |     |           |           |           |
|------|-----------|-----------|-----------|-----|-----------|-----------|-----------|
| H222 | -5.943974 | 5.780125  | 2.175765  | N29 | 3.990887  | -2.443269 | 5.004294  |
| H223 | 7.336580  | 1.800297  | -4.236207 | O30 | 2.166963  | -3.500662 | 4.159562  |
| H224 | 11.937508 | 0.145589  | -2.064640 | C31 | 8.977748  | 2.049153  | 2.041465  |
| H225 | 8.665859  | 0.951753  | -1.603722 | C32 | 9.082981  | 2.939838  | 0.824015  |
| H226 | 7.808219  | -0.234005 | -2.601843 | O33 | 9.594843  | 2.570019  | -0.233231 |
| H227 | -2.533067 | 6.981827  | -0.092593 | C34 | 7.578283  | 1.932845  | 2.679196  |
| H228 | -1.625908 | -0.414797 | -7.102799 | C35 | 6.468122  | 1.382101  | 1.761713  |
| H229 | -6.447304 | 2.140296  | -5.193821 | C36 | 6.741051  | -0.064097 | 1.322216  |
| H230 | -4.903319 | 2.962226  | -5.473904 | C37 | 5.103956  | 1.491920  | 2.458589  |
| H231 | -2.517455 | -1.720384 | -5.383175 | N38 | 8.602307  | 4.196347  | 1.010011  |
| H232 | 2.942398  | 3.959948  | -4.546084 | C39 | 8.641137  | 5.190756  | -0.028894 |
| H233 | 4.768566  | -2.119562 | 5.830585  | C40 | 8.409656  | 2.047767  | -4.040759 |
| H234 | 3.621053  | -1.242763 | 4.876536  | C41 | 9.261619  | 0.819861  | -3.698531 |
| H235 | 8.094058  | 4.680694  | 1.824801  | C42 | 8.743292  | 0.110882  | -2.445071 |
| H236 | 1.650220  | -1.338969 | -7.977311 | S43 | 9.755445  | -1.308786 | -1.861543 |
| H237 | -2.317341 | 7.772644  | -2.087988 | C44 | 11.250902 | -0.425161 | -1.279663 |
| H238 | -7.873500 | 7.476316  | 0.406410  | C45 | 1.963962  | 3.718295  | -4.460337 |
| H239 | -4.785184 | -1.966674 | 3.448422  | C46 | 1.406561  | 3.809097  | -3.032695 |
| H240 | -6.312119 | -1.713382 | 2.621721  | C47 | 2.307252  | 3.035629  | -2.049314 |
| H241 | -3.858006 | -5.887971 | -1.863950 | C48 | -0.049819 | 3.321422  | -3.005284 |
| H242 | -2.393493 | -8.441571 | -4.068067 | C49 | 1.960207  | 3.240810  | -0.570262 |
| H243 | -1.100280 | -1.673045 | -0.940730 | C50 | -5.443227 | 2.634142  | -4.655760 |
| H244 | -0.235415 | -1.326609 | 3.852382  | C51 | -5.609103 | 3.350672  | -3.308065 |
| H245 | 1.219468  | -1.890656 | 3.897769  | C52 | -6.489575 | 2.523245  | -2.360690 |
| S246 | 0.570253  | -5.828101 | -2.104981 | C53 | -4.247688 | 3.649506  | -2.663837 |
| H247 | 0.509357  | -4.563302 | -1.641783 | C54 | -6.747834 | -0.702585 | 0.258753  |
| H248 | -2.272458 | -4.455944 | 1.340253  | N55 | -5.305104 | -0.706403 | 0.422645  |

### TS attack at C1:

|     |           |           |           |     |           |           |           |
|-----|-----------|-----------|-----------|-----|-----------|-----------|-----------|
| C1  | -6.340443 | 5.553233  | 1.420646  | C61 | -2.737401 | -0.959966 | -1.987511 |
| C2  | -5.918159 | 6.606645  | 0.408899  | O62 | -3.866064 | -0.438808 | -1.963887 |
| O3  | -4.802543 | 6.569365  | -0.110375 | O63 | -2.026573 | -1.130931 | -0.913332 |
| C4  | -7.806615 | 5.483770  | 1.858554  | C64 | -0.707983 | -0.327011 | -7.672981 |
| C5  | -8.081838 | 4.462909  | 2.973354  | C65 | 0.481932  | -0.021615 | -6.787980 |
| S6  | -7.738933 | 2.697242  | 2.574995  | O66 | 0.427967  | 0.795895  | -5.873818 |
| C7  | -6.077279 | 2.454526  | 3.305005  | N67 | 1.614502  | -0.707068 | -7.117943 |
| N8  | -6.820003 | 7.588964  | 0.142719  | C68 | 2.922810  | -0.414232 | -6.560966 |
| C9  | -6.520225 | 8.685548  | -0.748603 | C69 | 3.589176  | -1.608197 | -5.841107 |
| C10 | -1.303420 | 6.890391  | 0.303748  | C70 | 3.343451  | -1.718883 | -4.318955 |
| C11 | -0.463688 | 7.169663  | -0.935303 | C71 | 4.090135  | -0.622295 | -3.543727 |
| O12 | 0.743406  | 6.938594  | -0.982977 | C72 | 1.853290  | -1.734111 | -3.950566 |
| C13 | -1.053074 | 5.486341  | 0.872679  | C73 | -0.963890 | -6.247427 | -4.710389 |
| C14 | -1.919400 | 5.138109  | 2.097713  | C74 | -2.391917 | -6.194598 | -4.171267 |
| C15 | -1.743087 | 3.658879  | 2.471863  | O75 | -2.934096 | -5.139820 | -3.834971 |
| C16 | -1.620282 | 6.036840  | 3.307348  | C76 | -0.080231 | -5.128173 | -4.169670 |
| N17 | -1.151171 | 7.736290  | -1.972310 | N77 | -3.052426 | -7.381351 | -4.164238 |
| C18 | -0.519883 | 8.096201  | -3.227089 | C78 | -4.473441 | -7.490578 | -3.853234 |
| C19 | 2.432486  | 0.106726  | 9.186340  | C79 | -4.812308 | -7.630294 | -2.360740 |
| C20 | 1.336083  | -0.439787 | 8.513364  | O80 | -5.441417 | -8.599884 | -1.947624 |
| C21 | 3.479631  | 0.650062  | 8.436634  | N81 | -4.393044 | -6.603061 | -1.579655 |
| C22 | 1.283344  | -0.462458 | 7.116664  | C82 | -4.795242 | -6.530265 | -0.181408 |
| C23 | 3.439540  | 0.637854  | 7.043090  | C83 | -3.927235 | -5.601387 | 0.672529  |
| C24 | 2.342564  | 0.075786  | 6.376554  | C84 | -2.479022 | -6.097656 | 0.772090  |
| O25 | 2.393402  | 0.049230  | 5.006395  | C85 | -4.574820 | -5.464160 | 2.057546  |
| C26 | 2.600775  | -5.474996 | 6.260333  | C86 | -2.295787 | -5.228813 | 5.564616  |
| C27 | 3.705749  | -4.846796 | 5.401539  | C87 | -1.669284 | -3.849376 | 5.313793  |
| C28 | 3.226792  | -3.535754 | 4.804609  | C88 | -2.480057 | -2.931313 | 4.381394  |

|      |           |           |           |      |           |           |           |
|------|-----------|-----------|-----------|------|-----------|-----------|-----------|
| O89  | -3.726364 | -3.033860 | 4.366151  | H149 | -1.081941 | -1.288505 | -3.311140 |
| O90  | -1.820977 | -2.079285 | 3.679983  | H150 | -2.272680 | -2.583187 | -3.254863 |
| O91  | 0.643429  | -1.402488 | 3.384422  | H151 | -2.590220 | 0.100216  | -4.725318 |
| H92  | -8.134718 | 6.457825  | 2.252530  | H152 | -0.681243 | -1.337220 | -8.093221 |
| H93  | -8.443474 | 5.254294  | 0.995747  | H153 | 3.260271  | -2.535127 | -6.330682 |
| H94  | -7.517486 | 4.714624  | 3.877793  | H154 | 4.672247  | -1.548098 | -6.007904 |
| H95  | -9.142383 | 4.499448  | 3.238924  | H155 | 3.774640  | -2.682892 | -4.012641 |
| H96  | -6.075998 | 2.747117  | 4.358115  | H156 | 3.963899  | -0.756368 | -2.463741 |
| H97  | -5.861944 | 1.385160  | 3.242742  | H157 | 3.715368  | 0.377513  | -3.789164 |
| H98  | -5.303571 | 3.002115  | 2.763761  | H158 | 5.164946  | -0.641304 | -3.758064 |
| H99  | -6.035867 | 4.591254  | 0.997104  | H159 | 1.719961  | -1.917306 | -2.879144 |
| H100 | -7.305135 | 8.803803  | -1.502795 | H160 | 1.372708  | -0.780493 | -4.191026 |
| H101 | -1.256422 | 4.751459  | 0.083571  | H161 | 1.320219  | -2.520736 | -4.495057 |
| H102 | 0.010030  | 5.385185  | 1.120958  | H162 | 2.788307  | 0.433745  | -5.887144 |
| H103 | -2.968573 | 5.293146  | 1.806582  | H163 | -0.623628 | -4.184984 | -4.222611 |
| H104 | -2.375075 | 3.383158  | 3.323836  | H164 | 0.830129  | -5.047888 | -4.767332 |
| H105 | -2.002531 | 3.000536  | 1.635876  | H165 | -0.515418 | -7.230600 | -4.525091 |
| H106 | -0.703805 | 3.447422  | 2.752227  | H166 | -4.966821 | -6.598308 | -4.251978 |
| H107 | -2.240241 | 5.757626  | 4.166920  | H167 | -3.920903 | -4.606815 | 0.199680  |
| H108 | -1.810847 | 7.093547  | 3.094999  | H168 | -5.612448 | -5.119811 | 1.976247  |
| H109 | -0.570936 | 5.942368  | 3.613403  | H169 | -4.044796 | -4.752390 | 2.693848  |
| H110 | -1.020234 | 7.650574  | 1.043165  | H170 | -4.591376 | -6.432170 | 2.573518  |
| H111 | -0.848719 | 7.449554  | -4.049497 | H171 | -2.005397 | -6.176829 | -0.211180 |
| H112 | 0.508052  | -0.860359 | 9.077073  | H172 | -2.443967 | -7.087981 | 1.242561  |
| H113 | 4.336624  | 1.090481  | 8.938795  | H173 | -4.769797 | -7.548973 | 0.218853  |
| H114 | 0.431309  | -0.897893 | 6.601507  | H174 | -1.576329 | -3.312171 | 6.268941  |
| H115 | 4.245199  | 1.066234  | 6.454541  | H175 | -0.652305 | -3.941959 | 4.917761  |
| H116 | 1.577619  | -0.318781 | 4.591664  | H176 | -2.325370 | -5.822117 | 4.645277  |
| H117 | 3.951589  | -5.513922 | 4.567160  | H177 | 8.784070  | 2.554437  | -4.936463 |
| H118 | 4.623432  | -4.703346 | 5.982163  | H178 | 10.297405 | 1.138584  | -3.534601 |
| H119 | 1.696303  | -5.614936 | 5.665238  | H179 | 10.963467 | 0.443400  | -0.682377 |
| H120 | 7.260764  | 2.910269  | 3.069808  | H180 | 11.816000 | -1.126991 | -0.661921 |
| H121 | 7.662437  | 1.285032  | 3.562462  | H181 | -7.192968 | -1.688118 | 0.453625  |
| H122 | 6.433520  | 2.010435  | 0.859947  | H182 | -7.235200 | 0.039622  | 0.902298  |
| H123 | 5.929515  | -0.433811 | 0.686675  | H183 | -6.961789 | -0.439404 | -0.777236 |
| H124 | 6.807754  | -0.729434 | 2.192624  | H184 | -2.812261 | -1.326613 | 2.408716  |
| H125 | 7.668866  | -0.163939 | 0.751831  | C185 | 0.061117  | -2.759145 | 0.852078  |
| H126 | 4.869396  | 2.526849  | 2.730208  | C186 | 0.698653  | -1.474971 | 1.179223  |
| H127 | 4.298986  | 1.131077  | 1.810005  | O187 | 0.092285  | -2.237929 | -0.490932 |
| H128 | 5.078195  | 0.894914  | 3.378717  | C188 | 2.185403  | -1.577782 | 1.009805  |
| H129 | 9.342828  | 1.065059  | 1.740446  | C189 | 1.134323  | -3.821055 | 1.035623  |
| H130 | 7.635811  | 5.460984  | -0.373430 | C190 | 2.456483  | -3.080190 | 0.710654  |
| H131 | 1.417859  | 4.862748  | -2.719086 | H191 | 0.144219  | -0.547340 | 1.207378  |
| H132 | -0.490179 | 3.388901  | -2.005611 | H192 | 2.522789  | -0.913408 | 0.208498  |
| H133 | -0.672776 | 3.922036  | -3.677531 | H193 | 3.289359  | -3.465327 | 1.302469  |
| H134 | -0.119478 | 2.281161  | -3.343827 | H194 | 2.661916  | -1.228686 | 1.929216  |
| H135 | 2.274284  | 1.964082  | -2.296166 | H195 | 2.710093  | -3.205014 | -0.343810 |
| H136 | 3.346660  | 3.352647  | -2.212546 | H196 | 1.125198  | -4.157971 | 2.075973  |
| H137 | 1.931682  | 4.307738  | -0.324322 | H197 | 0.963108  | -4.689440 | 0.394941  |
| H138 | 0.981376  | 2.819855  | -0.318342 | H198 | -0.938596 | -2.969355 | 1.231839  |
| H139 | 2.700581  | 2.760681  | 0.080619  | H199 | 1.383679  | 4.341681  | -5.150424 |
| H140 | 1.910905  | 2.691100  | -4.837374 | H200 | 8.422900  | 2.766736  | -3.214932 |
| H141 | -6.115159 | 4.310029  | -3.495305 | H201 | 9.279677  | 0.115756  | -4.539021 |
| H142 | -6.628449 | 3.025997  | -1.396753 | H202 | 9.145785  | 6.101387  | 0.312879  |
| H143 | -7.481775 | 2.340698  | -2.790216 | H203 | 9.198132  | 4.771239  | -0.866428 |
| H144 | -6.018746 | 1.552103  | -2.167787 | H204 | 9.681318  | 2.426004  | 2.796272  |
| H145 | -4.358476 | 4.259350  | -1.760362 | H205 | 2.464472  | 0.117108  | 10.270860 |
| H146 | -3.593500 | 4.195498  | -3.353087 | H206 | 2.919269  | -6.447114 | 6.646693  |
| H147 | -3.740276 | 2.716546  | -2.391361 | H207 | 2.352185  | -4.835913 | 7.113224  |
| H148 | -4.953554 | 1.663082  | -4.517917 | H208 | -1.722412 | -5.788603 | 6.310652  |

|      |           |           |           |     |           |           |           |
|------|-----------|-----------|-----------|-----|-----------|-----------|-----------|
| H209 | -3.323303 | -5.117670 | 5.918339  | C16 | -1.597942 | 5.994576  | 3.315356  |
| H210 | -5.844103 | -6.203707 | -0.118797 | N17 | -1.129127 | 7.720968  | -1.957193 |
| H211 | -4.876761 | -8.373464 | -4.350306 | C18 | -0.495928 | 8.082828  | -3.210406 |
| H212 | -1.034644 | -6.141055 | -5.802306 | C19 | 2.419594  | 0.041185  | 9.178021  |
| H213 | 3.576768  | -0.074884 | -7.375057 | C20 | 1.339092  | -0.523641 | 8.494255  |
| H214 | -0.728612 | 0.386370  | -8.504666 | C21 | 3.448002  | 0.632193  | 8.438314  |
| H215 | -3.920792 | -1.043346 | -4.481254 | C22 | 1.284690  | -0.519091 | 7.096962  |
| H216 | -2.831763 | -0.896687 | 0.681544  | C23 | 3.405761  | 0.647921  | 7.044698  |
| H217 | -4.728262 | -0.506178 | -0.414834 | C24 | 2.325846  | 0.066055  | 6.367940  |
| H218 | -0.736424 | 9.137224  | -3.491852 | O25 | 2.380801  | 0.066722  | 4.995693  |
| H219 | 0.555600  | 7.974249  | -3.094833 | C26 | 2.573408  | -5.530843 | 6.232805  |
| H220 | -6.411068 | 9.632300  | -0.205818 | C27 | 3.735508  | -4.725616 | 5.651299  |
| H221 | -5.578349 | 8.456126  | -1.246326 | C28 | 3.236377  | -3.436615 | 5.023372  |
| H222 | -5.696807 | 5.710403  | 2.297018  | N29 | 4.065281  | -2.374492 | 5.023571  |
| H223 | 7.365144  | 1.771778  | -4.227088 | O30 | 2.109073  | -3.398561 | 4.505579  |
| H224 | 11.881402 | -0.105978 | -2.113016 | C31 | 8.977782  | 1.988066  | 2.046222  |
| H225 | 8.660967  | 0.822916  | -1.619132 | C32 | 9.089825  | 2.883032  | 0.832255  |
| H226 | 7.749000  | -0.312756 | -2.627336 | O33 | 9.576037  | 2.506969  | -0.234719 |
| H227 | -2.371609 | 7.021227  | 0.098667  | C34 | 7.572564  | 1.889604  | 2.675931  |
| H228 | -1.624877 | -0.197436 | -7.099558 | C35 | 6.459482  | 1.372356  | 1.742476  |
| H229 | -6.412675 | 2.454056  | -5.135148 | C36 | 6.690571  | -0.084543 | 1.314619  |
| H230 | -4.831014 | 3.223060  | -5.347987 | C37 | 5.085593  | 1.534404  | 2.409258  |
| H231 | -2.506606 | -1.521797 | -5.439664 | N38 | 8.639720  | 4.149006  | 1.031495  |
| H232 | 3.006770  | 4.054792  | -4.505569 | C39 | 8.652925  | 5.137866  | -0.013533 |
| H233 | 4.769860  | -2.481047 | 5.642422  | C40 | 8.415591  | 2.009555  | -4.036513 |
| H234 | 3.603184  | -1.526175 | 4.784216  | C41 | 9.260992  | 0.775893  | -3.698768 |
| H235 | 8.177471  | 4.427998  | 1.894130  | C42 | 8.734768  | 0.061129  | -2.451845 |
| H236 | 1.573757  | -1.330364 | -7.910507 | S43 | 9.741032  | -1.364186 | -1.871620 |
| H237 | -2.154713 | 7.801060  | -1.891851 | C44 | 11.237691 | -0.487569 | -1.282061 |
| H238 | -7.714810 | 7.571235  | 0.604313  | C45 | 1.975519  | 3.701536  | -4.456472 |
| H239 | -4.784555 | -1.921984 | 3.379939  | C46 | 1.422036  | 3.790931  | -3.027314 |
| H240 | -6.302982 | -1.598519 | 2.595795  | C47 | 2.324234  | 3.016123  | -2.046491 |
| H241 | -3.982124 | -5.794390 | -2.036028 | C48 | -0.034846 | 3.304899  | -2.996262 |
| H242 | -2.535302 | -8.230859 | -4.332853 | C49 | 1.976499  | 3.217656  | -0.567103 |
| H243 | -0.866422 | -1.737816 | -0.760609 | C50 | -5.434804 | 2.641074  | -4.662768 |
| H244 | -0.318329 | -1.670852 | 3.592035  | C51 | -5.604508 | 3.333580  | -3.303013 |
| H245 | 1.192631  | -2.183175 | 3.643062  | C52 | -6.429549 | 2.457035  | -2.349902 |
| S246 | 0.396140  | -5.420298 | -2.407113 | C53 | -4.243243 | 3.680507  | -2.682953 |
| H247 | 0.188471  | -4.165749 | -1.956934 | C54 | -6.754523 | -0.708621 | 0.238870  |
| H248 | -1.876954 | -5.419433 | 1.386366  | N55 | -5.312681 | -0.710469 | 0.404789  |
|      |           |           |           | C56 | -4.672087 | -1.045836 | 1.533184  |
|      |           |           |           | N57 | -5.344874 | -1.378300 | 2.661369  |
|      |           |           |           | N58 | -3.342932 | -0.997966 | 1.571776  |
|      |           |           |           | C59 | -2.838166 | -0.955019 | -4.581661 |
|      |           |           |           | C60 | -2.181713 | -1.480607 | -3.302217 |
|      |           |           |           | C61 | -2.768871 | -0.932558 | -2.000972 |
|      |           |           |           | O62 | -3.906663 | -0.427403 | -1.988312 |
|      |           |           |           | O63 | -2.055277 | -1.081866 | -0.928846 |
|      |           |           |           | C64 | -0.705842 | -0.324276 | -7.685712 |
|      |           |           |           | C65 | 0.487156  | -0.023190 | -6.804216 |
|      |           |           |           | O66 | 0.436506  | 0.787703  | -5.883804 |
|      |           |           |           | N67 | 1.620249  | -0.700643 | -7.145932 |
|      |           |           |           | C68 | 2.923583  | -0.426633 | -6.570522 |
|      |           |           |           | C69 | 3.587297  | -1.651559 | -5.904683 |
|      |           |           |           | C70 | 3.322985  | -1.832282 | -4.393124 |
|      |           |           |           | C71 | 4.071437  | -0.780132 | -3.560090 |
|      |           |           |           | C72 | 1.826790  | -1.846073 | -4.049597 |
|      |           |           |           | C73 | -0.923254 | -6.290976 | -4.563066 |
|      |           |           |           | C74 | -2.384764 | -6.220129 | -4.121536 |
|      |           |           |           | O75 | -2.926291 | -5.159332 | -3.803115 |

### TS attack at C2:

|     |           |          |           |
|-----|-----------|----------|-----------|
| C1  | -6.328857 | 5.541830 | 1.422878  |
| C2  | -5.898596 | 6.601785 | 0.421527  |
| O3  | -4.776134 | 6.572051 | -0.083115 |
| C4  | -7.798101 | 5.471700 | 1.850357  |
| C5  | -8.080285 | 4.447239 | 2.959717  |
| S6  | -7.733244 | 2.683805 | 2.556814  |
| C7  | -6.072936 | 2.446475 | 3.291225  |
| N8  | -6.800542 | 7.582849 | 0.150618  |
| C9  | -6.496816 | 8.682198 | -0.735647 |
| C10 | -1.286630 | 6.867207 | 0.315468  |
| C11 | -0.444377 | 7.148974 | -0.921268 |
| O12 | 0.762143  | 6.914548 | -0.968547 |
| C13 | -1.047799 | 5.456836 | 0.873911  |
| C14 | -1.912654 | 5.108786 | 2.100121  |
| C15 | -1.751357 | 3.624908 | 2.462203  |

|      |           |           |           |      |           |           |           |
|------|-----------|-----------|-----------|------|-----------|-----------|-----------|
| C76  | -0.063816 | -5.187329 | -3.952360 | H136 | 3.363054  | 3.335335  | -2.209043 |
| N77  | -3.066624 | -7.393965 | -4.174221 | H137 | 1.941336  | 4.284411  | -0.321112 |
| C78  | -4.497208 | -7.489330 | -3.894489 | H138 | 1.000027  | 2.791102  | -0.315053 |
| C79  | -4.853556 | -7.621748 | -2.404648 | H139 | 2.719679  | 2.741875  | 0.083474  |
| O80  | -5.501509 | -8.580216 | -1.994925 | H140 | 1.906518  | 2.677849  | -4.840233 |
| N81  | -4.420693 | -6.604129 | -1.618696 | H141 | -6.153842 | 4.273185  | -3.467412 |
| C82  | -4.819591 | -6.540775 | -0.219659 | H142 | -6.571506 | 2.942186  | -1.377300 |
| C83  | -4.023699 | -5.531581 | 0.613891  | H143 | -7.421396 | 2.238316  | -2.763312 |
| C84  | -2.547804 | -5.927998 | 0.746720  | H144 | -5.913146 | 1.505344  | -2.179507 |
| C85  | -4.693530 | -5.393545 | 1.988292  | H145 | -4.358152 | 4.266683  | -1.764497 |
| C86  | -2.321690 | -5.267043 | 5.533246  | H146 | -3.629215 | 4.267492  | -3.375531 |
| C87  | -1.738793 | -3.856679 | 5.358578  | H147 | -3.689985 | 2.765704  | -2.439836 |
| C88  | -2.535737 | -2.946048 | 4.407227  | H148 | -4.893706 | 1.694965  | -4.545939 |
| O89  | -3.780581 | -3.052244 | 4.371451  | H149 | -1.103187 | -1.289253 | -3.303766 |
| O90  | -1.868704 | -2.089935 | 3.715601  | H150 | -2.305873 | -2.571865 | -3.246568 |
| O91  | 0.602645  | -1.517816 | 3.341434  | H151 | -2.579676 | 0.093663  | -4.755467 |
| H92  | -8.128476 | 6.444257  | 2.245972  | H152 | -0.679361 | -1.331581 | -8.112543 |
| H93  | -8.429394 | 5.245463  | 0.982515  | H153 | 3.264312  | -2.554293 | -6.441362 |
| H94  | -7.521244 | 4.696285  | 3.868151  | H154 | 4.671852  | -1.582549 | -6.057191 |
| H95  | -9.142412 | 4.482559  | 3.219243  | H155 | 3.741479  | -2.813585 | -4.126406 |
| H96  | -6.072022 | 2.751797  | 4.340722  | H156 | 3.957810  | -0.980167 | -2.489376 |
| H97  | -5.860195 | 1.376156  | 3.242128  | H157 | 3.690218  | 0.230761  | -3.742540 |
| H98  | -5.297571 | 2.985803  | 2.743925  | H158 | 5.144367  | -0.781223 | -3.784428 |
| H99  | -6.022344 | 4.581693  | 0.996391  | H159 | 1.665593  | -2.073588 | -2.990736 |
| H100 | -7.227776 | 8.750093  | -1.548672 | H160 | 1.361889  | -0.876706 | -4.255648 |
| H101 | -1.262271 | 4.729651  | 0.080591  | H161 | 1.294348  | -2.598835 | -4.640236 |
| H102 | 0.015314  | 5.343071  | 1.116597  | H162 | 2.782158  | 0.389245  | -5.859905 |
| H103 | -2.960950 | 5.278531  | 1.814425  | H163 | -0.607662 | -4.244403 | -4.002812 |
| H104 | -2.383333 | 3.349653  | 3.314375  | H164 | 0.871555  | -5.089475 | -4.506556 |
| H105 | -2.020626 | 2.975291  | 1.622578  | H165 | -0.503391 | -7.283130 | -4.359264 |
| H106 | -0.713569 | 3.399783  | 2.737334  | H166 | -4.973554 | -6.593660 | -4.305560 |
| H107 | -2.217428 | 5.715756  | 4.175408  | H167 | -4.074649 | -4.554069 | 0.109554  |
| H108 | -1.777177 | 7.055071  | 3.112201  | H168 | -5.743533 | -5.094274 | 1.889329  |
| H109 | -0.548453 | 5.885449  | 3.616015  | H169 | -4.196585 | -4.651546 | 2.617208  |
| H110 | -0.997578 | 7.619521  | 1.060566  | H170 | -4.675881 | -6.351022 | 2.523552  |
| H111 | -0.827303 | 7.440647  | -4.035287 | H171 | -2.061192 | -6.029657 | -0.227568 |
| H112 | 0.525011  | -0.981105 | 9.049399  | H172 | -2.453611 | -6.886227 | 1.272475  |
| H113 | 4.292015  | 1.088384  | 8.948255  | H173 | -4.715145 | -7.546342 | 0.202024  |
| H114 | 0.446287  | -0.971913 | 6.574641  | H174 | -1.727721 | -3.346814 | 6.332819  |
| H115 | 4.197104  | 1.112778  | 6.464528  | H175 | -0.697247 | -3.898052 | 5.023128  |
| H116 | 1.571167  | -0.297831 | 4.576714  | H176 | -2.261322 | -5.837149 | 4.600569  |
| H117 | 4.238471  | -5.300608 | 4.862393  | H177 | 8.796058  | 2.520606  | -4.927155 |
| H118 | 4.494749  | -4.509543 | 6.411561  | H178 | 10.297346 | 1.089412  | -3.528521 |
| H119 | 1.826892  | -5.731249 | 5.463035  | H179 | 10.950737 | 0.382398  | -0.686642 |
| H120 | 7.272050  | 2.869014  | 3.074563  | H180 | 11.796374 | -1.191580 | -0.660989 |
| H121 | 7.638226  | 1.230779  | 3.552611  | H181 | -7.199376 | -1.693806 | 0.436622  |
| H122 | 6.463387  | 1.996095  | 0.836916  | H182 | -7.243913 | 0.035758  | 0.878817  |
| H123 | 5.882281  | -0.427222 | 0.660138  | H183 | -6.967144 | -0.449782 | -0.798502 |
| H124 | 6.711318  | -0.748045 | 2.188822  | H184 | -2.845789 | -1.331652 | 2.412640  |
| H125 | 7.628346  | -0.219639 | 0.768142  | C185 | 0.327413  | -2.373311 | 1.332155  |
| H126 | 4.889002  | 2.576711  | 2.683004  | C186 | 0.743881  | -1.268828 | 0.454880  |
| H127 | 4.282437  | 1.213539  | 1.737891  | O187 | 0.161727  | -2.048724 | -0.606357 |
| H128 | 5.008428  | 0.932798  | 3.323416  | C188 | 2.261159  | -1.331285 | 0.404076  |
| H129 | 9.330139  | 1.000807  | 1.740367  | C189 | 1.375143  | -3.446065 | 1.325507  |
| H130 | 7.640630  | 5.388978  | -0.352630 | C190 | 2.573598  | -2.842370 | 0.539203  |
| H131 | 1.435509  | 4.844089  | -2.712056 | H191 | 0.280628  | -0.289206 | 0.573569  |
| H132 | -0.474432 | 3.379419  | -1.996765 | H192 | 2.654883  | -0.887553 | -0.513659 |
| H133 | -0.657692 | 3.901588  | -3.671995 | H193 | 3.525310  | -3.023208 | 1.044716  |
| H134 | -0.106009 | 2.262294  | -3.327650 | H194 | 2.653120  | -0.766384 | 1.256906  |
| H135 | 2.293029  | 1.944921  | -2.296394 | H195 | 2.632058  | -3.303768 | -0.448756 |

|      |           |           |           |
|------|-----------|-----------|-----------|
| H196 | 1.628612  | -3.710632 | 2.354967  |
| H197 | 0.977207  | -4.357098 | 0.867014  |
| H198 | -0.702156 | -2.523009 | 1.631763  |
| H199 | 1.402427  | 4.337562  | -5.141049 |
| H200 | 8.428214  | 2.722752  | -3.205697 |
| H201 | 9.279853  | 0.077129  | -4.543704 |
| H202 | 9.144090  | 6.058427  | 0.320357  |
| H203 | 9.210756  | 4.723718  | -0.853199 |
| H204 | 9.683107  | 2.352539  | 2.805210  |
| H205 | 2.453047  | 0.029671  | 10.262466 |
| H206 | 2.928990  | -6.483915 | 6.634425  |
| H207 | 2.081480  | -4.983081 | 7.041607  |
| H208 | -1.778565 | -5.821956 | 6.304821  |
| H209 | -3.375052 | -5.205355 | 5.815757  |
| H210 | -5.890251 | -6.295910 | -0.157622 |
| H211 | -4.898475 | -8.370381 | -4.396025 |
| H212 | -0.916169 | -6.171211 | -5.655603 |
| H213 | 3.581719  | -0.047908 | -7.363908 |
| H214 | -0.736491 | 0.395559  | -8.511431 |
| H215 | -3.925561 | -1.031508 | -4.509362 |
| H216 | -2.836748 | -0.889500 | 0.683011  |
| H217 | -4.735510 | -0.504936 | -0.433061 |
| H218 | -0.707848 | 9.125764  | -3.471426 |
| H219 | 0.578992  | 7.955816  | -3.078228 |
| H220 | -6.479854 | 9.638755  | -0.200102 |
| H221 | -5.510115 | 8.497291  | -1.159383 |
| H222 | -5.690958 | 5.693577  | 2.304321  |
| H223 | 7.370803  | 1.739168  | -4.229347 |
| H224 | 11.873997 | -0.171329 | -2.112141 |
| H225 | 8.650108  | 0.768805  | -1.622412 |
| H226 | 7.740524  | -0.359470 | -2.641391 |
| H227 | -2.353510 | 7.007530  | 0.110807  |
| H228 | -1.616332 | -0.202307 | -7.100552 |
| H229 | -6.404649 | 2.417358  | -5.122389 |
| H230 | -4.868583 | 3.267178  | -5.361619 |
| H231 | -2.506582 | -1.539475 | -5.444981 |
| H232 | 3.022807  | 4.023749  | -4.502058 |
| H233 | 4.905340  | -2.387696 | 5.580282  |
| H234 | 3.681682  | -1.468394 | 4.758481  |
| H235 | 8.222398  | 4.381452  | 1.919024  |
| H236 | 1.580267  | -1.318644 | -7.942609 |
| H237 | -2.132549 | 7.788205  | -1.877408 |
| H238 | -7.706311 | 7.550801  | 0.589444  |
| H239 | -4.811930 | -1.922217 | 3.366411  |
| H240 | -6.322838 | -1.604937 | 2.569425  |
| H241 | -4.005217 | -5.794563 | -2.069520 |
| H242 | -2.552148 | -8.251231 | -4.309487 |
| H243 | -0.835958 | -1.663576 | -0.824449 |
| H244 | -0.351138 | -1.731079 | 3.626221  |
| H245 | 1.167979  | -2.201501 | 3.774521  |
| S246 | 0.333595  | -5.527588 | -2.177709 |
| H247 | 0.212559  | -4.260774 | -1.729474 |
| H248 | -1.997248 | -5.177549 | 1.324925  |



## 4.6 Mutant S2

The following atoms were kept fixed in the geometry optimizations of reactant and transition state structures: 1, 9, 10, 18, 19, 26, 31, 39, 40, 45, 47, 51, 56, 61, 65, 75, 79, 83.

### Reactant:

|     |           |           |           |      |           |           |           |
|-----|-----------|-----------|-----------|------|-----------|-----------|-----------|
| C1  | -6.397227 | 5.667616  | 1.203139  | C51  | -6.786428 | -0.622650 | 0.237592  |
| C2  | -5.980071 | 6.667019  | 0.134300  | N52  | -5.348812 | -0.589561 | 0.468232  |
| O3  | -4.884050 | 6.584089  | -0.420145 | C53  | -4.728522 | -0.933654 | 1.613984  |
| C4  | -7.890672 | 5.466445  | 1.481493  | N54  | -5.417873 | -1.307391 | 2.709502  |
| C5  | -8.187447 | 4.473638  | 2.615987  | N55  | -3.402462 | -0.848425 | 1.695972  |
| S6  | -7.638379 | 2.735353  | 2.346314  | C56  | -2.836410 | -1.020070 | -4.545244 |
| C7  | -6.046137 | 2.687366  | 3.248227  | C57  | -2.185298 | -1.648852 | -3.311861 |
| N8  | -6.864963 | 7.663983  | -0.136114 | C58  | -2.739236 | -1.101902 | -2.014004 |
| C9  | -6.564834 | 8.729110  | -1.065896 | O59  | -3.743197 | -0.408699 | -1.946709 |
| C10 | -1.353691 | 6.977244  | 0.083025  | O60  | -2.106339 | -1.430938 | -0.880824 |
| C11 | -0.506766 | 7.223256  | -1.158245 | C61  | -0.685989 | -0.488937 | -7.655445 |
| O12 | 0.705264  | 7.011383  | -1.193080 | C62  | 0.476606  | -0.242390 | -6.715487 |
| C13 | -1.050283 | 5.633109  | 0.757143  | O63  | 0.369915  | 0.448138  | -5.703542 |
| C14 | -1.950291 | 5.324571  | 1.969032  | N64  | 1.643100  | -0.824671 | -7.110104 |
| C15 | -1.719260 | 3.885621  | 2.453205  | C65  | 2.936223  | -0.534555 | -6.513363 |
| C16 | -1.748053 | 6.318201  | 3.123413  | C66  | 3.669489  | -1.765069 | -5.937917 |
| N17 | -1.190612 | 7.741515  | -2.221930 | C67  | 3.385523  | -2.115157 | -4.459836 |
| C18 | -0.544649 | 8.071597  | -3.478233 | C68  | 3.968344  | -1.067581 | -3.498630 |
| C19 | 2.323391  | 0.485661  | 9.205195  | C69  | 1.895165  | -2.350642 | -4.177127 |
| C20 | 1.272216  | -0.109868 | 8.503466  | C70  | -0.876586 | -6.587067 | -4.506181 |
| C21 | 3.381285  | 1.051276  | 8.488531  | C71  | -2.293704 | -6.409299 | -3.969435 |
| C22 | 1.274538  | -0.156700 | 7.108470  | O72  | -2.750821 | -5.305985 | -3.657093 |
| C23 | 3.395822  | 1.015271  | 7.095410  | C73  | 0.118850  | -5.620367 | -3.875287 |
| C24 | 2.342977  | 0.407367  | 6.396107  | N74  | -3.042236 | -7.539513 | -3.927744 |
| O25 | 2.430942  | 0.357630  | 5.037333  | C75  | -4.470336 | -7.533962 | -3.638959 |
| C26 | 2.522503  | -5.185918 | 6.459470  | C76  | -4.861839 | -7.603776 | -2.154000 |
| C27 | 3.644447  | -4.606391 | 5.587232  | O77  | -5.629210 | -8.474208 | -1.755686 |
| C28 | 3.175681  | -3.329134 | 4.908678  | N78  | -4.335405 | -6.629883 | -1.366496 |
| N29 | 3.894281  | -2.210481 | 5.136707  | C79  | -4.821928 | -6.458018 | -0.002093 |
| O30 | 2.169915  | -3.345037 | 4.183197  | C80  | -3.881951 | -5.688978 | 0.928169  |
| C31 | 8.920839  | 2.211303  | 2.052673  | C81  | -2.559217 | -6.432786 | 1.149336  |
| C32 | 9.048389  | 3.067972  | 0.812682  | C82  | -4.620447 | -5.435817 | 2.250975  |
| O33 | 9.544999  | 2.660813  | -0.238196 | C83  | -2.368891 | -4.970362 | 5.718688  |
| C34 | 7.498941  | 2.109491  | 2.644650  | C84  | -1.812203 | -3.558801 | 5.484229  |
| C35 | 6.415925  | 1.569062  | 1.689506  | C85  | -2.606925 | -2.717224 | 4.470844  |
| C36 | 6.682444  | 0.115732  | 1.270140  | O86  | -3.854197 | -2.863280 | 4.420188  |
| C37 | 5.023927  | 1.706201  | 2.323206  | O87  | -1.943573 | -1.896240 | 3.748219  |
| N38 | 8.600557  | 4.341820  | 0.968229  | O88  | 0.656275  | -1.062754 | 3.747254  |
| C39 | 8.595629  | 5.284953  | -0.119026 | H89  | -8.362335 | 6.414791  | 1.781252  |
| C40 | 8.399794  | 2.015683  | -4.030618 | H90  | -8.397884 | 5.134726  | 0.568096  |
| C41 | 9.315190  | 0.838900  | -3.672855 | H91  | -7.747908 | 4.816880  | 3.558742  |
| C42 | 8.825605  | 0.110744  | -2.419127 | H92  | -9.268910 | 4.416975  | 2.770013  |
| S43 | 9.905126  | -1.252893 | -1.823459 | H93  | -6.176438 | 3.043435  | 4.273217  |
| C44 | 11.341231 | -0.290057 | -1.218129 | H94  | -5.741652 | 1.638760  | 3.281609  |
| C45 | 1.955088  | 3.660980  | -4.552584 | H95  | -5.268556 | 3.266210  | 2.746416  |
| C46 | 0.960987  | 3.976964  | -3.423525 | H96  | -5.946750 | 4.715739  | 0.909734  |
| C47 | -5.448767 | 2.558466  | -4.770337 | H97  | -7.404592 | 8.896825  | -1.747569 |
| C48 | -5.580703 | 3.412953  | -3.502054 | H98  | -1.170808 | 4.831823  | 0.018779  |
| C49 | -6.387966 | 2.669538  | -2.428392 | H99  | 0.003877  | 5.612133  | 1.057237  |
| C50 | -4.205191 | 3.828859  | -2.961167 | H100 | -2.992839 | 5.407176  | 1.626648  |

|      |           |           |           |      |           |           |           |
|------|-----------|-----------|-----------|------|-----------|-----------|-----------|
| H101 | -2.378656 | 3.635400  | 3.292253  | H161 | -2.742376 | -7.413961 | 1.603755  |
| H102 | -1.899531 | 3.159484  | 1.654031  | H162 | -5.011817 | -7.459188 | 0.396710  |
| H103 | -0.686735 | 3.746909  | 2.794900  | H163 | -1.829615 | -2.999757 | 6.430682  |
| H104 | -2.389186 | 6.065880  | 3.975737  | H164 | -0.765233 | -3.591134 | 5.165856  |
| H105 | -1.980607 | 7.347599  | 2.832060  | H165 | -2.287554 | -5.583295 | 4.814975  |
| H106 | -0.709534 | 6.297966  | 3.476221  | H166 | 8.752505  | 2.536357  | -4.927251 |
| H107 | -1.128724 | 7.801641  | 0.772583  | H167 | 10.330413 | 1.214962  | -3.501851 |
| H108 | -0.734851 | 7.316306  | -4.251027 | H168 | 10.996891 | 0.571339  | -0.640618 |
| H109 | 0.439125  | -0.550025 | 9.045025  | H169 | 11.923604 | -0.954681 | -0.575799 |
| H110 | 4.203215  | 1.526624  | 9.017432  | H170 | -7.205024 | -1.627907 | 0.379095  |
| H111 | 0.465104  | -0.631138 | 6.562065  | H171 | -7.318865 | 0.082729  | 0.885238  |
| H112 | 4.209954  | 1.457264  | 6.528802  | H172 | -6.961714 | -0.326343 | -0.796510 |
| H113 | 1.618433  | -0.061395 | 4.620643  | H173 | -2.891748 | -1.207021 | 2.539073  |
| H114 | 3.904031  | -5.319269 | 4.796435  | C174 | -0.080106 | -3.366346 | 1.001997  |
| H115 | 4.550485  | -4.432081 | 6.177802  | C175 | 0.709621  | -2.183564 | 0.670863  |
| H116 | 1.628188  | -5.354117 | 5.855787  | O176 | 0.024840  | -2.928970 | -0.407283 |
| H117 | 7.179633  | 3.092887  | 3.018655  | C177 | 2.180982  | -2.506481 | 0.777768  |
| H118 | 7.546232  | 1.465930  | 3.533558  | C178 | 0.855679  | -4.504801 | 1.346531  |
| H119 | 6.429021  | 2.190552  | 0.782151  | C179 | 2.232472  | -4.054552 | 0.793962  |
| H120 | 5.889930  | -0.244291 | 0.606043  | H180 | 0.334113  | -1.177847 | 0.821521  |
| H121 | 6.702610  | -0.544023 | 2.146815  | H181 | 2.775699  | -2.060736 | -0.025892 |
| H122 | 7.631318  | -0.001561 | 0.738714  | H182 | 3.054691  | -4.428497 | 1.408127  |
| H123 | 4.818804  | 2.740501  | 2.622196  | H183 | 2.529711  | -2.091643 | 1.728816  |
| H124 | 4.242576  | 1.409426  | 1.616882  | H184 | 2.378331  | -4.437799 | -0.218893 |
| H125 | 4.920830  | 1.078514  | 3.216228  | H185 | 0.892388  | -4.573952 | 2.439100  |
| H126 | 9.296990  | 1.220897  | 1.788214  | H186 | 0.526131  | -5.471638 | 0.954630  |
| H127 | 7.590395  | 5.433083  | -0.533324 | H187 | -1.077488 | -3.291903 | 1.424963  |
| H128 | 1.066560  | 5.020938  | -3.111571 | H188 | 1.835552  | 4.364686  | -5.384355 |
| H129 | 1.795535  | 2.652198  | -4.945066 | H189 | 8.367070  | 2.739409  | -3.209561 |
| H130 | -6.131480 | 4.328137  | -3.766788 | H190 | 9.379585  | 0.131358  | -4.508267 |
| H131 | -6.519481 | 3.281131  | -1.529235 | H191 | 8.982564  | 6.256347  | 0.205992  |
| H132 | -7.383019 | 2.391016  | -2.794946 | H192 | 9.239663  | 4.889574  | -0.904447 |
| H133 | -5.867300 | 1.750982  | -2.131593 | H193 | 9.598120  | 2.612617  | 2.818519  |
| H134 | -4.300741 | 4.493780  | -2.096295 | H194 | 2.313992  | 0.515503  | 10.290276 |
| H135 | -3.621057 | 4.354189  | -3.725608 | H195 | 2.829097  | -6.137374 | 6.903182  |
| H136 | -3.630147 | 2.947703  | -2.652036 | H196 | 2.260900  | -4.500785 | 7.271846  |
| H137 | -4.923861 | 1.621493  | -4.548910 | H197 | -1.822920 | -5.479023 | 6.519964  |
| H138 | -1.099317 | -1.497997 | -3.321432 | H198 | -3.426098 | -4.918307 | 5.988936  |
| H139 | -2.344665 | -2.737083 | -3.296147 | H199 | -5.798089 | -5.949867 | -0.026940 |
| H140 | -2.514384 | 0.016248  | -4.671368 | H200 | -4.931068 | -8.397151 | -4.120637 |
| H141 | -0.658317 | -1.485592 | -8.107181 | H201 | -0.922581 | -6.389901 | -5.586691 |
| H142 | 3.440611  | -2.633938 | -6.570619 | H202 | 3.569151  | -0.066905 | -7.278576 |
| H143 | 4.747982  | -1.592665 | -6.044161 | H203 | -0.658996 | 0.248805  | -8.465402 |
| H144 | 3.914685  | -3.060073 | -4.270066 | H204 | -3.924896 | -1.038226 | -4.458817 |
| H145 | 3.851836  | -1.390221 | -2.458615 | H205 | -2.876492 | -0.739984 | 0.837281  |
| H146 | 3.462055  | -0.100579 | -3.588758 | H206 | -4.750441 | -0.375116 | -0.332215 |
| H147 | 5.037699  | -0.910393 | -3.679693 | H207 | -0.890480 | 9.043451  | -3.845252 |
| H148 | 1.747116  | -2.712392 | -3.153457 | H208 | 0.529157  | 8.114805  | -3.293915 |
| H149 | 1.322006  | -1.425702 | -4.294143 | H209 | -6.338475 | 9.670795  | -0.550770 |
| H150 | 1.474641  | -3.093680 | -4.863265 | H210 | -5.689877 | 8.428409  | -1.641949 |
| H151 | 2.758905  | 0.218087  | -5.743101 | H211 | -5.884922 | 5.974065  | 2.126415  |
| H152 | -0.302144 | -4.615523 | -3.886590 | H212 | 7.373399  | 1.681152  | -4.222166 |
| H153 | 1.051571  | -5.615328 | -4.442869 | H213 | 11.976598 | 0.048745  | -2.039995 |
| H154 | -0.543563 | -7.625139 | -4.393437 | H214 | 8.701676  | 0.821212  | -1.597009 |
| H155 | -4.890776 | -6.619643 | -4.070871 | H215 | 7.854924  | -0.363168 | -2.604953 |
| H156 | -3.661656 | -4.712329 | 0.467993  | H216 | -2.422186 | 7.043501  | -0.152569 |
| H157 | -5.588593 | -4.952638 | 2.074379  | H217 | -1.622469 | -0.361115 | -7.115153 |
| H158 | -4.060906 | -4.788897 | 2.928919  | H218 | -6.430748 | 2.300413  | -5.183780 |
| H159 | -4.817864 | -6.383103 | 2.767651  | H219 | -4.884245 | 3.082620  | -5.549585 |
| H160 | -2.022671 | -6.595789 | 0.209271  | H220 | -2.551147 | -1.580670 | -5.438733 |

|      |           |           |           |     |           |           |           |
|------|-----------|-----------|-----------|-----|-----------|-----------|-----------|
| H221 | 2.988085  | 3.734120  | -4.196092 | C27 | 3.640736  | -4.823703 | 5.508133  |
| H222 | 4.613592  | -2.212043 | 5.842574  | C28 | 3.188131  | -3.529420 | 4.858135  |
| H223 | 3.510215  | -1.302830 | 4.868794  | N29 | 3.945922  | -2.432144 | 5.052448  |
| H224 | 8.144225  | 4.590874  | 1.831965  | O30 | 2.151043  | -3.513997 | 4.176058  |
| H225 | 1.637024  | -1.346454 | -7.974241 | C31 | 8.960014  | 1.981686  | 2.057701  |
| H226 | -2.196537 | 7.787617  | -2.160060 | C32 | 9.089452  | 2.865912  | 0.837222  |
| H227 | -7.730958 | 7.700031  | 0.377030  | O33 | 9.556632  | 2.471160  | -0.231378 |
| H228 | -4.880756 | -1.843366 | 3.430763  | C34 | 7.544301  | 1.903283  | 2.667551  |
| H229 | -6.398527 | -1.515078 | 2.607106  | C35 | 6.433467  | 1.426316  | 1.710431  |
| H230 | -3.826100 | -5.879304 | -1.822459 | C36 | 6.641314  | -0.024743 | 1.252508  |
| H231 | -2.592696 | -8.428331 | -4.086209 | C37 | 5.053473  | 1.601795  | 2.360313  |
| H232 | -1.311178 | -2.033348 | -0.937912 | N38 | 8.673320  | 4.145069  | 1.030274  |
| H233 | -0.299649 | -1.301099 | 3.835004  | C39 | 8.666500  | 5.112468  | -0.035481 |
| H234 | 1.142076  | -1.908386 | 3.837425  | C40 | 8.417861  | 1.944700  | -4.026778 |
| S235 | 0.493759  | -6.071142 | -2.122784 | C41 | 9.293093  | 0.731122  | -3.692101 |
| H236 | 0.360972  | -4.834497 | -1.600251 | C42 | 8.777448  | -0.006010 | -2.453969 |
| H237 | -1.904974 | -5.873196 | 1.825361  | S43 | 9.816068  | -1.409545 | -1.877542 |
| C238 | 1.137384  | 3.083601  | -2.213176 | C44 | 11.283700 | -0.498832 | -1.267230 |
| C239 | 1.526158  | 3.621025  | -0.978626 | C45 | 1.992610  | 3.682294  | -4.485684 |
| H240 | 1.666880  | 4.694740  | -0.890221 | C46 | 1.044288  | 4.121510  | -3.358143 |
| C241 | 1.695534  | 2.797801  | 0.136798  | C47 | -5.425059 | 2.677429  | -4.705817 |
| H242 | 1.980601  | 3.235544  | 1.089589  | C48 | -5.544813 | 3.445400  | -3.382115 |
| C243 | 1.486806  | 1.421153  | 0.036787  | C49 | -5.991986 | 2.508048  | -2.251255 |
| H244 | 1.614329  | 0.792297  | 0.913811  | C50 | -4.228573 | 4.151243  | -3.025463 |
| C245 | 0.928315  | 1.699451  | -2.305823 | C51 | -6.786896 | -0.611078 | 0.225643  |
| H246 | 0.624594  | 1.265661  | -3.255601 | N52 | -5.347096 | -0.695876 | 0.384078  |
| C247 | 1.104635  | 0.876989  | -1.192542 | C53 | -4.712108 | -1.028283 | 1.516680  |
| H248 | -0.059905 | 3.865458  | -3.813565 | N54 | -5.384511 | -1.276614 | 2.666448  |
| H249 | 0.933941  | -0.191162 | -1.290708 | N55 | -3.382952 | -1.064375 | 1.532478  |
|      |           |           |           | C56 | -2.856872 | -0.937723 | -4.578972 |
|      |           |           |           | C57 | -2.210066 | -1.593430 | -3.352164 |
|      |           |           |           | C58 | -2.764583 | -1.109573 | -2.012980 |
|      |           |           |           | O59 | -3.878046 | -0.557238 | -1.969764 |
|      |           |           |           | O60 | -2.059437 | -1.340579 | -0.946949 |
|      |           |           |           | C61 | -0.709569 | -0.355689 | -7.682209 |
|      |           |           |           | C62 | 0.478258  | -0.065682 | -6.788231 |
|      |           |           |           | O63 | 0.426941  | 0.750963  | -5.871504 |
|      |           |           |           | N64 | 1.606614  | -0.756943 | -7.116407 |
|      |           |           |           | C65 | 2.915288  | -0.474745 | -6.553894 |
|      |           |           |           | C66 | 3.584091  | -1.677649 | -5.856724 |
|      |           |           |           | C67 | 3.282987  | -1.864757 | -4.352398 |
|      |           |           |           | C68 | 3.931560  | -0.764655 | -3.497684 |
|      |           |           |           | C69 | 1.782362  | -1.979476 | -4.050304 |
|      |           |           |           | C70 | -0.990464 | -6.388970 | -4.645859 |
|      |           |           |           | C71 | -2.415371 | -6.271249 | -4.111383 |
|      |           |           |           | O72 | -2.899634 | -5.194317 | -3.755629 |
|      |           |           |           | C73 | -0.039544 | -5.365308 | -4.033078 |
|      |           |           |           | N74 | -3.141483 | -7.417969 | -4.128825 |
|      |           |           |           | C75 | -4.569147 | -7.451483 | -3.830045 |
|      |           |           |           | C76 | -4.934027 | -7.573173 | -2.341379 |
|      |           |           |           | O77 | -5.638748 | -8.495836 | -1.943514 |
|      |           |           |           | N78 | -4.459498 | -6.576476 | -1.551400 |
|      |           |           |           | C79 | -4.896100 | -6.462532 | -0.166284 |
|      |           |           |           | C80 | -3.955664 | -5.646391 | 0.726150  |
|      |           |           |           | C81 | -2.584639 | -6.317374 | 0.877740  |
|      |           |           |           | C82 | -4.636269 | -5.432923 | 2.085478  |
|      |           |           |           | C83 | -2.407111 | -5.148898 | 5.581510  |
|      |           |           |           | C84 | -1.800610 | -3.750658 | 5.398801  |
|      |           |           |           | C85 | -2.572328 | -2.857909 | 4.411606  |
|      |           |           |           | O86 | -3.821325 | -2.921566 | 4.397842  |

### TS attack at C1:

|     |           |           |           |  |  |  |  |
|-----|-----------|-----------|-----------|--|--|--|--|
| C1  | -6.316277 | 5.647773  | 1.346586  |  |  |  |  |
| C2  | -5.883638 | 6.685771  | 0.323243  |  |  |  |  |
| O3  | -4.772941 | 6.625560  | -0.204600 |  |  |  |  |
| C4  | -7.786533 | 5.583071  | 1.770300  |  |  |  |  |
| C5  | -8.071516 | 4.570741  | 2.890665  |  |  |  |  |
| S6  | -7.722433 | 2.802655  | 2.508518  |  |  |  |  |
| C7  | -6.051929 | 2.577240  | 3.224028  |  |  |  |  |
| N8  | -6.768570 | 7.682976  | 0.056816  |  |  |  |  |
| C9  | -6.452653 | 8.766884  | -0.844738 |  |  |  |  |
| C10 | -1.260263 | 6.922378  | 0.242441  |  |  |  |  |
| C11 | -0.404616 | 7.223249  | -0.981115 |  |  |  |  |
| O12 | 0.817285  | 7.075920  | -0.995408 |  |  |  |  |
| C13 | -0.931238 | 5.567500  | 0.883504  |  |  |  |  |
| C14 | -1.835539 | 5.209322  | 2.078272  |  |  |  |  |
| C15 | -1.580135 | 3.763471  | 2.528454  |  |  |  |  |
| C16 | -1.665559 | 6.177248  | 3.259482  |  |  |  |  |
| N17 | -1.096092 | 7.720879  | -2.050181 |  |  |  |  |
| C18 | -0.448587 | 8.095318  | -3.293109 |  |  |  |  |
| C19 | 2.363578  | 0.159664  | 9.187217  |  |  |  |  |
| C20 | 1.268506  | -0.399918 | 8.522406  |  |  |  |  |
| C21 | 3.409429  | 0.692349  | 8.427885  |  |  |  |  |
| C22 | 1.215645  | -0.446184 | 7.125900  |  |  |  |  |
| C23 | 3.369301  | 0.656589  | 7.034654  |  |  |  |  |
| C24 | 2.273675  | 0.081404  | 6.376628  |  |  |  |  |
| O25 | 2.328439  | 0.033080  | 5.007021  |  |  |  |  |
| C26 | 2.483468  | -5.443524 | 6.300112  |  |  |  |  |

|      |           |           |           |      |           |           |           |
|------|-----------|-----------|-----------|------|-----------|-----------|-----------|
| O87  | -1.882315 | -2.075408 | 3.661486  | H147 | 5.007715  | -0.688605 | -3.692106 |
| O88  | 0.603308  | -1.463217 | 3.355999  | H148 | 1.615606  | -2.234469 | -2.998116 |
| H89  | -8.118998 | 6.559949  | 2.153569  | H149 | 1.265118  | -1.036267 | -4.252204 |
| H90  | -8.414914 | 5.346934  | 0.903191  | H150 | 1.312667  | -2.756852 | -4.662319 |
| H91  | -7.515539 | 4.830029  | 3.798133  | H151 | 2.780416  | 0.360207  | -5.864035 |
| H92  | -9.134459 | 4.608316  | 3.146316  | H152 | -0.515166 | -4.385060 | -4.033487 |
| H93  | -6.038969 | 2.889684  | 4.271328  | H153 | 0.880623  | -5.310669 | -4.618191 |
| H94  | -5.835232 | 1.507278  | 3.178836  | H154 | -0.609365 | -7.408744 | -4.518247 |
| H95  | -5.285735 | 3.115923  | 2.663464  | H155 | -5.011748 | -6.534420 | -4.232574 |
| H96  | -6.006911 | 4.680263  | 0.939897  | H156 | -3.809758 | -4.659235 | 0.260256  |
| H97  | -7.245907 | 8.902456  | -1.587127 | H157 | -5.620693 | -4.966297 | 1.965572  |
| H98  | -1.029741 | 4.784387  | 0.123000  | H158 | -4.053777 | -4.787865 | 2.746639  |
| H99  | 0.121274  | 5.560100  | 1.189857  | H159 | -4.788035 | -6.392076 | 2.596123  |
| H100 | -2.876243 | 5.279728  | 1.728138  | H160 | -2.089932 | -6.453976 | -0.088842 |
| H101 | -2.246841 | 3.477430  | 3.350203  | H161 | -2.688129 | -7.305061 | 1.343563  |
| H102 | -1.732222 | 3.055543  | 1.707504  | H162 | -5.002869 | -7.479690 | 0.223364  |
| H103 | -0.549369 | 3.639988  | 2.881946  | H163 | -1.805632 | -3.224597 | 6.364087  |
| H104 | -2.308980 | 5.889559  | 4.098883  | H164 | -0.753780 | -3.811758 | 5.082984  |
| H105 | -1.917787 | 7.208101  | 2.991111  | H165 | -2.342623 | -5.731424 | 4.656748  |
| H106 | -0.629910 | 6.170968  | 3.621650  | H166 | 8.790109  | 2.471704  | -4.911648 |
| H107 | -1.064313 | 7.732876  | 0.956545  | H167 | 10.319756 | 1.070261  | -3.512496 |
| H108 | -0.603027 | 7.347048  | -4.080387 | H168 | 10.968599 | 0.363067  | -0.674194 |
| H109 | 0.440797  | -0.812386 | 9.092572  | H169 | 11.850808 | -1.190272 | -0.639714 |
| H110 | 4.265733  | 1.143051  | 8.922057  | H170 | -7.288678 | -1.566042 | 0.435811  |
| H111 | 0.363461  | -0.890859 | 6.618888  | H171 | -7.227837 | 0.167212  | 0.860169  |
| H112 | 4.174266  | 1.076845  | 6.439317  | H172 | -6.989201 | -0.349228 | -0.813059 |
| H113 | 1.518597  | -0.345267 | 4.591256  | H173 | -2.880244 | -1.380894 | 2.379223  |
| H114 | 3.949032  | -5.503462 | 4.704973  | C174 | -0.119886 | -3.031449 | 0.939484  |
| H115 | 4.515597  | -4.660271 | 6.146620  | C175 | 0.639130  | -1.789417 | 1.144223  |
| H116 | 1.622441  | -5.598648 | 5.647507  | O176 | -0.056782 | -2.625857 | -0.447256 |
| H117 | 7.260165  | 2.883832  | 3.075561  | C177 | 2.107698  | -2.048096 | 0.985276  |
| H118 | 7.584399  | 1.231343  | 3.535773  | C178 | 0.855226  | -4.168409 | 1.201980  |
| H119 | 6.461077  | 2.069009  | 0.818634  | C179 | 2.229084  | -3.585427 | 0.786467  |
| H120 | 5.836142  | -0.334570 | 0.578219  | H180 | 0.169717  | -0.817739 | 1.103047  |
| H121 | 6.635704  | -0.708643 | 2.110917  | H181 | 2.510241  | -1.466782 | 0.150500  |
| H122 | 7.584716  | -0.165405 | 0.717307  | H182 | 3.040775  | -4.005919 | 1.382963  |
| H123 | 4.892283  | 2.635649  | 2.686235  | H183 | 2.616871  | -1.697032 | 1.885901  |
| H124 | 4.253182  | 1.352394  | 1.656749  | H184 | 2.431797  | -3.807008 | -0.263201 |
| H125 | 4.936699  | 0.957305  | 3.240445  | H185 | 0.843806  | -4.399394 | 2.271251  |
| H126 | 9.305490  | 0.988884  | 1.762229  | H186 | 0.586453  | -5.074967 | 0.654505  |
| H127 | 7.653446  | 5.307593  | -0.408737 | H187 | -1.129399 | -3.112641 | 1.339630  |
| H128 | 1.234628  | 5.165349  | -3.087755 | H188 | 1.917194  | 4.361283  | -5.342844 |
| H129 | 1.745768  | 2.676528  | -4.837762 | H189 | 8.407048  | 2.651926  | -3.190871 |
| H130 | -6.317240 | 4.219323  | -3.509764 | H190 | 9.335762  | 0.039035  | -4.541668 |
| H131 | -6.095369 | 3.046329  | -1.302181 | H191 | 9.102439  | 6.061066  | 0.294936  |
| H132 | -6.960796 | 2.047562  | -2.480191 | H192 | 9.266372  | 4.710740  | -0.851930 |
| H133 | -5.262169 | 1.702883  | -2.107935 | H193 | 9.658747  | 2.344753  | 2.823225  |
| H134 | -4.329025 | 4.751729  | -2.114996 | H194 | 2.395182  | 0.188135  | 10.271378 |
| H135 | -3.906087 | 4.817539  | -3.834479 | H195 | 2.778825  | -6.406836 | 6.725114  |
| H136 | -3.428481 | 3.419477  | -2.860840 | H196 | 2.174453  | -4.790862 | 7.122411  |
| H137 | -4.670369 | 1.886359  | -4.625741 | H197 | -1.884992 | -5.704696 | 6.367098  |
| H138 | -1.123808 | -1.452689 | -3.354457 | H198 | -3.463073 | -5.066396 | 5.848348  |
| H139 | -2.383045 | -2.678888 | -3.375145 | H199 | -5.900867 | -6.014622 | -0.135142 |
| H140 | -2.541973 | 0.105141  | -4.679934 | H200 | -5.013324 | -8.311626 | -4.331890 |
| H141 | -0.697815 | -1.370419 | -8.091687 | H201 | -1.046071 | -6.211316 | -5.729497 |
| H142 | 3.307291  | -2.592259 | -6.399641 | H202 | 3.569682  | -0.120072 | -7.361339 |
| H143 | 4.670408  | -1.575368 | -5.975371 | H203 | -0.709347 | 0.349652  | -8.520970 |
| H144 | 3.755734  | -2.816638 | -4.070144 | H204 | -3.945012 | -0.958696 | -4.488807 |
| H145 | 3.800055  | -0.975329 | -2.431014 | H205 | -2.881116 | -1.013398 | 0.637896  |
| H146 | 3.481986  | 0.216567  | -3.683903 | H206 | -4.759321 | -0.562554 | -0.459963 |

|      |           |           |           |     |           |           |           |
|------|-----------|-----------|-----------|-----|-----------|-----------|-----------|
| H207 | -0.824153 | 9.060663  | -3.648287 | C13 | -0.766914 | 5.690195  | 0.956038  |
| H208 | 0.620728  | 8.173841  | -3.094538 | C14 | -1.668549 | 5.348046  | 2.157803  |
| H209 | -6.309612 | 9.713086  | -0.308858 | C15 | -1.224117 | 4.026691  | 2.802021  |
| H210 | -5.524907 | 8.509882  | -1.355247 | C16 | -1.711702 | 6.468564  | 3.208540  |
| H211 | -5.681384 | 5.817808  | 2.227095  | N17 | -1.086881 | 7.626316  | -2.168790 |
| H212 | 7.381548  | 1.648543  | -4.227629 | C18 | -0.440786 | 8.030846  | -3.403353 |
| H213 | 11.923155 | -0.165729 | -2.088276 | C19 | 2.371500  | 0.225900  | 9.159102  |
| H214 | 8.669194  | 0.692779  | -1.619793 | C20 | 1.298171  | -0.371431 | 8.491882  |
| H215 | 7.795387  | -0.450105 | -2.653004 | C21 | 3.394577  | 0.804039  | 8.401692  |
| H216 | -2.326793 | 6.966871  | -0.004631 | C22 | 1.245491  | -0.411552 | 7.094911  |
| H217 | -1.627508 | -0.203030 | -7.116422 | C23 | 3.354194  | 0.775038  | 7.008297  |
| H218 | -6.374316 | 2.203009  | -4.980151 | C24 | 2.281344  | 0.160845  | 6.348493  |
| H219 | -5.131327 | 3.339852  | -5.528125 | O25 | 2.339710  | 0.121379  | 4.977559  |
| H220 | -2.571266 | -1.472530 | -5.489348 | C26 | 2.483747  | -5.407891 | 6.331868  |
| H221 | 3.033366  | 3.687560  | -4.143686 | C27 | 3.689776  | -4.594026 | 5.865737  |
| H222 | 4.699595  | -2.451968 | 5.721261  | C28 | 3.235739  | -3.337908 | 5.145182  |
| H223 | 3.561314  | -1.521192 | 4.802378  | N29 | 4.077199  | -2.285850 | 5.113689  |
| H224 | 8.248188  | 4.387568  | 1.911542  | O30 | 2.129144  | -3.317155 | 4.586308  |
| H225 | 1.564181  | -1.377475 | -7.911177 | C31 | 8.965086  | 1.964956  | 2.006268  |
| H226 | -2.104063 | 7.713754  | -2.005084 | C32 | 9.096573  | 2.835644  | 0.776275  |
| H227 | -7.659006 | 7.687236  | 0.527219  | O33 | 9.562178  | 2.428074  | -0.288157 |
| H228 | -4.865011 | -1.818233 | 3.383180  | C34 | 7.545944  | 1.894742  | 2.611414  |
| H229 | -6.374673 | -1.452855 | 2.597752  | C35 | 6.435413  | 1.412857  | 1.655414  |
| H230 | -3.991717 | -5.796581 | -2.003797 | C36 | 6.640524  | -0.042638 | 1.210557  |
| H231 | -2.672025 | -8.292107 | -4.310178 | C37 | 5.054421  | 1.596896  | 2.302110  |
| H232 | -0.951984 | -2.053621 | -0.755112 | N38 | 8.680931  | 4.116943  | 0.955420  |
| H233 | -0.356675 | -1.718244 | 3.577096  | C39 | 8.673394  | 5.073530  | -0.120009 |
| H234 | 1.158196  | -2.224102 | 3.654747  | C40 | 8.418877  | 1.863617  | -4.077117 |
| S235 | 0.407932  | -5.788542 | -2.289592 | C41 | 9.292285  | 0.652156  | -3.730275 |
| H236 | 0.127142  | -4.591902 | -1.732818 | C42 | 8.776825  | -0.070027 | -2.483273 |
| H237 | -1.926445 | -5.719194 | 1.516946  | S43 | 9.812282  | -1.470107 | -1.893138 |
| C238 | 1.177252  | 3.261747  | -2.119971 | C44 | 11.282684 | -0.557016 | -1.293100 |
| C239 | 1.739180  | 3.778058  | -0.945012 | C45 | 1.995105  | 3.602836  | -4.550362 |
| H240 | 2.026909  | 4.824876  | -0.910107 | C46 | 1.150940  | 4.241549  | -3.438316 |
| C241 | 1.881847  | 2.976054  | 0.188659  | C47 | -5.423732 | 2.603326  | -4.754943 |
| H242 | 2.308921  | 3.395814  | 1.095358  | C48 | -5.541071 | 3.371500  | -3.431183 |
| C243 | 1.459549  | 1.646262  | 0.166734  | C49 | -5.989482 | 2.435454  | -2.299651 |
| H244 | 1.560306  | 1.037526  | 1.061508  | C50 | -4.223729 | 4.075994  | -3.075743 |
| C245 | 0.757218  | 1.923620  | -2.132221 | C51 | -6.785677 | -0.630977 | 0.212208  |
| H246 | 0.316183  | 1.511380  | -3.036710 | N52 | -5.347989 | -0.738912 | 0.372722  |
| C247 | 0.893717  | 1.121739  | -0.999559 | C53 | -4.719169 | -1.041419 | 1.515976  |
| H248 | 0.011571  | 4.072574  | -3.727722 | N54 | -5.396758 | -1.240757 | 2.673089  |
| H249 | 0.535482  | 0.097487  | -1.031002 | N55 | -3.390669 | -1.099393 | 1.534827  |
|      |           |           |           | C56 | -2.859165 | -1.012912 | -4.591201 |
|      |           |           |           | C57 | -2.236810 | -1.687998 | -3.363009 |
|      |           |           |           | C58 | -2.793336 | -1.198888 | -2.026491 |
|      |           |           |           | O59 | -3.905794 | -0.642783 | -1.987928 |
|      |           |           |           | O60 | -2.091111 | -1.432869 | -0.960411 |
|      |           |           |           | C61 | -0.713315 | -0.466233 | -7.701866 |
|      |           |           |           | C62 | 0.464908  | -0.185814 | -6.793984 |
|      |           |           |           | O63 | 0.388435  | 0.597215  | -5.850058 |
|      |           |           |           | N64 | 1.603549  | -0.850747 | -7.140831 |
|      |           |           |           | C65 | 2.912161  | -0.576979 | -6.574700 |
|      |           |           |           | C66 | 3.579261  | -1.787379 | -5.889259 |
|      |           |           |           | C67 | 3.277339  | -1.987607 | -4.387038 |
|      |           |           |           | C68 | 3.909995  | -0.881613 | -3.527576 |
|      |           |           |           | C69 | 1.777530  | -2.126117 | -4.088837 |
|      |           |           |           | C70 | -0.932535 | -6.567891 | -4.447020 |
|      |           |           |           | C71 | -2.380333 | -6.400924 | -3.991728 |
|      |           |           |           | O72 | -2.847321 | -5.304980 | -3.672676 |

### TS attack at C2:

|     |           |          |           |
|-----|-----------|----------|-----------|
| C1  | -6.307911 | 5.638989 | 1.266003  |
| C2  | -5.875428 | 6.663792 | 0.228754  |
| O3  | -4.764975 | 6.597157 | -0.298005 |
| C4  | -7.774043 | 5.590838 | 1.705421  |
| C5  | -8.054404 | 4.594778 | 2.841460  |
| S6  | -7.713381 | 2.820422 | 2.481466  |
| C7  | -6.044218 | 2.597051 | 3.200809  |
| N8  | -6.759999 | 7.659003 | -0.047874 |
| C9  | -6.442542 | 8.734682 | -0.958388 |
| C10 | -1.251326 | 6.896530 | 0.145036  |
| C11 | -0.387461 | 7.198225 | -1.073738 |
| O12 | 0.840274  | 7.120568 | -1.061913 |

|      |           |           |           |      |           |           |           |
|------|-----------|-----------|-----------|------|-----------|-----------|-----------|
| C73  | 0.012397  | -5.552907 | -3.809160 | H133 | -5.262778 | 1.627494  | -2.156923 |
| N74  | -3.141160 | -7.524727 | -4.034479 | H134 | -4.324253 | 4.679366  | -2.167297 |
| C75  | -4.577610 | -7.516544 | -3.771705 | H135 | -3.900083 | 4.739765  | -3.886429 |
| C76  | -4.970259 | -7.604393 | -2.287709 | H136 | -3.424046 | 3.344547  | -2.907989 |
| O77  | -5.693613 | -8.508304 | -1.879972 | H137 | -4.668322 | 1.812889  | -4.676776 |
| N78  | -4.481034 | -6.608824 | -1.507588 | H138 | -1.147722 | -1.572016 | -3.354817 |
| C79  | -4.901131 | -6.488224 | -0.118493 | H139 | -2.433027 | -2.769225 | -3.393345 |
| C80  | -4.028941 | -5.538158 | 0.708614  | H140 | -2.495990 | 0.012701  | -4.705463 |
| C81  | -2.601361 | -6.073726 | 0.879050  | H141 | -0.670881 | -1.455568 | -8.167797 |
| C82  | -4.704581 | -5.297162 | 2.065370  | H142 | 3.302091  | -2.696253 | -6.441314 |
| C83  | -2.407001 | -5.115908 | 5.613341  | H143 | 4.665749  | -1.684239 | -6.005895 |
| C84  | -1.879396 | -3.677743 | 5.513834  | H144 | 3.764603  | -2.933535 | -4.109191 |
| C85  | -2.647127 | -2.804235 | 4.506659  | H145 | 3.802165  | -1.108478 | -2.461776 |
| O86  | -3.894699 | -2.877851 | 4.480120  | H146 | 3.432787  | 0.089826  | -3.695597 |
| O87  | -1.953256 | -2.027043 | 3.753215  | H147 | 4.981013  | -0.775520 | -3.735937 |
| O88  | 0.553939  | -1.569941 | 3.337591  | H148 | 1.608555  | -2.391869 | -3.039693 |
| H89  | -8.095107 | 6.574986  | 2.079546  | H149 | 1.247016  | -1.188924 | -4.283858 |
| H90  | -8.413207 | 5.348131  | 0.847962  | H150 | 1.320708  | -2.905821 | -4.708280 |
| H91  | -7.490605 | 4.864664  | 3.740969  | H151 | 2.779124  | 0.252143  | -5.876957 |
| H92  | -9.115261 | 4.639247  | 3.104583  | H152 | -0.440413 | -4.562727 | -3.851706 |
| H93  | -6.033759 | 2.910698  | 4.247779  | H153 | 0.959334  | -5.530423 | -4.352093 |
| H94  | -5.826236 | 1.527208  | 3.156880  | H154 | -0.586157 | -7.593762 | -4.276255 |
| H95  | -5.277643 | 3.136310  | 2.641315  | H155 | -4.986514 | -6.595392 | -4.199335 |
| H96  | -6.011043 | 4.664595  | 0.866315  | H156 | -3.975092 | -4.573670 | 0.180194  |
| H97  | -7.192630 | 8.816228  | -1.752451 | H157 | -5.719795 | -4.904410 | 1.938147  |
| H98  | -0.716318 | 4.817608  | 0.296337  | H158 | -4.152033 | -4.581828 | 2.678419  |
| H99  | 0.260157  | 5.873112  | 1.294247  | H159 | -4.783570 | -6.233458 | 2.631728  |
| H100 | -2.689373 | 5.210817  | 1.769737  | H160 | -2.107736 | -6.238309 | -0.083401 |
| H101 | -1.892040 | 3.737146  | 3.621423  | H161 | -2.610094 | -7.028263 | 1.419615  |
| H102 | -1.208875 | 3.211155  | 2.072235  | H162 | -4.893549 | -7.491477 | 0.321204  |
| H103 | -0.212772 | 4.116368  | 3.217697  | H163 | -1.979513 | -3.188643 | 6.492807  |
| H104 | -2.340981 | 6.184074  | 4.059774  | H164 | -0.813524 | -3.667424 | 5.263119  |
| H105 | -2.111877 | 7.402922  | 2.802435  | H165 | -2.256659 | -5.658613 | 4.674123  |
| H106 | -0.707156 | 6.677069  | 3.597655  | H166 | 8.790816  | 2.380092  | -4.968281 |
| H107 | -1.217362 | 7.802568  | 0.765607  | H167 | 10.319841 | 0.991309  | -3.555846 |
| H108 | -0.563639 | 7.283120  | -4.196511 | H168 | 10.970245 | 0.311543  | -0.708430 |
| H109 | 0.487620  | -0.819119 | 9.060049  | H169 | 11.848547 | -1.243605 | -0.659166 |
| H110 | 4.233024  | 1.285360  | 8.897565  | H170 | -7.305941 | -1.565747 | 0.463569  |
| H111 | 0.411077  | -0.887355 | 6.586817  | H171 | -7.210353 | 0.182637  | 0.812686  |
| H112 | 4.141329  | 1.229815  | 6.414541  | H172 | -6.983633 | -0.411071 | -0.837079 |
| H113 | 1.541637  | -0.274174 | 4.567504  | H173 | -2.899121 | -1.368985 | 2.402646  |
| H114 | 4.300919  | -5.178834 | 5.165295  | C174 | 0.142357  | -2.795945 | 1.460033  |
| H115 | 4.345717  | -4.330958 | 6.703720  | C175 | 0.661003  | -1.842333 | 0.477835  |
| H116 | 1.847595  | -5.670940 | 5.485818  | O176 | -0.024872 | -2.654350 | -0.498189 |
| H117 | 7.263396  | 2.879378  | 3.010487  | C177 | 2.162481  | -2.064498 | 0.423906  |
| H118 | 7.581405  | 1.229847  | 3.485315  | C178 | 1.081714  | -3.946827 | 1.606797  |
| H119 | 6.466731  | 2.048069  | 0.758465  | C179 | 2.329700  | -3.568551 | 0.759448  |
| H120 | 5.834354  | -0.357602 | 0.539879  | H180 | 0.295354  | -0.820884 | 0.518305  |
| H121 | 6.633896  | -0.718511 | 2.075378  | H181 | 2.579031  | -1.787699 | -0.547331 |
| H122 | 7.583746  | -0.189868 | 0.676773  | H182 | 3.258645  | -3.765911 | 1.299654  |
| H123 | 4.894345  | 2.633717  | 2.618842  | H183 | 2.626869  | -1.432979 | 1.188419  |
| H124 | 4.251491  | 1.340707  | 1.603373  | H184 | 2.348313  | -4.162338 | -0.156966 |
| H125 | 4.938926  | 0.960660  | 3.188473  | H185 | 1.314865  | -4.075313 | 2.668432  |
| H126 | 9.310527  | 0.968703  | 1.722614  | H186 | 0.599076  | -4.875544 | 1.284362  |
| H127 | 7.658255  | 5.277185  | -0.482648 | H187 | -0.883660 | -2.786854 | 1.807147  |
| H128 | 1.533627  | 5.236981  | -3.190874 | H188 | 2.027966  | 4.249679  | -5.435028 |
| H129 | 1.590470  | 2.635671  | -4.862696 | H189 | 8.410549  | 2.580109  | -3.249118 |
| H130 | -6.312413 | 4.146566  | -3.558607 | H190 | 9.332382  | -0.049343 | -4.572197 |
| H131 | -6.089721 | 2.974392  | -1.350558 | H191 | 9.124997  | 6.020245  | 0.194670  |
| H132 | -6.960303 | 1.978485  | -2.527165 | H192 | 9.258629  | 4.655985  | -0.939128 |

|      |           |           |           |
|------|-----------|-----------|-----------|
| H193 | 9.660742  | 2.336184  | 2.770493  |
| H194 | 2.403320  | 0.249240  | 10.243372 |
| H195 | 2.809297  | -6.328692 | 6.824321  |
| H196 | 1.876567  | -4.838518 | 7.040826  |
| H197 | -1.895342 | -5.668938 | 6.407536  |
| H198 | -3.478988 | -5.106367 | 5.823409  |
| H199 | -5.946411 | -6.147756 | -0.081464 |
| H200 | -5.031827 | -8.373428 | -4.269920 |
| H201 | -0.925135 | -6.414985 | -5.535749 |
| H202 | 3.566237  | -0.216037 | -7.379358 |
| H203 | -0.736582 | 0.284629  | -8.499712 |
| H204 | -3.946585 | -0.983302 | -4.494013 |
| H205 | -2.886354 | -1.078675 | 0.639913  |
| H206 | -4.760097 | -0.624436 | -0.475504 |
| H207 | -0.842743 | 8.986411  | -3.757013 |
| H208 | 0.623323  | 8.142112  | -3.192723 |
| H209 | -6.378234 | 9.697803  | -0.438214 |
| H210 | -5.474266 | 8.509811  | -1.404661 |
| H211 | -5.662244 | 5.812376  | 2.137899  |
| H212 | 7.381735  | 1.567173  | -4.273276 |
| H213 | 11.922292 | -0.233799 | -2.117944 |
| H214 | 8.672209  | 0.638373  | -1.656767 |
| H215 | 7.793117  | -0.513392 | -2.675746 |
| H216 | -2.300800 | 6.759798  | -0.139915 |
| H217 | -1.636283 | -0.374526 | -7.131020 |
| H218 | -6.373402 | 2.128471  | -5.027304 |
| H219 | -5.132214 | 3.265967  | -5.577970 |
| H220 | -2.605500 | -1.568961 | -5.498616 |
| H221 | 3.026297  | 3.448980  | -4.212623 |
| H222 | 4.890907  | -2.270037 | 5.708417  |
| H223 | 3.705423  | -1.394158 | 4.790992  |
| H224 | 8.260484  | 4.370368  | 1.835859  |
| H225 | 1.565308  | -1.448596 | -7.952913 |
| H226 | -2.094191 | 7.576658  | -2.134790 |
| H227 | -7.653567 | 7.663950  | 0.416500  |
| H228 | -4.892358 | -1.772863 | 3.407225  |
| H229 | -6.389933 | -1.400820 | 2.607288  |
| H230 | -3.991445 | -5.843554 | -1.961641 |
| H231 | -2.688408 | -8.415786 | -4.171337 |
| H232 | -0.951100 | -2.159975 | -0.780371 |
| H233 | -0.391598 | -1.724512 | 3.657548  |
| H234 | 1.127864  | -2.205125 | 3.823901  |
| S235 | 0.370029  | -5.945512 | -2.036224 |
| H236 | 0.117713  | -4.720056 | -1.531345 |
| H237 | -1.992623 | -5.370801 | 1.458407  |
| C238 | 1.119676  | 3.395627  | -2.185703 |
| C239 | 1.728993  | 3.826713  | -1.001386 |
| H240 | 2.183618  | 4.812305  | -0.966373 |
| C241 | 1.706609  | 3.026397  | 0.143086  |
| H242 | 2.171319  | 3.382433  | 1.058564  |
| C243 | 1.058380  | 1.791051  | 0.123826  |
| H244 | 1.024976  | 1.185700  | 1.026086  |
| C245 | 0.485241  | 2.145439  | -2.199060 |
| H246 | 0.029346  | 1.788634  | -3.119199 |
| C247 | 0.442902  | 1.354334  | -1.053702 |
| H248 | 0.126065  | 4.383412  | -3.806512 |
| H249 | -0.094756 | 0.412088  | -1.085815 |

## 4.7 Mutant S3

The following atoms were kept fixed in the geometry optimizations of reactant and transition state structures: 1, 6, 7, 15, 16, 23, 28, 36, 37, 42, 44, 48, 53, 58, 62, 72, 76, 80.

### Reactant:

|     |           |           |           |      |           |           |           |
|-----|-----------|-----------|-----------|------|-----------|-----------|-----------|
| C1  | -5.292504 | 6.821363  | 1.827821  | N51  | -5.606817 | -0.342223 | 3.061448  |
| C2  | -4.773852 | 7.715610  | 0.702270  | N52  | -3.590755 | -0.117111 | 1.983598  |
| O3  | -3.832627 | 7.394619  | -0.020768 | C53  | -3.432106 | -0.200590 | -4.310547 |
| C4  | -5.098490 | 5.339134  | 1.519701  | C54  | -2.861573 | -0.966387 | -3.116097 |
| N5  | -5.413656 | 8.914476  | 0.593388  | C55  | -3.256287 | -0.364897 | -1.783228 |
| C6  | -5.003727 | 9.941923  | -0.346591 | O56  | -4.124173 | 0.486438  | -1.652138 |
| C7  | -0.167224 | 7.189265  | 0.412476  | O57  | -2.636175 | -0.828210 | -0.691354 |
| C8  | 0.642780  | 7.314300  | -0.875597 | C58  | -1.409008 | 0.028444  | -7.540775 |
| O9  | 1.802859  | 6.920305  | -0.984317 | C59  | -0.177918 | -0.020123 | -6.657995 |
| C10 | 0.388959  | 6.127911  | 1.363653  | O60  | -0.105927 | 0.592928  | -5.594199 |
| C11 | -0.389812 | 5.965752  | 2.682777  | N61  | 0.844601  | -0.760264 | -7.170323 |
| C12 | 0.156558  | 4.767168  | 3.473255  | C62  | 2.198471  | -0.747945 | -6.640679 |
| C13 | -0.369908 | 7.233943  | 3.550045  | C63  | 2.738367  | -2.133919 | -6.231119 |
| N14 | -0.007396 | 7.961027  | -1.889314 | C64  | 2.488200  | -2.567275 | -4.769295 |
| C15 | 0.623244  | 8.242836  | -3.165213 | C65  | 3.314494  | -1.738677 | -3.773106 |
| C16 | 2.731222  | -0.221113 | 9.105053  | C66  | 1.000806  | -2.556004 | -4.390492 |
| C17 | 1.541552  | -0.572020 | 8.462070  | C67  | -2.567993 | -6.064012 | -4.510456 |
| C18 | 3.832665  | 0.156252  | 8.332490  | C68  | -3.892543 | -5.628242 | -3.891036 |
| C19 | 1.447158  | -0.561474 | 7.069652  | O69  | -4.103853 | -4.468361 | -3.524763 |
| C20 | 3.752475  | 0.174790  | 6.941262  | C70  | -1.371319 | -5.321293 | -3.928050 |
| C21 | 2.558722  | -0.187464 | 6.300514  | N71  | -4.848912 | -6.588323 | -3.838022 |
| O22 | 2.548245  | -0.196193 | 4.937835  | C72  | -6.230152 | -6.314341 | -3.465059 |
| C23 | 1.672869  | -5.719846 | 6.208627  | C73  | -6.547994 | -6.360617 | -1.961674 |
| C24 | 2.835162  | -5.317944 | 5.291001  | O74  | -7.458303 | -7.067828 | -1.541864 |
| C25 | 2.572428  | -3.953018 | 4.675049  | N75  | -5.791454 | -5.544062 | -1.183029 |
| N26 | 3.504024  | -2.997416 | 4.871096  | C76  | -6.151024 | -5.328588 | 0.213269  |
| O27 | 1.535657  | -3.755377 | 4.023735  | C77  | -5.013729 | -4.802236 | 1.092243  |
| C28 | 9.098964  | 0.486097  | 1.580796  | C78  | -3.867811 | -5.814311 | 1.212866  |
| C29 | 9.294902  | 1.343403  | 0.349823  | C79  | -5.594083 | -4.432554 | 2.464785  |
| O30 | 9.582944  | 0.881113  | -0.754494 | C80  | -3.121270 | -4.550497 | 5.796548  |
| C31 | 7.730520  | 0.645706  | 2.277375  | C81  | -2.341396 | -3.245640 | 5.583571  |
| C32 | 6.497869  | 0.349933  | 1.399467  | C82  | -3.021452 | -2.252109 | 4.628226  |
| C33 | 6.430879  | -1.122152 | 0.966549  | O83  | -4.274772 | -2.155237 | 4.664389  |
| C34 | 5.209104  | 0.766118  | 2.123252  | O84  | -2.262703 | -1.566564 | 3.859760  |
| N35 | 9.152164  | 2.676591  | 0.575211  | O85  | 0.448855  | -1.218885 | 3.759814  |
| C36 | 9.241498  | 3.644893  | -0.485858 | H86  | -5.719829 | 5.038488  | 0.675021  |
| C37 | 8.188341  | 0.621814  | -4.458122 | H87  | -4.054818 | 5.150590  | 1.266802  |
| C38 | 8.987387  | -0.663230 | -4.212069 | H88  | -4.728586 | 7.081837  | 2.733559  |
| C39 | 8.454631  | -1.434462 | -3.002273 | H89  | -5.844286 | 10.256392 | -0.973669 |
| S40 | 9.392288  | -2.952876 | -2.560532 | H90  | 0.401641  | 5.163851  | 0.842657  |
| C41 | 10.950176 | -2.207739 | -1.949403 | H91  | 1.437980  | 6.363624  | 1.581651  |
| C42 | 2.160394  | 3.480918  | -4.513459 | H92  | -1.439131 | 5.747847  | 2.430764  |
| C43 | 1.302166  | 3.916486  | -3.315381 | H93  | -0.420260 | 4.595778  | 4.388233  |
| C44 | -5.316910 | 3.815259  | -4.272305 | H94  | 0.124086  | 3.848315  | 2.878585  |
| C45 | -5.342658 | 4.514654  | -2.910980 | H95  | 1.200171  | 4.936940  | 3.765623  |
| C46 | -6.309964 | 3.787214  | -1.967846 | H96  | -0.904136 | 7.069915  | 4.492237  |
| C47 | -3.931707 | 4.604442  | -2.312991 | H97  | -0.840190 | 8.086814  | 3.049970  |
| C48 | -6.939891 | 0.760653  | 0.730044  | H98  | 0.659778  | 7.519434  | 3.799115  |
| N49 | -5.498949 | 0.680315  | 0.938957  | H99  | -0.149575 | 8.179471  | 0.888550  |
| C50 | -4.910440 | 0.052017  | 1.989424  | H100 | 0.246148  | 7.591799  | -3.963538 |
|     |           |           |           | H101 | 0.673645  | -0.862912 | 9.047870  |



|      |           |           |           |      |           |           |           |
|------|-----------|-----------|-----------|------|-----------|-----------|-----------|
| H102 | 4.763519  | 0.440949  | 8.815920  | H162 | -7.416051 | -0.226657 | 0.662628  |
| H103 | 0.527701  | -0.846895 | 6.568002  | H163 | -7.421738 | 1.334411  | 1.529757  |
| H104 | 4.600539  | 0.473255  | 6.332234  | H164 | -7.111735 | 1.292439  | -0.205549 |
| H105 | 1.645126  | -0.437267 | 4.571358  | H165 | -3.113233 | -0.637005 | 2.760907  |
| H106 | 2.922145  | -6.035434 | 4.466991  | C166 | -0.905751 | -3.162671 | 1.015763  |
| H107 | 3.786473  | -5.330969 | 5.833983  | C167 | 0.077166  | -2.145479 | 0.652742  |
| H108 | 0.732806  | -5.699296 | 5.653429  | O168 | -0.803330 | -2.714593 | -0.389947 |
| H109 | 7.637316  | 1.663576  | 2.681962  | C169 | 1.462028  | -2.748807 | 0.660443  |
| H110 | 7.714970  | -0.015274 | 3.154609  | C170 | -0.189577 | -4.469616 | 1.279118  |
| H111 | 6.578692  | 0.964552  | 0.491006  | C171 | 1.213186  | -4.277445 | 0.648023  |
| H112 | 5.547541  | -1.300193 | 0.344743  | H172 | -0.085660 | -1.090468 | 0.842528  |
| H113 | 6.357268  | -1.781944 | 1.840279  | H173 | 2.085099  | -2.404226 | -0.170973 |
| H114 | 7.305809  | -1.427960 | 0.385357  | H174 | 1.982029  | -4.819889 | 1.202492  |
| H115 | 5.237844  | 1.821761  | 2.416244  | H175 | 1.938649  | -2.436477 | 1.594976  |
| H116 | 4.335805  | 0.628657  | 1.478374  | H176 | 1.221301  | -4.650999 | -0.378594 |
| H117 | 5.042387  | 0.176967  | 3.032913  | H177 | -0.103950 | -4.581500 | 2.365378  |
| H118 | 9.253637  | -0.548997 | 1.269630  | H178 | -0.723774 | -5.341219 | 0.889348  |
| H119 | 8.262607  | 4.073049  | -0.734657 | H179 | -1.841319 | -2.909731 | 1.505659  |
| H120 | 1.598882  | 4.918139  | -2.986846 | H180 | 2.105467  | 4.219584  | -5.321254 |
| H121 | 1.816603  | 2.523694  | -4.916322 | H181 | 8.243487  | 1.281538  | -3.585853 |
| H122 | -5.715926 | 5.538715  | -3.060434 | H182 | 8.963433  | -1.308217 | -5.098794 |
| H123 | -6.401710 | 4.303370  | -1.007033 | H183 | 9.918839  | 4.462666  | -0.216849 |
| H124 | -7.313737 | 3.715113  | -2.402500 | H184 | 9.633184  | 3.134788  | -1.365800 |
| H125 | -5.948106 | 2.769914  | -1.774277 | H185 | 9.895456  | 0.723914  | 2.298485  |
| H126 | -3.914180 | 5.209597  | -1.402253 | H186 | 2.795803  | -0.233601 | 10.188559 |
| H127 | -3.235049 | 5.064944  | -3.022703 | H187 | 1.822944  | -6.727980 | 6.605338  |
| H128 | -3.549409 | 3.604302  | -2.075603 | H188 | 1.583066  | -5.031899 | 7.055150  |
| H129 | -4.948056 | 2.787870  | -4.169155 | H189 | -2.641627 | -5.173572 | 6.558427  |
| H130 | -1.767412 | -1.013896 | -3.167986 | H190 | -4.143565 | -4.330442 | 6.112527  |
| H131 | -3.215887 | -2.007825 | -3.114378 | H191 | -6.999944 | -4.630139 | 0.267034  |
| H132 | -2.933919 | 0.764214  | -4.431011 | H192 | -6.877410 | -7.051908 | -3.940794 |
| H133 | -1.584623 | -0.913733 | -8.069601 | H193 | -2.633757 | -5.840838 | -5.584994 |
| H134 | 2.318386  | -2.886761 | -6.912478 | H194 | 2.861083  | -0.313244 | -7.400502 |
| H135 | 3.821440  | -2.140391 | -6.406822 | H195 | -1.286618 | 0.817776  | -8.291241 |
| H136 | 2.842600  | -3.605719 | -4.699449 | H196 | -4.502731 | -0.027271 | -4.181028 |
| H137 | 3.208378  | -2.137485 | -2.758626 | H197 | -3.103514 | -0.038087 | 1.099609  |
| H138 | 2.990903  | -0.692657 | -3.739623 | H198 | -4.925348 | 0.748999  | 0.094576  |
| H139 | 4.380667  | -1.755669 | -4.025701 | H199 | 0.459748  | 9.285707  | -3.457119 |
| H140 | 0.855859  | -2.966096 | -3.385022 | H200 | 1.692615  | 8.065243  | -3.048074 |
| H141 | 0.598065  | -1.538015 | -4.400091 | H201 | -4.599331 | 10.820280 | 0.168761  |
| H142 | 0.408400  | -3.156764 | -5.088934 | H202 | -4.227952 | 9.512649  | -0.980377 |
| H143 | 2.191450  | -0.059150 | -5.794177 | H203 | -6.345925 | 7.037979  | 2.039872  |
| H144 | -1.589432 | -4.254230 | -3.902171 | H204 | 7.130206  | 0.405547  | -4.647169 |
| H145 | -0.488197 | -5.483293 | -4.548861 | H205 | 11.587778 | -1.871924 | -2.770880 |
| H146 | -2.436634 | -7.148855 | -4.425934 | H206 | 8.433799  | -0.785270 | -2.122416 |
| H147 | -6.485316 | -5.320021 | -3.846962 | H207 | 7.432785  | -1.784040 | -3.189477 |
| H148 | -4.619416 | -3.882733 | 0.630303  | H208 | -1.219665 | 6.989592  | 0.174562  |
| H149 | -6.453883 | -3.760509 | 2.359399  | H209 | -2.279628 | 0.272210  | -6.934687 |
| H150 | -4.871150 | -3.920828 | 3.102709  | H210 | -6.315765 | 3.768561  | -4.720704 |
| H151 | -5.941600 | -5.329156 | 2.992201  | H211 | -4.657772 | 4.335130  | -4.976710 |
| H152 | -3.438117 | -6.058968 | 0.236372  | H212 | -3.284262 | -0.779902 | -5.224922 |
| H153 | -4.226318 | -6.747113 | 1.664729  | H213 | 3.211469  | 3.375234  | -4.224789 |
| H154 | -6.518467 | -6.283925 | 0.599988  | H214 | 4.254536  | -3.153606 | 5.525257  |
| H155 | -2.234741 | -2.726184 | 6.546426  | H215 | 3.281591  | -2.027277 | 4.643322  |
| H156 | -1.327013 | -3.442227 | 5.222395  | H216 | 8.858879  | 2.981791  | 1.490161  |
| H157 | -3.177511 | -5.134617 | 4.871925  | H217 | 0.703505  | -1.192868 | -8.071457 |
| H158 | 8.574923  | 1.171120  | -5.323174 | H218 | -0.985634 | 8.176262  | -1.764581 |
| H159 | 10.038368 | -0.403054 | -4.041898 | H219 | -6.166140 | 9.117324  | 1.233669  |
| H160 | 10.728061 | -1.365223 | -1.290139 | H220 | -5.134182 | -0.989030 | 3.739913  |
| H161 | 11.477829 | -2.983840 | -1.390208 | H221 | -6.608690 | -0.252308 | 3.070974  |

|      |           |           |           |
|------|-----------|-----------|-----------|
| H222 | -5.168754 | -4.892638 | -1.650628 |
| H223 | -4.593248 | -7.542018 | -4.044238 |
| H224 | -1.966873 | -1.561600 | -0.808628 |
| H225 | -0.528620 | -1.274887 | 3.893538  |
| H226 | 0.766938  | -2.144319 | 3.799880  |
| S227 | -0.992070 | -5.876426 | -2.206656 |
| H228 | -0.885462 | -4.651265 | -1.652951 |
| H229 | -3.068096 | -5.424757 | 1.850683  |
| C230 | 1.400868  | 2.966366  | -2.139740 |
| C231 | 1.923178  | 3.398037  | -0.913582 |
| H232 | 2.237300  | 4.433065  | -0.805348 |
| C233 | 2.020276  | 2.520885  | 0.169939  |
| H234 | 2.419913  | 2.875057  | 1.116067  |
| C235 | 1.605036  | 1.195001  | 0.041823  |
| H236 | 1.679682  | 0.520129  | 0.890258  |
| C237 | 0.983664  | 1.631826  | -2.260202 |
| H238 | 0.574038  | 1.280989  | -3.204634 |
| C239 | 1.089506  | 0.754456  | -1.180901 |
| H240 | 0.254969  | 3.987648  | -3.639756 |
| H241 | 0.763583  | -0.275283 | -1.297628 |
| S242 | -5.578851 | 4.326726  | 2.986787  |
| H243 | -5.217186 | 3.139196  | 2.458931  |

|     |           |           |           |
|-----|-----------|-----------|-----------|
| C34 | 5.213793  | 0.633517  | 2.101346  |
| N35 | 9.177303  | 2.552498  | 0.572017  |
| C36 | 9.259906  | 3.540228  | -0.472071 |
| C37 | 8.162960  | 0.603095  | -4.496619 |
| C38 | 8.914455  | -0.713018 | -4.265630 |
| C39 | 8.348537  | -1.479898 | -3.068239 |
| S40 | 9.227152  | -3.036949 | -2.639419 |
| C41 | 10.811000 | -2.359138 | -2.016628 |
| C42 | 2.159740  | 3.514157  | -4.469252 |
| C43 | 1.322868  | 4.004121  | -3.277363 |
| C44 | -5.313248 | 3.907708  | -4.187124 |
| C45 | -5.296409 | 4.488251  | -2.769211 |
| C46 | -6.304040 | 3.741670  | -1.883759 |
| C47 | -3.882450 | 4.437951  | -2.172236 |
| C48 | -6.940197 | 0.771594  | 0.763230  |
| N49 | -5.504411 | 0.572626  | 0.857716  |
| C50 | -4.887205 | -0.007440 | 1.905499  |
| N51 | -5.540114 | -0.285853 | 3.049507  |
| N52 | -3.582678 | -0.257268 | 1.830467  |
| C53 | -3.463381 | -0.122630 | -4.311040 |
| C54 | -2.874990 | -0.885091 | -3.117491 |
| C55 | -3.224183 | -0.305476 | -1.745079 |
| O56 | -4.170848 | 0.493484  | -1.622614 |
| O57 | -2.525161 | -0.719060 | -0.733137 |
| C58 | -1.452821 | 0.151087  | -7.545616 |
| C59 | -0.184303 | 0.162140  | -6.717785 |
| O60 | -0.048223 | 0.884151  | -5.732094 |
| N61 | 0.788461  | -0.674923 | -7.176031 |
| C62 | 2.151801  | -0.673250 | -6.677273 |
| C63 | 2.643069  | -2.039740 | -6.157811 |
| C64 | 2.351146  | -2.366340 | -4.675571 |
| C65 | 3.192841  | -1.503531 | -3.722484 |
| C66 | 0.860641  | -2.276130 | -4.320674 |
| C67 | -2.617481 | -6.069813 | -4.527633 |
| C68 | -3.942132 | -5.605225 | -3.928992 |
| O69 | -4.126566 | -4.451630 | -3.534651 |
| C70 | -1.424679 | -5.226407 | -4.089561 |
| N71 | -4.931190 | -6.536286 | -3.930172 |
| C72 | -6.310313 | -6.227348 | -3.569921 |
| C73 | -6.632287 | -6.300674 | -2.068721 |
| O74 | -7.516849 | -7.042032 | -1.651997 |
| N75 | -5.887834 | -5.478578 | -1.285206 |
| C76 | -6.206255 | -5.313121 | 0.126216  |
| C77 | -5.037193 | -4.813321 | 0.980592  |
| C78 | -3.878763 | -5.818312 | 1.012759  |
| C79 | -5.559309 | -4.502407 | 2.389930  |
| C80 | -3.145000 | -4.668311 | 5.709294  |
| C81 | -2.312093 | -3.395810 | 5.504020  |
| C82 | -2.971848 | -2.356930 | 4.581256  |
| O83 | -4.213399 | -2.213998 | 4.636035  |
| O84 | -2.200245 | -1.673680 | 3.813957  |
| O85 | 0.335018  | -1.536611 | 3.361667  |
| H86 | -5.335085 | 4.965456  | 0.818606  |
| H87 | -3.781385 | 5.243587  | 1.621968  |
| H88 | -4.820739 | 7.129528  | 2.930408  |
| H89 | -5.746821 | 10.248060 | -0.813228 |
| H90 | 0.473637  | 5.118370  | 0.920977  |
| H91 | 1.501546  | 6.309073  | 1.686683  |
| H92 | -1.375516 | 5.672753  | 2.520337  |
| H93 | -0.362959 | 4.464511  | 4.450166  |

**TS attack at C1:**

|     |           |           |           |
|-----|-----------|-----------|-----------|
| C1  | -5.235652 | 6.795804  | 1.969309  |
| C2  | -4.674371 | 7.720152  | 0.886911  |
| O3  | -3.684623 | 7.438032  | 0.215047  |
| C4  | -4.862398 | 5.336258  | 1.728969  |
| N5  | -5.348991 | 8.898233  | 0.755527  |
| C6  | -4.929649 | 9.954960  | -0.146217 |
| C7  | -0.113755 | 7.146992  | 0.537564  |
| C8  | 0.703434  | 7.320837  | -0.739499 |
| O9  | 1.878986  | 6.971631  | -0.840909 |
| C10 | 0.454539  | 6.069283  | 1.464281  |
| C11 | -0.324855 | 5.875516  | 2.778992  |
| C12 | 0.212623  | 4.652998  | 3.537485  |
| C13 | -0.295000 | 7.120774  | 3.678199  |
| N14 | 0.039012  | 7.952045  | -1.753236 |
| C15 | 0.669801  | 8.262272  | -3.022900 |
| C16 | 2.759370  | -0.453441 | 9.073028  |
| C17 | 1.531282  | -0.748895 | 8.473904  |
| C18 | 3.846696  | -0.135640 | 8.254040  |
| C19 | 1.384316  | -0.744857 | 7.083372  |
| C20 | 3.714715  | -0.124351 | 6.866110  |
| C21 | 2.483083  | -0.434897 | 6.273749  |
| O22 | 2.442863  | -0.454032 | 4.902707  |
| C23 | 1.640655  | -5.886294 | 6.076692  |
| C24 | 2.821193  | -5.491506 | 5.180912  |
| C25 | 2.583914  | -4.109849 | 4.601401  |
| N26 | 3.547491  | -3.183535 | 4.773048  |
| O27 | 1.525968  | -3.871057 | 3.997353  |
| C28 | 9.099328  | 0.343664  | 1.534309  |
| C29 | 9.290657  | 1.221944  | 0.317371  |
| O30 | 9.544838  | 0.775754  | -0.801537 |
| C31 | 7.732851  | 0.497718  | 2.236228  |
| C32 | 6.495860  | 0.243322  | 1.351620  |
| C33 | 6.419275  | -1.208874 | 0.857776  |

|      |           |           |           |      |           |           |           |
|------|-----------|-----------|-----------|------|-----------|-----------|-----------|
| H94  | 0.169887  | 3.750391  | 2.919218  | H154 | -6.559109 | -6.282621 | 0.491546  |
| H95  | 1.258863  | 4.806018  | 3.830667  | H155 | -2.163536 | -2.899255 | 6.473542  |
| H96  | -0.836397 | 6.940963  | 4.613506  | H156 | -1.313745 | -3.632419 | 5.120846  |
| H97  | -0.752126 | 7.991281  | 3.197057  | H157 | -3.243677 | -5.232167 | 4.776069  |
| H98  | 0.737042  | 7.387218  | 3.938641  | H158 | 8.569528  | 1.147422  | -5.355577 |
| H99  | -0.112871 | 8.123653  | 1.040840  | H159 | 9.973471  | -0.492911 | -4.088567 |
| H100 | 0.319860  | 7.604296  | -3.827826 | H160 | 10.620009 | -1.509197 | -1.357120 |
| H101 | 0.670711  | -0.990287 | 9.091493  | H161 | 11.302006 | -3.157588 | -1.455487 |
| H102 | 4.808178  | 0.109074  | 8.697089  | H162 | -7.503693 | -0.168446 | 0.843600  |
| H103 | 0.427072  | -0.982780 | 6.627225  | H163 | -7.303189 | 1.467586  | 1.529435  |
| H104 | 4.552957  | 0.131405  | 6.225059  | H164 | -7.151900 | 1.211799  | -0.211170 |
| H105 | 1.548583  | -0.645804 | 4.535890  | H165 | -3.106291 | -0.728593 | 2.618139  |
| H106 | 2.901474  | -6.190990 | 4.340761  | C166 | -0.879859 | -2.858254 | 0.970390  |
| H107 | 3.767483  | -5.534024 | 5.730708  | C167 | 0.144383  | -1.814760 | 1.140689  |
| H108 | 0.708054  | -5.837274 | 5.511628  | O168 | -0.831148 | -2.438221 | -0.413387 |
| H109 | 7.652366  | 1.504633  | 2.669664  | C169 | 1.506338  | -2.382798 | 0.873749  |
| H110 | 7.710416  | -0.189090 | 3.093460  | C170 | -0.159617 | -4.186083 | 1.142347  |
| H111 | 6.574163  | 0.895903  | 0.470236  | C171 | 1.275049  | -3.900966 | 0.634853  |
| H112 | 5.530746  | -1.357483 | 0.235489  | H172 | -0.104923 | -0.763684 | 1.138677  |
| H113 | 6.350916  | -1.904649 | 1.703882  | H173 | 1.979023  | -1.874557 | 0.028146  |
| H114 | 7.287832  | -1.493872 | 0.257289  | H174 | 2.014751  | -4.507909 | 1.160137  |
| H115 | 5.255614  | 1.670043  | 2.454562  | H175 | 2.133180  | -2.186718 | 1.746979  |
| H116 | 4.335857  | 0.545505  | 1.453924  | H176 | 1.349564  | -4.124103 | -0.431236 |
| H117 | 5.049478  | -0.006374 | 2.977093  | H177 | -0.146242 | -4.440530 | 2.206499  |
| H118 | 9.248587  | -0.686447 | 1.204824  | H178 | -0.657068 | -4.995718 | 0.602839  |
| H119 | 8.279860  | 3.973837  | -0.706479 | H179 | -1.852408 | -2.731903 | 1.443639  |
| H120 | 1.649389  | 5.004888  | -2.975075 | H180 | 2.122619  | 4.235989  | -5.293247 |
| H121 | 1.781133  | 2.560568  | -4.848688 | H181 | 8.242410  | 1.250684  | -3.617171 |
| H122 | -5.606629 | 5.542350  | -2.829179 | H182 | 8.870387  | -1.344922 | -5.160893 |
| H123 | -6.341897 | 4.158494  | -0.871278 | H183 | 9.939820  | 4.351666  | -0.191650 |
| H124 | -7.316880 | 3.791410  | -2.300480 | H184 | 9.644881  | 3.046736  | -1.364337 |
| H125 | -6.017326 | 2.686715  | -1.804927 | H185 | 9.897149  | 0.566385  | 2.255092  |
| H126 | -3.823089 | 4.984476  | -1.225718 | H186 | 2.862336  | -0.461227 | 10.153043 |
| H127 | -3.153042 | 4.890914  | -2.853450 | H187 | 1.766993  | -6.904112 | 6.456051  |
| H128 | -3.576429 | 3.400432  | -1.995164 | H188 | 1.555115  | -5.212961 | 6.935210  |
| H129 | -5.001289 | 2.856897  | -4.175929 | H189 | -2.681708 | -5.325816 | 6.452149  |
| H130 | -1.784192 | -0.950703 | -3.195053 | H190 | -4.150609 | -4.407286 | 6.046313  |
| H131 | -3.242791 | -1.921362 | -3.115538 | H191 | -7.052565 | -4.617762 | 0.232636  |
| H132 | -2.961652 | 0.839187  | -4.449663 | H192 | -6.972586 | -6.935924 | -4.068303 |
| H133 | -1.628112 | -0.806510 | -8.044963 | H193 | -2.720421 | -5.993765 | -5.620212 |
| H134 | 2.219685  | -2.828010 | -6.796130 | H194 | 2.815675  | -0.340088 | -7.486383 |
| H135 | 3.729423  | -2.084285 | -6.307423 | H195 | -1.387483 | 0.929993  | -8.313596 |
| H136 | 2.666411  | -3.409889 | -4.531492 | H196 | -4.528145 | 0.065540  | -4.154612 |
| H137 | 3.050871  | -1.825146 | -2.685144 | H197 | -3.139989 | -0.260423 | 0.902960  |
| H138 | 2.910282  | -0.446328 | -3.768219 | H198 | -4.958091 | 0.639575  | -0.019998 |
| H139 | 4.262066  | -1.580151 | -3.950900 | H199 | 0.474096  | 9.300999  | -3.310022 |
| H140 | 0.685525  | -2.630486 | -3.299320 | H200 | 1.743249  | 8.118583  | -2.897991 |
| H141 | 0.500232  | -1.244935 | -4.385182 | H201 | -4.585916 | 10.840025 | 0.401568  |
| H142 | 0.252855  | -2.886580 | -4.997207 | H202 | -4.104785 | 9.566139  | -0.743118 |
| H143 | 2.194819  | 0.088550  | -5.896689 | H203 | -6.323737 | 6.909050  | 2.041363  |
| H144 | -1.658843 | -4.168216 | -4.198513 | H204 | 7.097735  | 0.428028  | -4.687993 |
| H145 | -0.560596 | -5.455984 | -4.716395 | H205 | 11.467557 | -2.049244 | -2.833103 |
| H146 | -2.448355 | -7.129726 | -4.305462 | H206 | 8.345926  | -0.840580 | -2.180983 |
| H147 | -6.528518 | -5.217792 | -3.933210 | H207 | 7.315862  | -1.790117 | -3.265190 |
| H148 | -4.668749 | -3.873368 | 0.539962  | H208 | -1.162956 | 6.939715  | 0.293092  |
| H149 | -6.407543 | -3.809593 | 2.353863  | H209 | -2.298974 | 0.387062  | -6.901879 |
| H150 | -4.798939 | -4.039577 | 3.021655  | H210 | -6.315198 | 3.954781  | -4.629717 |
| H151 | -5.902475 | -5.418438 | 2.886512  | H211 | -4.629189 | 4.450687  | -4.849079 |
| H152 | -3.486646 | -6.018688 | 0.010929  | H212 | -3.345607 | -0.708470 | -5.227353 |
| H153 | -4.208338 | -6.772946 | 1.440646  | H213 | 3.208881  | 3.383956  | -4.183047 |

|      |           |           |           |     |           |           |           |
|------|-----------|-----------|-----------|-----|-----------|-----------|-----------|
| H214 | 4.325392  | -3.373269 | 5.385089  | N26 | 3.551441  | -3.192043 | 4.708284  |
| H215 | 3.325400  | -2.206317 | 4.582312  | O27 | 1.367103  | -3.730052 | 4.435089  |
| H216 | 8.913273  | 2.845028  | 1.499962  | C28 | 9.104952  | 0.083760  | 1.533295  |
| H217 | 0.599356  | -1.201459 | -8.016026 | C29 | 9.313964  | 0.967264  | 0.322928  |
| H218 | -0.948675 | 8.125380  | -1.636718 | O30 | 9.536794  | 0.524029  | -0.803763 |
| H219 | -6.147623 | 9.060289  | 1.350004  | C31 | 7.739905  | 0.259546  | 2.232426  |
| H220 | -5.085043 | -0.946849 | 3.709399  | C32 | 6.500900  | 0.007542  | 1.350350  |
| H221 | -6.541585 | -0.192058 | 3.078239  | C33 | 6.408566  | -1.449885 | 0.874813  |
| H222 | -5.270976 | -4.816955 | -1.747290 | C34 | 5.223334  | 0.419182  | 2.096148  |
| H223 | -4.699943 | -7.493941 | -4.147270 | N35 | 9.252849  | 2.298157  | 0.593319  |
| H224 | -1.593831 | -1.679187 | -0.634547 | C36 | 9.356797  | 3.294276  | -0.441172 |
| H225 | -0.639735 | -1.604296 | 3.644796  | C37 | 8.198152  | 0.426071  | -4.498015 |
| H226 | 0.751270  | -2.398339 | 3.604667  | C38 | 8.869181  | -0.933941 | -4.273731 |
| S227 | -0.919438 | -5.526700 | -2.336680 | C39 | 8.257494  | -1.671244 | -3.080227 |
| H228 | -1.250906 | -4.319175 | -1.834350 | S40 | 9.049190  | -3.273970 | -2.650642 |
| H229 | -3.055664 | -5.445684 | 1.631878  | C41 | 10.666663 | -2.682843 | -2.025673 |
| C230 | 1.411767  | 3.076326  | -2.084941 | C42 | 2.273307  | 3.493427  | -4.462990 |
| C231 | 2.025253  | 3.494522  | -0.896994 | C43 | 1.616217  | 4.098140  | -3.213121 |
| H232 | 2.395022  | 4.513393  | -0.820614 | C44 | -5.187781 | 4.080402  | -4.202918 |
| C233 | 2.127455  | 2.629757  | 0.194732  | C45 | -5.097465 | 4.617974  | -2.769779 |
| H234 | 2.598908  | 2.972990  | 1.111487  | C46 | -6.082499 | 3.872874  | -1.858224 |
| C235 | 1.616607  | 1.333903  | 0.113897  | C47 | -3.663351 | 4.514696  | -2.230648 |
| H236 | 1.697326  | 0.672906  | 0.972596  | C48 | -6.914846 | 0.940332  | 0.710878  |
| C237 | 0.895954  | 1.773716  | -2.154778 | N49 | -5.504520 | 0.613974  | 0.793279  |
| H238 | 0.410319  | 1.440183  | -3.069001 | C50 | -4.909444 | 0.090299  | 1.875771  |
| C239 | 0.995911  | 0.908753  | -1.065067 | N51 | -5.574986 | -0.101763 | 3.033564  |
| H240 | 0.275505  | 4.093143  | -3.594800 | N52 | -3.609496 | -0.198129 | 1.824971  |
| H241 | 0.568360  | -0.087049 | -1.137609 | C53 | -3.443835 | 0.004249  | -4.359816 |
| S242 | -5.443521 | 4.315699  | 3.154916  | C54 | -2.927750 | -0.822251 | -3.175038 |
| H243 | -5.059531 | 3.124851  | 2.653164  | C55 | -3.293722 | -0.276499 | -1.792626 |

### TS attack at C2:

|     |           |           |           |     |           |           |           |
|-----|-----------|-----------|-----------|-----|-----------|-----------|-----------|
| C1  | -5.057344 | 6.905727  | 1.981686  | N61 | 0.806035  | -0.626068 | -7.222950 |
| C2  | -4.445416 | 7.837178  | 0.932720  | C62 | 2.163731  | -0.670755 | -6.711852 |
| O3  | -3.433149 | 7.554553  | 0.296057  | C63 | 2.606917  | -2.058654 | -6.204577 |
| C4  | -4.550173 | 5.473189  | 1.839554  | C64 | 2.309732  | -2.383990 | -4.723093 |
| N5  | -5.109337 | 9.019844  | 0.786004  | C65 | 3.174029  | -1.543993 | -3.769759 |
| C6  | -4.660702 | 10.076086 | -0.101787 | C66 | 0.821169  | -2.259958 | -4.367460 |
| C7  | 0.077292  | 7.136090  | 0.571193  | C67 | -2.727766 | -5.885063 | -4.546465 |
| C8  | 0.912249  | 7.316118  | -0.693966 | C68 | -4.077262 | -5.421142 | -4.005212 |
| O9  | 2.094504  | 6.984843  | -0.773853 | O69 | -4.270052 | -4.264105 | -3.624595 |
| C10 | 0.655728  | 6.077114  | 1.513342  | C70 | -1.550612 | -5.167676 | -3.891641 |
| C11 | -0.115104 | 5.895795  | 2.834742  | N71 | -5.071447 | -6.345355 | -4.038409 |
| C12 | 0.434293  | 4.686092  | 3.605260  | C72 | -6.452677 | -6.030465 | -3.688275 |
| C13 | -0.088506 | 7.152373  | 3.718000  | C73 | -6.784819 | -6.112685 | -2.189408 |
| N14 | 0.254670  | 7.934625  | -1.719927 | O74 | -7.692159 | -6.833829 | -1.786452 |
| C15 | 0.903076  | 8.264819  | -2.975463 | N75 | -6.022465 | -5.318721 | -1.394363 |
| C16 | 2.718269  | -0.619469 | 9.041857  | C76 | -6.338421 | -5.155111 | 0.016961  |
| C17 | 1.488812  | -0.911246 | 8.444333  | C77 | -5.144232 | -4.733316 | 0.880580  |
| C18 | 3.792828  | -0.256041 | 8.224825  | C78 | -4.068270 | -5.824975 | 0.937034  |
| C19 | 1.328426  | -0.859659 | 7.056104  | C79 | -5.654513 | -4.366490 | 2.280432  |
| C20 | 3.647300  | -0.196988 | 6.839445  | C80 | -3.282091 | -4.645022 | 5.616648  |
| C21 | 2.414704  | -0.505012 | 6.249115  | C81 | -2.527603 | -3.308271 | 5.590279  |
| O22 | 2.360653  | -0.475714 | 4.876833  | C82 | -3.158957 | -2.250783 | 4.667461  |
| C23 | 1.468564  | -5.991798 | 5.988697  | O83 | -4.402076 | -2.128248 | 4.658475  |
| C24 | 2.757390  | -5.410208 | 5.410617  | O84 | -2.358403 | -1.528882 | 3.965426  |
| C25 | 2.505606  | -4.034259 | 4.820556  | O85 | 0.118091  | -1.666409 | 3.304738  |

|      |           |           |           |      |           |           |           |
|------|-----------|-----------|-----------|------|-----------|-----------|-----------|
| H86  | -4.830254 | 5.063146  | 0.868203  | H146 | -2.624834 | -6.972799 | -4.459827 |
| H87  | -3.462997 | 5.455870  | 1.919162  | H147 | -6.660461 | -5.017111 | -4.046709 |
| H88  | -4.795818 | 7.296026  | 2.974221  | H148 | -4.699363 | -3.830454 | 0.433569  |
| H89  | -5.436578 | 10.336431 | -0.829547 | H149 | -6.424983 | -3.589276 | 2.232056  |
| H90  | 0.681714  | 5.117805  | 0.984804  | H150 | -4.859906 | -3.983965 | 2.923740  |
| H91  | 1.701286  | 6.329405  | 1.728403  | H151 | -6.096601 | -5.240706 | 2.774026  |
| H92  | -1.165914 | 5.682643  | 2.585141  | H152 | -3.689815 | -6.074140 | -0.058728 |
| H93  | -0.131348 | 4.508396  | 4.526390  | H153 | -4.471333 | -6.741501 | 1.384953  |
| H94  | 0.389319  | 3.774619  | 3.000173  | H154 | -6.746899 | -6.107688 | 0.367786  |
| H95  | 1.482638  | 4.847564  | 3.885942  | H155 | -2.524627 | -2.875901 | 6.600488  |
| H96  | -0.625074 | 6.981650  | 4.657804  | H156 | -1.479217 | -3.455773 | 5.310434  |
| H97  | -0.552456 | 8.013864  | 3.227524  | H157 | -3.238652 | -5.144900 | 4.643244  |
| H98  | 0.943192  | 7.427499  | 3.970532  | H158 | 8.638224  | 0.950353  | -5.352909 |
| H99  | 0.050688  | 8.116307  | 1.066857  | H159 | 9.939323  | -0.778082 | -4.095217 |
| H100 | 0.557417  | 7.625134  | -3.796588 | H160 | 10.521346 | -1.819200 | -1.372294 |
| H101 | 0.637887  | -1.187450 | 9.060569  | H161 | 11.110106 | -3.503788 | -1.457470 |
| H102 | 4.754751  | -0.012725 | 8.667556  | H162 | -7.557015 | 0.072868  | 0.917717  |
| H103 | 0.370373  | -1.097156 | 6.601482  | H163 | -7.186292 | 1.753083  | 1.396247  |
| H104 | 4.475374  | 0.093671  | 6.200126  | H164 | -7.121074 | 1.274166  | -0.306058 |
| H105 | 1.463762  | -0.654188 | 4.527450  | H165 | -3.157945 | -0.615830 | 2.653809  |
| H106 | 3.142902  | -6.051995 | 4.607082  | C166 | -0.740110 | -2.700728 | 1.503994  |
| H107 | 3.548007  | -5.355444 | 6.168067  | C167 | -0.041934 | -1.937200 | 0.466744  |
| H108 | 0.693372  | -6.045484 | 5.223266  | O168 | -0.980579 | -2.525278 | -0.459496 |
| H109 | 7.670017  | 1.272182  | 2.653950  | C169 | 1.332445  | -2.574097 | 0.330574  |
| H110 | 7.709740  | -0.417744 | 3.097090  | C170 | -0.158150 | -4.071680 | 1.614848  |
| H111 | 6.584940  | 0.648085  | 0.460759  | C171 | 1.098551  | -4.061059 | 0.699905  |
| H112 | 5.516608  | -1.597491 | 0.257340  | H172 | -0.104497 | -0.852518 | 0.498269  |
| H113 | 6.335458  | -2.134313 | 1.729964  | H173 | 1.744159  | -2.441903 | -0.672945 |
| H114 | 7.272033  | -1.751710 | 0.275268  | H174 | 1.964898  | -4.497743 | 1.202371  |
| H115 | 5.270087  | 1.461900  | 2.429435  | H175 | 2.007540  | -2.089996 | 1.043658  |
| H116 | 4.342688  | 0.319924  | 1.454265  | H176 | 0.908494  | -4.649103 | -0.200381 |
| H117 | 5.060985  | -0.203690 | 2.984839  | H177 | 0.085411  | -4.269066 | 2.662856  |
| H118 | 9.235136  | -0.946847 | 1.197423  | H178 | -0.900907 | -4.822360 | 1.324468  |
| H119 | 8.386170  | 3.749541  | -0.673914 | H179 | -1.702494 | -2.407883 | 1.904953  |
| H120 | 2.127078  | 5.019827  | -2.916044 | H180 | 2.290715  | 4.218383  | -5.284912 |
| H121 | 1.724655  | 2.613626  | -4.808859 | H181 | 8.314896  | 1.061516  | -3.613988 |
| H122 | -5.381192 | 5.681151  | -2.787613 | H182 | 8.788333  | -1.557829 | -5.172037 |
| H123 | -6.059679 | 4.264808  | -0.834932 | H183 | 10.051779 | 4.088824  | -0.150208 |
| H124 | -7.112272 | 3.960265  | -2.224540 | H184 | 9.734051  | 2.802587  | -1.337748 |
| H125 | -5.820567 | 2.809433  | -1.818545 | H185 | 9.904509  | 0.287005  | 2.257897  |
| H126 | -3.562961 | 5.016562  | -1.262414 | H186 | 2.832235  | -0.664153 | 10.119934 |
| H127 | -2.948157 | 4.983234  | -2.916417 | H187 | 1.643549  | -6.997760 | 6.380802  |
| H128 | -3.373949 | 3.464753  | -2.106958 | H188 | 1.088639  | -5.369374 | 6.803318  |
| H129 | -4.905087 | 3.021760  | -4.235185 | H189 | -2.853849 | -5.323418 | 6.361531  |
| H130 | -1.838653 | -0.935706 | -3.219592 | H190 | -4.334464 | -4.476412 | 5.856314  |
| H131 | -3.340801 | -1.839757 | -3.221268 | H191 | -7.143484 | -4.413166 | 0.129721  |
| H132 | -2.887235 | 0.940136  | -4.461580 | H192 | -7.115392 | -6.731107 | -4.197172 |
| H133 | -1.598843 | -0.680759 | -8.118736 | H193 | -2.723192 | -5.655470 | -5.621714 |
| H134 | 2.149991  | -2.826282 | -6.844840 | H194 | 2.846121  | -0.347362 | -7.509271 |
| H135 | 3.689879  | -2.144333 | -6.360130 | H195 | -1.340327 | 1.061421  | -8.324325 |
| H136 | 2.601148  | -3.435291 | -4.584254 | H196 | -4.499871 | 0.247600  | -4.220904 |
| H137 | 3.041726  | -1.874141 | -2.733917 | H197 | -3.171881 | -0.269471 | 0.897325  |
| H138 | 2.906348  | -0.482457 | -3.800461 | H198 | -4.942374 | 0.679052  | -0.077022 |
| H139 | 4.239321  | -1.633249 | -4.011503 | H199 | 0.719945  | 9.310571  | -3.245701 |
| H140 | 0.635367  | -2.605306 | -3.344378 | H200 | 1.973680  | 8.110102  | -2.839808 |
| H141 | 0.482849  | -1.221510 | -4.435319 | H201 | -4.382476 | 10.977781 | 0.455479  |
| H142 | 0.198969  | -2.858871 | -5.041447 | H202 | -3.785254 | 9.704160  | -0.633814 |
| H143 | 2.219544  | 0.080595  | -5.922093 | H203 | -6.151642 | 6.936574  | 1.911975  |
| H144 | -1.745744 | -4.095984 | -3.871026 | H204 | 7.124658  | 0.316533  | -4.692056 |
| H145 | -0.637385 | -5.346265 | -4.462535 | H205 | 11.342563 | -2.415659 | -2.841363 |

|      |           |           |           |      |           |           |           |
|------|-----------|-----------|-----------|------|-----------|-----------|-----------|
| H206 | 8.285724  | -1.034635 | -2.191537 | H226 | 0.582591  | -2.415367 | 3.744117  |
| H207 | 7.210318  | -1.924520 | -3.281952 | S227 | -1.260945 | -5.731108 | -2.153051 |
| H208 | -0.963631 | 6.907571  | 0.312447  | H228 | -1.299664 | -4.516211 | -1.567317 |
| H209 | -2.261833 | 0.476934  | -6.936712 | H229 | -3.220805 | -5.504163 | 1.553602  |
| H210 | -6.205400 | 4.167529  | -4.601070 | C230 | 1.614584  | 3.130502  | -2.050346 |
| H211 | -4.516599 | 4.625130  | -4.876567 | C231 | 2.212715  | 3.460179  | -0.827812 |
| H212 | -3.338211 | -0.562761 | -5.289440 | H232 | 2.643694  | 4.449193  | -0.697710 |
| H213 | 3.307174  | 3.197108  | -4.254665 | C233 | 2.231312  | 2.542593  | 0.226075  |
| H214 | 4.425052  | -3.402064 | 5.164988  | H234 | 2.692419  | 2.816545  | 1.171076  |
| H215 | 3.353584  | -2.221299 | 4.472018  | C235 | 1.658865  | 1.279593  | 0.069786  |
| H216 | 9.010136  | 2.589587  | 1.527451  | H236 | 1.672010  | 0.573882  | 0.896158  |
| H217 | 0.604635  | -1.145708 | -8.064234 | C237 | 1.032277  | 1.863342  | -2.194152 |
| H218 | -0.734114 | 8.107992  | -1.612809 | H238 | 0.557024  | 1.593176  | -3.133544 |
| H219 | -5.933262 | 9.177863  | 1.346221  | C239 | 1.059663  | 0.945225  | -1.148116 |
| H220 | -5.171568 | -0.783099 | 3.705052  | H240 | 0.582140  | 4.378840  | -3.456861 |
| H221 | -6.573934 | 0.023346  | 3.040698  | H241 | 0.600875  | -0.026092 | -1.297660 |
| H222 | -5.393607 | -4.662577 | -1.848158 | S242 | -5.290378 | 4.435035  | 3.176111  |
| H223 | -4.836495 | -7.308162 | -4.226794 | H243 | -4.598080 | 3.310475  | 2.906520  |
| H224 | -1.746053 | -1.793941 | -0.682830 |      |           |           |           |
| H225 | -0.803945 | -1.603808 | 3.719785  |      |           |           |           |
